# Supplementary material
Source: publisher figshare collection journal article supplement (https://acs.figshare.com/ndownloader/files/21521049)
Supplement: Supplementary file 1 [file 21521049]

## Sheet: Basic information
No.	The name of the industrial park	Province	City	Industrial park level	Industrial park type	Pillar industries
1	Hefei High-tech Industrial Development Zone	Anhui	Hefei	National level	Machinery and equipment	Household appliances; photovoltaic; public safety
2	Hefei Economic and Technological Development Zone	Anhui	Hefei	National level	Machinery and equipment	Household appliances; automobiles and parts; equipment manufacturing
3	Yaohai Economic Development Zone (New Station Comprehensive Experimental Zone, Hefei Undertaking Industrial Transfer Demonstration Zone)	Anhui	Hefei	-	High technology	Computer, communications and other electronic equipment manufacturing; electrical machinery and equipment manufacturing; metal products industry
4	Anhui Changfeng Shuangfeng Economic Development Zone	Anhui	Hefei	Provincial level	Others	Industry
5	Feixi County Peach Blossom Industrial Park	Anhui	Hefei	Provincial level	Machinery and equipment	Automobile and parts processing; home appliances and accessories
6	Hefei Circular Economy Demonstration Park	Anhui	Hefei	-	Comprehensive	New chemical materials; new energy materials; new building materials
7	Anqing High-tech Industrial Development Zone	Anhui	Anqing	-	Chemical industry	Chemical industry
8	Tongcheng Economic and Technological Development Zone	Anhui	Anqing	National level	Comprehensive	Light industry electronics; machinery manufacturing; new energy new materials
9	Anhui Qianshan Economic Development Zone	Anhui	Anqing	-	Comprehensive	Pharmaceutical and chemical industry; mechanical and electrical; textile and clothing
10	Anhui Wangjiang Economic Development Zone	Anhui	Anqing	-	Light industry	Textile and garment; agricultural and sideline products; emerging manufacturing
11	Grand View Economic Development Zone	Anhui	Anqing	Provincial level	Chemical industry	Fine chemicals; biomedicine; new chemical materials
12	Anhui Yuexi Economic Development Zone	Anhui	Anqing	-	Machinery and equipment	Auto parts electronics; light textile clothing; agricultural and sideline products processing
13	Anhui Susong Economic Development Zone	Anhui	Susong	Provincial level	Comprehensive	Textile and garment; electrical machinery and new building materials; processing of agricultural and sideline products
14	Anhui Susong Linjiang Industrial Park	Anhui	Susong	-	Chemical industry	Light chemical industry; new building materials
15	Xiaoxian Economic Development Zone	Anhui	Suzhou	Provincial level	Chemical industry	Non-metallic mineral products industry; rubber and plastic products industry; chemical raw materials and chemical products manufacturing
16	Jixian Economic Development Zone	Anhui	Suzhou	Provincial level	Comprehensive	Mechanical and electronic; textile and garment; deep processing of agricultural products
17	Suma Modern Industrial Park	Anhui	Suzhou	-	High technology	Deep processing of food and agricultural products; mechanical equipment manufacturing; trade logistics
18	Lai'an Economic Development Zone	Anhui	Chuzhou	-	Chemical industry	Petrochemical; stationery and cultural industries; food processing
19	Luohe Economic Development Zone	Anhui	Chuzhou	-	Machinery and equipment	Equipment manufacturing; machinery manufacturing; wholesale and retail
20	Anhui Quanjiao Economic Development Zone	Anhui	Chuzhou	Provincial level	Machinery and equipment	Mechanical manufacturing; agricultural product processing; clothing
21	Anhui Dingyuan Economic Development Zone	Anhui	Chuzhou	Provincial level	Comprehensive	Rubber and plastic products industry; agricultural and sideline food processing industry; chemical raw materials and chemical products manufacturing
22	Dingyuan Salt Chemical Industrial Park	Anhui	Chuzhou	-	Chemical industry	Chlor-alkali industry; fine chemicals; new chemical materials
23	Anhui Fengyang Economic Development Zone	Anhui	Chuzhou	Provincial level	Chemical industry	Non-metallic mineral products industry; agricultural and sideline food processing industry; tobacco products industry
24	Fengyang Ningguo Modern Industrial Park	Anhui	Chuzhou	-	Chemical industry	Silicon industry
25	Anhui Mingguang Economic Development Zone	Anhui	Chuzhou	Provincial level	Comprehensive	Electrical machinery and equipment manufacturing; computer, communication and other electronic equipment manufacturing; agricultural and sideline food processing industry
26	Zhangzhou Economic and Technological Development Zone	Anhui	Chuzhou	National level	Machinery and equipment	Smart home appliances and electronic information; automotive and advanced equipment; green food
27	Anhui Tianchang Economic Development Zone	Anhui	Chuzhou	Provincial level	Machinery and equipment	Instrument cable; mechanical manufacturing; electronic information
28	Huainan High-tech Zone	Anhui	Huainan	-	High technology	Mechanical manufacturing; new materials; textile and apparel
29	Huainan Pingyi Economic Development Zone	Anhui	Huainan	-	Machinery and equipment	Machinery manufacturing; food processing; coal chemical equipment
30	Anhui Huainan Maoji Economic Development Zone	Anhui	Huainan	-	Industrial and agricultural composites	Deep processing of agricultural and sideline products; electronics; textile
31	Anhui Guzhen Economic Development Zone	Anhui	Bengbu	-	Comprehensive	Biomedical manufacturing; mechanical equipment manufacturing; agricultural and sideline products processing
32	Anhui Yu'an Economic Development Zone	Anhui	Liuan	Provincial level	Comprehensive	Mechanical equipment and auto parts; light industrial textile; new building materials
33	Anhui Huoshan Gaoqiaowan Modern Industrial Park	Anhui	Liuan	-	Machinery and equipment	High-end equipment manufacturing; modernization of traditional Chinese medicine; processing of agricultural and sideline products
34	Jinzhai Modern Industrial Park	Anhui	Liuan	-	Comprehensive	Clean energy; agricultural product processing; machining
35	Anhui Shucheng Economic Development Zone	Anhui	Liuan	-	Light industry	Food processing; baby carriage crib; automobile and motorcycle accessories
36	Yeji Economic Development Zone	Anhui	Liuan	-	Industrial and agricultural composites	Manufacturing
37	Anhui Shuyang Economic Development Zone	Anhui	Tongling	-	Comprehensive	Textile and garment; new materials; auto parts and equipment manufacturing
38	Tongling Bridge Economic Development Zone	Anhui	Tongling	-	Others	Dismantling industry; building materials manufacturing; mechanical and electronic processing manufacturing
39	Anhui Tongling Jinqiao Economic Development Zone	Anhui	Tongling	-	High technology	Copper-based new materials; advanced equipment manufacturing; electronic information
40	Tongling Economic and Technological Development Zone	Anhui	Tongling	National level	Metallurgy	Copper processing; electronic components; equipment manufacturing
41	Anhui Tongling Lion Mountain High-tech Industrial Development Zone	Anhui	Tongling	Provincial level	Metallurgy	Copper deep processing; photovoltaic optoelectronics; general equipment manufacturing
42	Zhangzhou Economic Development Zone	Anhui	Bozhou	Provincial level	Industrial and agricultural composites	Modern Chinese medicine industry
43	Yucheng Economic Development Zone	Anhui	Bozhou	-	Industrial and agricultural composites	Traditional Chinese medicine manufacturing; labor-intensive manufacturing; agricultural and sideline products processing industry
44	Anhui 0 is Gaogou Economic Development Zone	Anhui	Wuhu	-	Others	Wire and cable manufacturing
45	Anhui Wuhu Hanjiang Economic Development Zone	Anhui	Wuhu	-	Comprehensive	Auto parts; electrical machinery and equipment manufacturing; non-ferrous metal smelting and rolling processing industry
46	Wuhu Suncun Economic Development Zone	Anhui	Wuhu	-	Metallurgy	Black metal mining and dressing industry; textile and garment, apparel industry; textile industry
47	Anhui Wuwei Economic Development Zone	Anhui	Wuhu	-	Comprehensive	Fine chemicals; equipment manufacturing; deep processing of agricultural and sideline products
48	Wuhu High-tech Industrial Development Zone	Anhui	Wuhu	National level	High technology	New energy automobile and parts industry; energy conservation and environmental protection industry; electronic information industry
49	Anhui Xinyi Economic Development Zone	Anhui	Wuhu	-	Machinery and equipment	High-end equipment manufacturing and auto parts; electronic appliances; new energy, new materials
50	Chizhou Dadukou Economic Development Zone (Shitai Industrial Park)	Anhui	Chizhou	-	Industrial and agricultural composites	Green food and agricultural and sideline products processing; intelligent equipment manufacturing; modern service industry
51	Anhui Dongzhi Economic Development Zone	Anhui	Chizhou	Provincial level	Chemical industry	Fine chemical industry; pharmaceutical industry
52	Anhui Jieshou Economic Development Zone	Anhui	Fuyang	Provincial level	Others	Circular economy industry; nutrition and health industry
53	Anhui Taihe Economic Development Zone	Anhui	Fuyang	Provincial level	High technology	Biomedicine; light industrial textile; agricultural and sideline products
54	Puyang Economic and Technological Development Zone	Anhui	Fuyang	Provincial level	High technology	Modern service industry based on trade and logistics; textile and garment; machinery and equipment and special vehicles and auto parts manufacturing
55	Anhui Linquan Economic Development Zone	Anhui	Fuyang	Provincial level	Chemical industry	Mechatronics; leather; chemical
56	Anhui Weinan Economic Development Zone	Anhui	Fuyang	Provincial level	Comprehensive	Willow culture industry; textile and garment industry; machinery and electronics industry
57	Anhui Guangde Economic Development Zone	Anhui	Guangde	Provincial level	High technology	Information electronics (PCB); mechanical manufacturing; new materials
58	Xinhang Economic Development Zone	Anhui	Guangde	-	Machinery and equipment	Auto parts; water pump; phosgene industry
59	Huaibei Economic Development Zone	Anhui	Huaibei	Provincial level	High technology	Electronic information; new materials; equipment manufacturing
60	Anhui (Huaibei) new coal chemical synthetic material base	Anhui	Huaibei	-	Chemical industry	Coal chemical industry
61	Huaibei Fenghuangshan Economic Development Zone	Anhui	Huaibei	-	Industrial and agricultural composites	Agricultural and sideline food processing industry; food manufacturing; wine, beverage and refined tea manufacturing
62	Huaibei Duji Economic Development Zone	Anhui	Huaibei	-	Machinery and equipment	Mining machinery and equipment manufacturing
63	Anhui Huaibei Lieshan Economic Development Zone	Anhui	Huaibei	-	Machinery and equipment	Business logistics; machinery and electronics; high-tech industry
64	Tunxi Economic Development Zone	Anhui	Huaibei	Provincial level	Metallurgy	Metal and non-metallic mineral products industry; chemical raw materials and chemical manufacturing; special equipment manufacturing
65	Huangshan Industrial Park	Anhui	Huangshan	-	Metallurgy	Non-ferrous metal smelting and rolling processing industry; deep processing of agricultural and sideline products (green food); new materials
66	Anhui Tuenmen Economic Development Zone	Anhui	Huangshan	-	Machinery and equipment	Electrical and electronic equipment; green food
67	Anhui Hanshan Industrial Park	Anhui	Maanshan	Provincial level	Machinery and equipment	Mechanical casting; environmental protection equipment; railway equipment
68	Anhui Hanshan Economic Development Zone	Anhui	Maanshan	-	Machinery and equipment	Refrigeration accessories; agricultural and sideline products processing industry; light industrial clothing
69	Anhui Hexian Economic Development Zone	Anhui	Maanshan	Provincial level	Machinery and equipment	Electrical machinery and equipment manufacturing; high-end equipment manufacturing
70	Anhui Fine Chemical Industry Organic Synthesis Base	Anhui	Maanshan	-	Chemical industry	Chemical industry
71	Ma'anshan Cihu High-tech Industrial Development Zone	Anhui	Maanshan	National level	Comprehensive	Modern chemical industry; equipment manufacturing; modern service
72	Maanshan undertakes industrial transfer concentration demonstration park	Anhui	Maanshan	-	High technology	Electronic information consumption; intelligent equipment manufacturing; green energy saving and environmental protection
73	Beijing Economic and Technological Development Zone	Beijing	Yizhuang District	National level	High technology	Electronic information industry; biomedical industry; automobile and transportation equipment industry
74	Beijing Mining Economic Development Zone	Beijing	Daxing District	Provincial level	Machinery and equipment	New energy vehicles and auto parts manufacturing
75	Beijing Xinggu Economic Development Zone	Beijing	Pinggu District	Provincial level	Others	Food manufacturing
76	Beijing Mafang Industrial Park	Beijing	Pinggu District	Provincial level	High technology	High-end manufacturing; big health industry; energy and environmental protection
77	Beijing Yanqi Economic Development Zone	Beijing	Huairou District	Provincial level	Light industry	Urban industry; auto parts manufacturing
78	Beijing Miyun Economic Development Zone	Beijing	Miyun District	Provincial level	Machinery and equipment	Automobile manufacturing; food and beverage manufacturing; electronic equipment and electrical machinery manufacturing
79	Beijing Yanqing Economic Development Zone	Beijing	Yanqing District	Provincial level	Light industry	Medicine; new materials; textile and clothing
80	Beijing Badaling Economic Development Zone	Beijing	Yanqing District	-	High technology	New energy
81	Zhongguancun Life Science Park	Beijing	Changping District	-	High technology	Biopharmaceutical; diagnostic reagent
82	Beijing Opto-mechatronics Industrial Base	Beijing	Tongzhou District	-	Comprehensive	Auto parts; electronic information; chemical industry
83	Beijing high-end manufacturing base	Beijing	Fangshan District	-	Comprehensive	New energy vehicles; cloud computing big data industry; cutting-edge new material technology
84	Fengchuan Industrial Park, Yongchuan Industrial Park	Chongqing	Yongchuan District	Provincial level	High technology	Robotics and smart equipment; automotive and parts manufacturing; electronic information
85	Yongchuan Industrial Park Gangqiao Industrial Park	Chongqing	Yongchuan District	Provincial level	Comprehensive	Light industry papermaking; comprehensive utilization of urban mineral renewable resources; building new materials and residential industrialization
86	Yongchuan Industrial Park Sanchuan Industrial Park	Chongqing	Yongchuan District	Provincial level	Others	Urban minerals; automobile and parts manufacturing; machinery and equipment
87	Chongqing Tongxing Industrial Park	Chongqing	Beibei District	-	Machinery and equipment	Automobile and motorcycle manufacturing; equipment manufacturing
88	Chongqing Dazu Industrial Park	Chongqing	Dazu District	-	Machinery and equipment	Hardware manufacturing; automobile and motorcycle parts manufacturing; home industry; intelligent manufacturing equipment; automobile and motorcycle vehicles and key parts and components; environmental protection equipment
89	Posting Industrial Park	Chongqing	Shuangqiao economic and Technological Development District	Provincial level	Machinery and equipment	Circular economy industry; electronic information industry; automobile and motorcycle parts industry
90	Innovative Economic Corridor (formerly Taiwanese Industrial Park)	Chongqing	Yubei District	-	Light industry	Garment production; auto parts; food manufacturing
91	Chongqing Linkong Logistics Development and Construction Co., Ltd. (formerly Chongqing Airport Industrial Park)	Chongqing	Yubei District	-	Machinery and equipment	Automobile manufacturing; motorcycle manufacturing
92	Chongqing Airport New City Development and Construction Co., Ltd. (formerly Airport New City)	Chongqing	Yubei District	-	Others	real estate
93	Chongqing Zhengyang Industrial Park	Chongqing	Qianjiang District	-	Others	Electric and mining co-production; light textile food; biomedicine
94	Chongqing Western Modern Logistics Industrial Park	Chongqing	Shazhoubei District	-	Others	Logistics and warehousing
95	Chongqing Baitao Chemical Industry Park Management Committee	Chongqing	Fuling District	-	Chemical industry	Natural gas chemicals; polyamides and polyurethanes; chlor-alkali fine chemicals and electronic chemistry
96	Chongqing Fuling Industrial Park	Chongqing	Fuling District	-	Comprehensive	Equipment manufacturing; food and medicine; electronic information; materials
97	Wanzhou Economic and Technological Development Zone	Chongqing	Wanzhou District	National level	Chemical industry	Characteristic chemical industry; new building materials
98	Qijiang Beidu Aluminum Industrial Park	Chongqing	Qijiang District	-	Metallurgy	Aluminum industry; building materials; electricity
99	Chongqing Wansheng Economic and Technological Development Zone Coal-Electrification Industrial Park	Chongqing	Wansheng District	-	Chemical industry	Coal power; coal chemical industry
100	Wansheng Economic Development Zone Pingshan Industrial Park	Chongqing	Wansheng District	-	High technology	New materials; equipment manufacturing; biomedicine
101	Chongqing Economic and Technological Development Zone	Chongqing	Nanan District	National level	Machinery and equipment	Electronic information; equipment manufacturing; modern service industry
102	Chongqing Dianjiang Industrial Park	Chongqing	Dianjiang District	Provincial level	Machinery and equipment	Automobiles and parts; timepieces and precision machining; biomedicine
103	Jianqiao Industrial Park	Chongqing	Dadukou District	-	Chemical industry	Railway, marine, aerospace and other transportation equipment; non-metallic mineral products industry; audio-visual equipment manufacturing
104	Xiuyu Lingang Industrial Park	Fujian	Putian	Provincial level	Chemical industry	Energy; chemical industry; steel industry
105	Xianyou Economic Development Zone	Fujian	Putian	Provincial level	Light industry	Chemical industry; footwear and clothing manufacturing
106	Hualin Economic Development Zone	Fujian	Putian	Provincial level	Light industry	Shoes and clothes; electronics; food manufacturing
107	Yongchun County Industrial Park	Fujian	Quanzhou	Provincial level	Light industry	Textile; machinery; biomedicine
108	Zhangpu Chihu Leather Park	Fujian	Zhangzhou	-	Light industry	Tanning industry
109	Fujian Longyan Economic Development Zone	Fujian	Longyan	-	Chemical industry	Machinery; chemical industry; building materials
110	Shanghang Yuyang Gold and Copper Industrial Park	Fujian	Longyan	-	Chemical industry	Copper smelting
111	Jinjiang (Changting) Industrial Park	Fujian	Longyan	-	Light industry	Textile; processing of agricultural and sideline products
112	Longyan High-tech Zone Changting Industrial Park Management Committee	Fujian	Longyan	National level	Light industry	Textile and garment; mechatronics; rare earth deep processing
113	Fujian (Longyan) Rare Earth Industrial Park	Fujian	Longyan	-	Metallurgy	Rare earth deep processing
114	Fujian Wuping Industrial Park Management Committee	Fujian	Longyan	-	Metallurgy	Stainless steel manufacturing; machinery manufacturing; agricultural and forestry products deep processing industry
115	Yanqian Industrial Concentration Zone	Fujian	Sanming	-	Others	Printed circuit board; mineral processing; new display manufacturing
116	Jinming Park, Sanming High-tech Industrial Development Zone	Fujian	Sanming	National level	Comprehensive	Mechanical manufacturing; biological food; new energy materials
117	Shaxian Jingu Industrial Park	Fujian	Sanming	-	Comprehensive	Mechanical manufacturing; biological food; forestry chemical industry
118	Yongan Nega Development Zone	Fujian	Sanming	-	Light industry	Textile; chemistry; forest bamboo
119	Dongqiao Economic and Technological Development Zone	Fujian	Ningde	National level	Comprehensive	Electrical machinery; food processing; new energy and new materials
120	Fu'an Economic Development Zone (Xixi Industrial Park)	Fujian	Fuan	-	Machinery and equipment	Paper industry; motor; furniture manufacturing
121	Fujian Shouning Industrial Park	Fujian	Ningde	Provincial level	Machinery and equipment	Manufacturing
122	Shouning County Jiwu Industrial Concentration Zone	Fujian	Ningde	-	Machinery and equipment	Manufacturing
123	Fuding Industrial Park	Fujian	Ningde	Provincial level	Light industry	Food; synthetic leather; machinery manufacturing
124	Xiamen Jimei (Xinglin) Taiwanese Investment Zone	Fujian	Xiamen	National level	Comprehensive	Automobile; machinery manufacturing; electronics manufacturing
125	Silver High-tech Industrial Development Zone	Gansu	Baiyin	National level	Metallurgy	Chemical industry; non-ferrous rare earth; resource recycling industry
126	Gansu Baiyin West District Economic Development Zone	Gansu	Baiyin	Provincial level	Chemical industry	New energy-saving building materials; chemical industry
127	Gansu Baiyin Pingchuan Economic Development Zone	Gansu	Baiyin	Provincial level	Comprehensive	Ceramic building materials; agricultural product processing; high-tech equipment manufacturing
128	Silver Liuchuan Industrial Concentration Zone	Gansu	Baiyin	-	Comprehensive	Ceramics; electrolytic aluminum and aluminum profiles processing; carbon fiber
129	Gannan Cooperation Ecological Industrial Park	Gansu	Gannan Tibetan Autonomous Prefecture	-	Industrial and agricultural composites	Green agricultural and livestock products industry; Chinese and Tibetan medicine processing industry; national special needs goods industry
130	Xiahe Anduo Circular Economy Demonstration Park	Gansu	Gannan Tibetan Autonomous Prefecture	-	Comprehensive	Building materials; livestock production; clean energy production
131	Jinchang Economic and Technological Development Zone	Gansu	Jinchang	National level	Metallurgy	Non-ferrous metals industry; chemical industry; new energy and equipment manufacturing
132	Yongchang Industrial Park	Gansu	Jinchang	-	Machinery and equipment	Agricultural and sideline products manufacturing; agricultural machinery manufacturing; trade logistics
133	Huating Industrial Park	Gansu	Pingliang	Provincial level	Chemical industry	Coal chemical industry; new wall materials; mining equipment manufacturing
134	Jingning Industrial Park	Gansu	Pingliang	Provincial level	Industrial and agricultural composites	Agricultural and sideline products processing
135	Pingliang Industrial Park	Gansu	Pingliang	Provincial level	Chemical industry	Coal electrolysis; deep processing of agricultural and sideline products; equipment manufacturing
136	Qingyang Xifeng Industrial Park	Gansu	Qingyang	Provincial level	Chemical industry	Petrochemical
137	Wuwei Industrial Park	Gansu	Wuwei	Provincial level	Industrial and agricultural composites	Food and agricultural and sideline products processing; biomedicine; mechanical building materials
138	Wuwei Huangyang Industrial Park	Gansu	Wuwei	National level	Industrial and agricultural composites	Agricultural and sideline products processing; biomedicine; modern logistics
139	Wuwei Minqin Industrial Park	Gansu	Wuwei	-	Comprehensive	Agricultural product processing; building materials; comprehensive utilization of resources
140	Minqin Hongshagang Industrial Cluster Area	Gansu	Wuwei	-	Comprehensive	Coal-electricity chemical industry; clean energy; equipment manufacturing; building materials chemical industry
141	Tianzhu County Guangou Industrial Park	Gansu	Wuwei	-	High technology	New carbon material manufacturing
142	Zhangye Economic and Technological Development Zone	Gansu	Zhangye	National level	Comprehensive	Metallurgical chemical industry; electric energy industry; biomedical industry
143	Gaotai Industrial Park	Gansu	Zhangye	Provincial level	Industrial and agricultural composites	Intensive processing of agricultural and sideline products; chemical industry; equipment manufacturing
144	Minle Ecological Industrial Park	Gansu	Zhangye	Provincial level	Industrial and agricultural composites	Processing of agricultural and sideline products; processing of Chinese herbal medicines; manufacturing of new chemical materials
145	Gansu Shandan Chengbei Industrial Park	Gansu	Zhangye	Provincial level	Comprehensive	Building materials; agricultural and sideline products processing; smelting chemical industry
146	Gansu Dingxi Economic Development Zone	Gansu	Dingxi	Provincial level	Industrial and agricultural composites	Potato industry; Chinese medicine industry
147	Gansu Minxi Economic Development Zone	Gansu	Dingxi	Provincial level	Industrial and agricultural composites	Chinese medicine industry
148	Gansu Linyi Economic Development Zone	Gansu	Dingxi	Provincial level	Metallurgy	Building materials; metallurgy; processing of agricultural and sideline products
149	Gansu County Industrial Park	Gansu	Dingxi	Provincial level	Light industry	Pharmaceutical manufacturing
150	Jixian Industrial Concentration Zone	Gansu	Dingxi	-	Others	Industry
151	Gansu Dongxiang Economic Development Zone	Gansu	Linxia	Provincial level	Comprehensive	Food processing; metal profiles; hydropower development
152	Gansu Guanghe Economic Development Zone	Gansu	Linxia	Provincial level	Light industry	Leather wool textile manufacturing; hydropower energy
153	Gansu Linxia Economic Development Zone	Gansu	Linxia	Provincial level	Industrial and agricultural composites	Halal food; national special needs manufacturing
154	Gansu Yongjing Industrial Park	Gansu	Linxia	Provincial level	Comprehensive	Equipment manufacturing; smelting; chemical industry
155	Jiuquan Economic and Technological Development Zone	Gansu	Jiuquan	National level	Machinery and equipment	New energy equipment manufacturing; agricultural and sideline products processing; building materials
156	Gansu Yumen Economic Development Zone	Gansu	Jiuquan	Provincial level	Chemical industry	Petrochemical; coal chemical industry; equipment manufacturing
157	Jiuquan Modern Resources Comprehensive Utilization Industrial Park	Gansu	Jiuquan	-	Comprehensive	Modern equipment manufacturing; new chemical industry; metallurgy and deep processing industry
158	Lanzhou Kyushu Development Zone	Gansu	Lanzhou	Provincial level	Light industry	Food processing; electronics manufacturing
159	Lanzhou High-tech Industrial Development Zone	Gansu	Lanzhou	National level	High technology	Biomedicine; new materials; new energy
160	Lanzhou Lianhai Economic Development Zone Honggu Park Management Committee	Gansu	Lanzhou	-	Chemical industry	Coal chemical industry; carbon industry
161	Lanzhou Lianhai Economic Development Zone (Yongdeng Park)	Gansu	Lanzhou	Provincial level	Metallurgy	Aluminum products; ferroalloys; thermal power industry
162	Lanzhou Yuzhong Peace Industrial Park	Gansu	Lanzhou	Provincial level	Metallurgy	Lithium battery cathode material and its precursors; electrolytic cobalt and cobalt powder; high purity metal and precious metal deep processing products
163	Huixian Industrial Concentration Zone, Weinan City	Gansu	Longnan	-	Comprehensive	Liquor industry; agricultural and sideline products deep processing industry; biopharmaceutical industry
164	Xicheng Economic Development Zone (Chengxian Park)	Gansu	Longnan	Provincial level	Metallurgy	Non-ferrous metals industry; building materials manufacturing; agricultural and sideline products processing
165	Tianshui Economic and Technological Development Zone	Gansu	Tianshui	National level	Light industry	Electrical and electronic; mechanical manufacturing; medical food
166	Wushan County Industrial Park	Gansu	Tianshui	-	Comprehensive	Agricultural product processing; new building materials manufacturing; trade logistics
167	Jiayuguan Industrial Park	Gansu	Jiayuguan	Provincial level	Metallurgy	Non-ferrous metal smelting; processing of metal products; food processing and brewing
168	Zengcheng Economic and Technological Development Zone	Guangdong	Guangzhou	National level	Machinery and equipment	Industry
169	Guangdong Conghua Economic Development Zone	Guangdong	Guangzhou	Provincial level	Chemical industry	Fine chemicals; non-ferrous metals, machinery manufacturing, automobiles and parts and components; food and beverage industry
170	Guangzhou Yunpu Industrial Park	Guangdong	Guangzhou	-	Light industry	Chemical industry; electronics industry; daily chemical industry
171	Zhuhai Economic and Technological Development Zone	Guangdong	Zhuhai	National level	Chemical industry	Clean energy; petrochemical; equipment manufacturing
172	Spring Lake Industrial Park	Guangdong	Shantou	-	Light industry	Packaging materials manufacturing; garment manufacturing; metal processing industry
173	Guangdong Xiqiao Textile Industry Base	Guangdong	Foshan	-	Light industry	Textile printing and dyeing industry
174	China (Sanshui) International Water Capital Beverage Food Base	Guangdong	Foshan	-	Light industry	Beverage food manufacturing
175	Nanxiong Industrial Transfer Industrial Park	Guangdong	Nanxiong	-	Chemical industry	Chemical industry
176	Renhua County Nonferrous Metals Circular Economy Industrial Base	Guangdong	Shaoguan	-	Chemical industry	Non-ferrous metal deep processing industry
177	Lechang Industrial Transfer Industrial Park	Guangdong	Shaoguan	-	Machinery and equipment	Mechanical equipment manufacturing; textile and garment manufacturing
178	Guangdong Ruyuan Economic Development Zone	Guangdong	Shaoguan	Provincial level	Metallurgy	Aluminum foil (non-ferrous metal processing); electronic components; food processing industry
179	Shaoguan Xinfeng Industrial Cluster	Guangdong	Shaoguan	-	Building materials	Building materials industry; rare earth industry
180	Dongguan (Shaoguan) Industrial Transfer Industrial Park (Guangdong Shaoguan Industrial Park)	Guangdong	Shaoguan	-	Light industry	Machinery and toy manufacturing
181	Dongguan (Shaoguan) Industrial Transfer Industrial Park (Qujiang District)	Guangdong	Shaoguan	-	Metallurgy	Food manufacturing industry; electronics industry; metal processing industry
182	Dongguan (Shaoguan) Industrial Transfer Industrial Park (Xinfeng Cluster)	Guangdong	Shaoguan	-	Comprehensive	Building materials industry; rare earth industry
183	Dongguan (Shaoguan) Industrial Transfer Industrial Park (Renhua Cluster)	Guangdong	Shaoguan	-	Metallurgy	Non-ferrous metal deep processing industry
184	Guangzhou (Meizhou) Industrial Transfer Industrial Park	Guangdong	Meizhou	-	High technology	Computer, communications and other electronic equipment manufacturing; biomedicine, food and beverage manufacturing; machinery and equipment manufacturing
185	Guangdong Meizhou Jiaohua Industrial Park	Guangdong	Meizhou	Provincial level	Building materials	Food and medicine; new building materials; machinery manufacturing
186	Dongguan Shijie (Xingning) Industrial Transfer Industrial Park	Guangdong	Meizhou	-	Machinery and equipment	Equipment manufacturing industry; food and drug; hardware electronics manufacturing
187	Guangzhou Nansha (Pingyuan) Industrial Transfer Industrial Park	Guangdong	Meizhou	-	Comprehensive	Metallurgy
188	Guangzhou Panyu (Wuhua) Industrial Transfer Industrial Park	Guangdong	Meizhou	-	Comprehensive	Hardware & Electrical; Pharmaceutical Manufacturing; Plastic Recycling Resources Manufacturing
189	Guangzhou Haizhu (Fengshun) Industrial Transfer Industrial Park	Guangdong	Meizhou	-	Others	Electronic electroacoustics; green feed manufacturing; biomedicine
190	Huiyang Economic Development Zone	Guangdong	Huizhou	Provincial level	High technology	Electronic information industry
191	Huizhou Industrial Transfer Industrial Park	Guangdong	Huizhou	-	Building materials	New building materials; electronic information industry
192	Huinan High-tech Industrial Park	Guangdong	Huizhou	National level	High technology	Electronic communication industry
193	Huizhou Zhongkai High-tech Zone Dongjiang High-tech Industrial Park	Guangdong	Huizhou	National level	High technology	Electronic information industry
194	Huizhou Daya Bay Petrochemical Industrial Zone	Guangdong	Huizhou	National level	Chemical industry	Petrochemical industry
195	Shenzhen (Shanwei) Industrial Transfer Industrial Park	Guangdong	Shanwei	-	Machinery and equipment	Electronic equipment; food manufacturing; information technology industry
196	Haifeng County Industrial Transfer Industrial Park	Guangdong	Shanwei	-	Others	Labor-intensive manufacturing
197	Jiangmen City Jianeng Recycling Resources Recycling Market	Guangdong	Jiangmen	-	Others	Renewable resource manufacturing
198	Jiangmen High-tech Zone	Guangdong	Jiangmen	National level	Comprehensive	Electrical machinery and equipment manufacturing; communications equipment, computers and other electronic equipment manufacturing; chemical raw materials and chemical manufacturing
199	Guangdong Yinzhou Lake Paper Base	Guangdong	Jiangmen	National level	Light industry	Power generation; papermaking and upstream and downstream industries
200	Shuangshui scrap steel recycling industrial base	Guangdong	Jiangmen	National level	Machinery and equipment	Shipbreaking; steel products industry
201	Jiangmen Industrial Transfer Industrial Park (Kaiping Park)	Guangdong	Jiangmen	-	Machinery and equipment	Hardware manufacturing
202	Jiangmen Industrial Transfer Industrial Park (Enping Park)	Guangdong	Jiangmen	-	Light industry	Electronic information industry; textile manufacturing
203	Zhongshan Torch (Yangxi) Industrial Transfer Industrial Park	Guangdong	Yangjiang	-	Machinery and equipment	Food and medicine; hardware electronics manufacturing
204	Maoming Industry Transfer Industrial Park	Guangdong	Maoming	Provincial level	Chemical industry	Petrochemical; equipment manufacturing industry; food processing industry
205	Guangzhou Baiyun Jianggao (Electric White) Industrial Transfer Industrial Park	Guangdong	Maoming	-	Light industry	Aquatic product processing; textile and garment; flavor and fragrance manufacturing
206	Guangdong Maoming Maonan Economic Development Zone	Guangdong	Maoming	-	Industrial and agricultural composites	Feed manufacturing industry
207	Maonan Industrial Transfer Industrial Park Management Office	Guangdong	Maoming	-	Light industry	Light industry; agro-industrial industry
208	Maoming Maonan Petrochemical Industrial Park	Guangdong	Maoming	-	Chemical industry	Petrochemical refining; fine chemical industry
209	Gaozhou Industrial Transfer Industrial Park	Guangdong	Maoming	-	Comprehensive	Foundry industry; kaolin manufacturing industry; aquatic product processing industry
210	Guangdong Xinyi Economic Development Zone	Guangdong	Maoming	Provincial level	High technology	Business; financial industry
211	Xinyi Industrial Transfer Industrial Park	Guangdong	Maoming	-	Comprehensive	Crafts manufacturing; electronic and electrical manufacturing; metal products processing industry
212	Huazhou Industrial Transfer Industrial Park	Guangdong	Maoming	Provincial level	Metallurgy	Plastic; furniture; stainless steel manufacturing
213	Huazhou Hexi Industrial Park	Guangdong	Maoming	-	High technology	Food processing; biopharmaceutical industry
214	Huazhou Yangmei Industrial Park	Guangdong	Maoming	-	Light industry	Food processing industry
215	Zhaoqing High-tech Zone Circular Economy Industrial Park	Guangdong	Zhaoqing	-	Machinery and equipment	Advanced equipment manufacturing industry; biomedical food industry
216	Zhaoqing City South China Renewable Resources Industry Base	Guangdong	Zhaoqing	-	Others	Recycled plastics manufacturing
217	Chaozhou Port Economic Development Zone (Lingang Park)	Guangdong	Chaozhou	Provincial level	Others	Energy; logistics
218	Foshan Shunde (Yunfu Xinxing Xincheng) Industrial Transfer Industrial Park	Guangdong	Yunfu	-	Metallurgy	Metal products; machinery manufacturing
219	Yunfu Circular Economy Industrial Park	Guangdong	Yunfu	-	Building materials	New environmentally friendly building materials; fine chemicals; modern logistics (ports)
220	Yunfu (Luoding) Circular Economy Industrial Park	Guangdong	Yunfu	-	Light industry	Hardware machinery; daily necessities; pharmaceutical industry
221	Shenzhen National Independent Innovation Demonstration Zone Longgang Park	Guangdong	Shenzhen	National level	High technology	New generation of information technology; energy conservation and environmental protection industry; new energy industry
222	Nanning Economic and Technological Development Zone	Guangxi	Nanning	National level	Comprehensive	Food; equipment manufacturing; biomedicine
223	Guangxi-ASEAN Economic Development Zone	Guangxi	Nanning	National level	Comprehensive	Food processing; machinery manufacturing; bio-manufacturing
224	Nanning Liujing Industrial Park	Guangxi	Nanning	Provincial level	Comprehensive	Pulp and paper; power and chemical industry; machinery and equipment manufacturing
225	Nanning Jiangnan Industrial Park	Guangxi	Nanning	Provincial level	Comprehensive	Electronic information industry; aluminum processing; feed production industry
226	Guangxi Luzhai Economic Development Zone	Guangxi	Liuzhou	Provincial level	Comprehensive	Silk; building materials; chemical industry
227	Liucheng County Industrial Zone	Guangxi	Liuzhou	-	Comprehensive	Chemical industry; agricultural product processing; mechanical auto parts manufacturing
228	Guilin National High-tech Industrial Development Zone	Guangxi	Guilin	National level	Comprehensive	Equipment manufacturing; electronic information; biomedicine
229	Lingchuan Bali Street Industrial Park	Guangxi	Guilin	Provincial level	Comprehensive	Mechanical manufacturing; electronic information; modern service
230	Guilin Xicheng Economic Development Zone	Guangxi	Guilin	Provincial level	Comprehensive	Mechanical manufacturing; electronic information; biomedicine
231	Zhangpu County Industrial Concentration Zone	Guangxi	Guilin	-	Comprehensive	Food, hangers, hardware, biological extraction, packaging industry
232	Quanzhou County Industrial Concentration Zone	Guangxi	Guilin	-	Comprehensive	Smelting; food manufacturing
233	Guangxi Luzhou Renewable Resources Recycling Park	Guangxi	Wuzhou	-	Others	Renewable resource processing industry
234	Cangzhou Eastern Industrial Transfer Park (Chuzhou Recycled Stainless Steel Products Industrial Park)	Guangxi	Wuzhou	-	Others	Recycled stainless steel products manufacturing
235	Beihai Export Processing Zone (A District)	Guangxi	Beihai	National level	Machinery and equipment	Electronic information, precision machinery
236	Beihai Tieshan Port (Linhai) Industrial Zone	Guangxi	Beihai	-	Chemical industry	Petrochemical industry
237	Dongxing Border Economic Cooperation Zone	Guangxi	Dongxing	National level	Light industry	Processing and trade
238	Fangchenggang City Qisha Industrial Zone	Guangxi	Fangchenggang	-	Comprehensive	Non-ferrous metals; energy; steel
239	Fangchenggang Southwest Southwest Lingang Industrial Park	Guangxi	Fangchenggang	-	Comprehensive	Steel; phosphoric acid; grain and oil manufacturing
240	Fangchenggang Shangsi County Industrial Concentration Zone	Guangxi	Fangchenggang	-	Light industry	Sugar production; cement; forest board manufacturing
241	Guangxi Beiliu Daily Ceramics Industrial Park	Guangxi	Yulin	Provincial level	Light industry	Ceramic manufacturing
242	Guigang District Industrial Park, Guigang City	Guangxi	Guigang	-	Building materials	Cement; forest products; chemical industry
243	Guigang National Eco-industrial (sugar) Demonstration Park	Guangxi	Guigang	-	Light industry	Sugar industry; power industry
244	Guigang Industrial Park (Jiangnan Park)	Guangxi	Guigang	Provincial level	Comprehensive	Wood industry; down; leather manufacturing
245	Guigang Industrial Park (Shikayuan)	Guangxi	Guigang	-	Comprehensive	Shipbuilding; feed; cement manufacturing
246	Guigang Industrial Park (Guangzhou-Guiyuan Park)	Guangxi	Guigang	-	Comprehensive	Paper making; sugar making; thermoelectric industry
247	Guangxi Tiandong Petrochemical Industrial Park	Guangxi	Baise	-	Comprehensive	Petrochemical; chlor-alkali chemical industry; aluminum industry
248	Debao County Industrial Concentration Zone	Guangxi	Baise	-	Comprehensive	Aluminum industry
249	Guangxi Baise Industrial Park	Guangxi	Baise	Provincial level	Comprehensive	Aluminum industry; chemical industry; equipment manufacturing
250	Pingguo Industrial Zone	Guangxi	Baise	-	Comprehensive	Aluminum processing
251	Guangxi Yizhou Economic Development Zone	Guangxi	Hechi	Provincial level	Comprehensive	Silk; chemical; comprehensive utilization of sugar cane
252	Guangxi Laibin High-tech Industrial Development Zone	Guangxi	Laibin	-	Comprehensive	Information technology; advanced manufacturing; new materials
253	Laibin Industrial Zone	Guangxi	Laibin	-	Comprehensive	Electricity production and supply industry; smelting industry; sugar production and comprehensive utilization industry
254	Guangxi Hezhou Huarun Circular Economy Industrial Demonstration Zone	Guangxi	Hezhou	-	Comprehensive	Electricity; cement; beer manufacturing
255	Hezhou Zhongshan Industrial Park	Guangxi	Hezhou	-	Comprehensive	Non-ferrous metal processing; forest board deep processing; machinery manufacturing
256	Kaiyang County Industrial Park	Guizhou	Guiyang	Provincial level	Chemical industry	Phosphorus chemical industry; coal chemical industry
257	Qingzhen Economic Development Zone	Guizhou	Guiyang	Provincial level	Metallurgy	Non-ferrous metals; building materials; pharmaceutical manufacturing
258	Xifeng Circular Economy Phosphorus Coal Ecological Chemical Industrial Park	Guizhou	Guiyang	Provincial level	Chemical industry	Phosphorus chemical industry; coal chemical industry; building materials industry
259	Xiuwen Industrial Park (Guizhou Xiuwen Economic Development Zone)	Guizhou	Guiyang	Provincial level	Chemical industry	Pharmaceutical R&D and process; new materials; equipment and machinery manufacturing
260	Wanshan Transformation Industrial Park	Guizhou	Tongren	-	Chemical industry	Chemical industry; new materials; light industry
261	Songtao Miao Autonomous County Industrial Park	Guizhou	Tongren	-	Metallurgy	Metal electrolytic manganese; manganese ore; manganese carbonate powder manufacturing
262	Bijiang Economic Development Zone	Guizhou	Tongren	-	Others	Electricity; specialty food manufacturing; building materials industry
263	Yuping Yi Autonomous County undertakes the transfer of industrial parks	Guizhou	Tongren	-	Metallurgy	Metallurgy; chemical industry; building materials industry
264	Guizhou Dalong Economic Development Zone	Guizhou	Tongren	Provincial level	Chemical industry	Ferroalloy; chemical; light industry
265	Dejiang Economic Development Zone	Guizhou	Tongren	-	Industrial and agricultural composites	Equipment manufacturing; building materials; specialty products manufacturing
266	Guizhou Yinjiang Economic Development Zone	Guizhou	Tongren	-	Light industry	Food; electronics; light industry
267	Sinan County Industrial Park	Guizhou	Tongren	-	Comprehensive	Building materials; agricultural and sideline products processing; equipment manufacturing
268	Jiangde County Kaide Characteristic Industrial Park	Guizhou	Tongren	-	Industrial and agricultural composites	Agricultural and sideline products processing industry; tourism commodity processing industry; medical and health care processing industry
269	Shijie County Industrial Park (Dalong Economic Development Zone Shijie Industrial Park)	Guizhou	Tongren	-	Comprehensive	Building materials; specialty foods; liquor manufacturing
270	Yanhe Economic Development Zone	Guizhou	Tongren	-	Others	Building materials; energy; minerals
271	Guizhou Furui Economic Development Zone	Guizhou	Kaili	-	Metallurgy	Coal-electric aluminum, silicon-manganese alloy; new building materials; equipment manufacturing
272	Guizhou Kaili Economic Development Zone	Guizhou	Kaili	Provincial level	Machinery and equipment	Biopharmaceutical; electronics industry; equipment manufacturing
273	Guizhou Yugong Economic Development Zone	Guizhou	Southeast Miao and Dong Autonomous Prefecture	-	Metallurgy	Metallurgy; building materials; specialty food manufacturing
274	Tianzhu Industrial Park	Guizhou	Southeast Miao and Dong Autonomous Prefecture	-	Chemical industry	Metal bismuth chemical industry
275	Guizhou Jinping Economic Development Zone	Guizhou	Southeast Miao and Dong Autonomous Prefecture	-	Industrial and agricultural composites	Wood; stone; building materials
276	Liping Economic Development Zone	Guizhou	Southeast Miao and Dong Autonomous Prefecture	-	Industrial and agricultural composites	Bamboo and wood building materials; specialty foods; ferroalloys and industrial silicon; electronics and next-generation information technology; agricultural products deep processing industry
277	Guizhou Taijiang Economic Development Zone	Guizhou	Southeast Miao and Dong Autonomous Prefecture	-	Metallurgy	Lead-acid battery and recycled lead industry; multi-metal comprehensive recycling industry
278	Jianhe Industrial Park	Guizhou	Southeast Miao and Dong Autonomous Prefecture	-	Industrial and agricultural composites	Agriculture and forestry product processing; chemical industry; food processing
279	Guizhou Danzhai Jinzhong Industrial Park	Guizhou	Southeast Miao and Dong Autonomous Prefecture	Provincial level	Machinery and equipment	Equipment manufacturing industry; ecological specialty food; big health industry
280	Zhongshan Economic Development Zone (Hongqiao New District)	Guizhou	Liupanshui	Provincial level	Comprehensive	Building materials industry; food processing industry; manufacturing
281	Guizhou Panbei Economic Development Zone (Jingchangping Baiguo Industrial Park)	Guizhou	Liupanshui	-	Comprehensive	Electricity; chemical industry; building materials
282	Guizhou Shuicheng Economic Development Zone (Dongdi Park)	Guizhou	Liupanshui	-	Comprehensive	Coal and coal chemical; building materials; aluminum and aluminum processing
283	Guizhou Liuzhi Economic Development Zone (Yanjiao Park)	Guizhou	Liupanshui	-	Machinery and equipment	Energy and electricity; specialty food processing; new materials
284	Liupanshui Dahe Economic Development Zone	Guizhou	Liupanshui	-	Chemical industry	Coal; building materials; processing
285	Liupanshui Shuiyue Industrial Park	Guizhou	Liupanshui	-	Metallurgy	Steel; manufacturing; information industry
286	Guizhou Jinsha Economic Development Zone	Guizhou	Bijie	-	Comprehensive	Specialty food industry; new building materials industry; high-tech industry
287	Ziyun Industrial Park	Guizhou	Anshun	-	Building materials	Building materials; chemical industry; specialty product manufacturing
288	Zhenning Autonomous County Industrial Park	Guizhou	Anshun	-	Light industry	Stone; paper industry; textile manufacturing
289	Puding Circular Economy Industrial Base	Guizhou	Anshun	-	Building materials	Coal and electricity integration; modern logistics industry
290	Liyang High-tech Zone	Guizhou	Anshun	-	Machinery and equipment	Equipment manufacturing and energy energy processing industry
291	Anshun Xixiu District Industrial Park	Guizhou	Anshun	-	Comprehensive	New building materials; big health industry; equipment manufacturing
292	Shangyu Autonomous County Shangyu Industrial Park	Guizhou	Zunyi	-	Comprehensive	Medical health; electronic information; green food and featured light industry
293	Guizhou Renhuai Economic Development Zone	Guizhou	Renhuai	-	Others	Wine industry
294	Guizhou Gaoshan New District	Guizhou	Renhuai	-	High technology	Electronic information industry; automobile and motorcycle supporting manufacturing; new materials
295	Guizhou Lushanguan Economic Development Zone (Tonglu Coal-Electrification Industrial Park)	Guizhou	Renhuai	-	Comprehensive	Chemical industry; power industry; aluminum, titanium and processing; electronics industry
296	Guizhou Xishui Economic Development Zone	Guizhou	Zunyi	-	Others	Liquor manufacturing
297	Guizhou Chishui Economic Development Zone	Guizhou	Zunyi	-	Industrial and agricultural composites	Bamboo wood; chemical industry; special food force processing
298	Guizhou Fenggang Economic Development Zone (Fenggang Organic Eco-industrial Park)	Guizhou	Zunyi	-	Industrial and agricultural composites	Intensive processing of organic agricultural products (livestock and poultry products); building materials
299	Guizhou Honghuagang Economic Development Zone	Guizhou	Zunyi	-	Machinery and equipment	Equipment manufacturing; electronic information; upgrading of traditional industries
300	Zunyi Economic and Technological Development Zone	Guizhou	Zunyi	National level	Comprehensive	Equipment manufacturing; characteristic light industry; electronic information; grain and oil; agricultural and sideline products processing industry
301	Guizhou Puyang Economic Development Zone	Guizhou	Zunyi	-	Comprehensive	Circular economy industry
302	Zunyi Wuzhengdao Coal and Aluminum Cycle Economy Industrial Park	Guizhou	Zunyi	-	Comprehensive	Aluminum industry; green food manufacturing; medical health
303	Yuqing County Industrial Park	Guizhou	Zunyi	-	Light industry	Healthy food; big data (electronic information); fireworks
304	Guizhou Zheng'an Economic Development Zone	Guizhou	Zunyi	-	Industrial and agricultural composites	Musical instrument manufacturing; electronic information; agricultural special product processing industry
305	Guizhou Hanjiang Economic Development Zone	Guizhou	Zunyi	-	Comprehensive	Information service industry
306	Guizhou Peace (Yaxi) Park	Guizhou	Zunyi	-	Building materials	Equipment manufacturing; energy and building materials; distiller's cycle economy
307	Guizhou Qingshuihe Economic Development Zone	Guizhou	Xingyi	-	Others	Energy; building materials; chemical industry
308	Xingyi Weishe Industrial Park	Guizhou	Xingyi	-	Chemical industry	Coal char; smelting; logistics
309	Xingren County Industrial Park	Guizhou	Southwest Guizhou Autonomous Prefecture	-	Light industry	Textile and garment; coal-electricity aluminum and coal-electricity; agricultural special product processing industry
310	Pu'an County Industrial Park	Guizhou	Southwest Guizhou Autonomous Prefecture	-	Comprehensive	Coal processing and coal-electricity integration circular economy; small and medium-sized, production, light industry; smelting, energy carrying, building materials, stone processing and new chemical industry
311	Zhenfeng County Industrial Park	Guizhou	Southwest Guizhou Autonomous Prefecture	-	Comprehensive	Coking industry
312	Ceheng County Industrial Park	Guizhou	Southwest Guizhou Autonomous Prefecture	-	Building materials	Building materials; agricultural special products; gold industry
313	Hongxing Light Industrial Park	Guizhou	Southwest Guizhou Autonomous Prefecture	-	Light industry	Agricultural specialty products; building materials; chemical industry
314	Zheng Luwan Industrial Park	Guizhou	Southwest Guizhou Autonomous Prefecture	-	Machinery and equipment	New energy vehicle; logistics; leisure
315	Top effect economic development zone	Guizhou	Southwest Guizhou Autonomous Prefecture	National level	Comprehensive	Industry; agriculture; education
316	Longli Industrial Park (Economic Development Zone)	Guizhou	Buyi and Miao Autonomous Prefecture of QianNan	Provincial level	Comprehensive	Pharmaceutical industry; building materials; manufacturing
317	Luodian County Fengting Silicon System Circular Economy Industrial Park	Guizhou	Buyi and Miao Autonomous Prefecture of QianNan	-	Chemical industry	Silicon industry
318	Changshun Weiyuan Industrial Park	Guizhou	Buyi and Miao Autonomous Prefecture of QianNan	-	Comprehensive	Equipment manufacturing industry; food and drug manufacturing industry; trade logistics; new building materials
319	Guizhou Dushan Economic Development Zone	Guizhou	Buyi and Miao Autonomous Prefecture of QianNan	-	High technology	New materials, new energy; equipment manufacturing
320	Dushan County Jichang New District	Guizhou	Buyi and Miao Autonomous Prefecture of QianNan	-	Industrial and agricultural composites	Fruit and vegetable; Chinese herbal medicine
321	Dushan High-tech Industrial Park	Guizhou	Buyi and Miao Autonomous Prefecture of QianNan	-	Comprehensive	Metallurgy; high-tech product development, processing, sales; modern logistics
322	Haikou National High-tech Zone	Hainan	Haikou	National level	Light industry	Medicine; new energy; automobile manufacturing and spare parts
323	Yangpu Economic Development Zone	Hainan	Yangpu	National level	Chemical industry	Petrochemicals; pulp paper
324	Old Town Economic Development Zone	Hainan	Chengmai	Provincial level	High technology	New materials; agricultural and sideline products processing; electricity and new energy
325	Oriental Industrial Park	Hainan	Dongfang	-	Chemical industry	Oil and gas chemical industry; industrial energy; fine chemical industry
326	Xibaipo Economic Development Zone, Pingshan, Hebei	Hebei	Shijiazhuang	-	Comprehensive	Manufacturing industry
327	Shijiazhuang Economic and Technological Development Zone	Hebei	Shijiazhuang	National level	High technology	Biomedicine; equipment manufacturing; light industrial food
328	Hebei Xingtang Economic Development Zone	Hebei	Shijiazhuang	-	High technology	High-end equipment manufacturing; new materials and energy conservation; life and health industry
329	Hebei Jinzhou Economic Development Zone	Hebei	Shijiazhuang	-	Chemical industry	Fine chemical industry; equipment manufacturing
330	Jinzhou Chaoyang Economic Development Zone	Hebei	Shijiazhuang	-	Comprehensive	Textile; equipment manufacturing; chemical industry
331	Hebei Yucheng Economic Development Zone	Hebei	Shijiazhuang	-	Comprehensive	Equipment manufacturing; characteristic textile; fine chemical industry
332	Hebei Shijiazhuang Equipment Manufacturing Industrial Park	Hebei	Shijiazhuang	-	Machinery and equipment	Equipment manufacturing; biomedicine; aerospace
333	Hebei Yucheng Economic Development Zone	Hebei	Shijiazhuang	-	Industrial and agricultural composites	Modern Chinese medicine; biomedicine
334	Hebei Shenze Economic Development Zone	Hebei	Shijiazhuang	-	Chemical industry	Pharmaceutical and chemical engineering; equipment manufacturing; new materials
335	Hebei Xinle Economic Development Zone	Hebei	Shijiazhuang	-	Chemical industry	Medicine; chemical; food processing
336	Shijiazhuang Circular Chemical Industry Park	Hebei	Shijiazhuang	-	Chemical industry	Petrochemical, coal chemical, chlor-alkali chemical industry
337	Hebei Promise Economic Development Zone Leather Park	Hebei	Shijiazhuang	-	Light industry	manufacturing
338	Chengde Liugou Emerging Industry Cluster (Chengde Liugou High-tech Industrial Development Zone)	Hebei	Chengde	-	Comprehensive	High-end equipment manufacturing; new materials; energy saving and environmental protection
339	Longhua Economic Development Zone	Hebei	Chengde	-	Building materials	Food processing industry; green building materials
340	Hebei Muping Economic Development Zone	Hebei	Chengde	-	Metallurgy	Iron mining
341	Chengde Zhangbaiwan High-tech Industrial Development Zone	Hebei	Chengde	-	High technology	Food and medicine; equipment manufacturing; new material manufacturing
342	Pingquan Huizhou Economic Development Zone	Hebei	Chengde	-	Light industry	Food processing; chemical industry; machinery manufacturing
343	Hebei Weichang Economic Development Zone	Hebei	Chengde	-	Comprehensive	Clean energy; silica sand casting; food and drug; comprehensive utilization of tailings
344	Hebei Yuxian Economic Development Zone	Hebei	Zhangjiakou	-	High technology	Modern logistics; biological industry
345	Zhangjiakou Xishan High-tech Industrial Development Zone	Hebei	Zhangjiakou	-	Machinery and equipment	Technology research and development; equipment manufacturing
346	Nanshan Economic Development Zone, Zhangjiakou, Hebei	Hebei	Zhangjiakou	-	Machinery and equipment	Manufacturing; new building materials; green food; clean energy
347	Hebei Wanquan Economic Development Zone	Hebei	Zhangjiakou	-	Comprehensive	Equipment Manufacturing
348	Mountain Temple Recycling Economy Demonstration Park	Hebei	Qinhuangdao	-	Comprehensive	High-end equipment R & D and manufacturing; energy-saving and environmentally friendly new energy industry; information and communication industry
349	Hebei Fengnan Economic Development Zone	Hebei	Tangshan	Provincial level	Machinery and equipment	Special cable; equipment manufacturing; light industry food manufacturing
350	Hebei Fengnan Xiaoji Economic Development Zone	Hebei	Tangshan	-	Metallurgy	Steel and deep processing industry
351	Caofeidian Circular Economy Demonstration Zone	Hebei	Tangshan	National level	Metallurgy	steel industry
352	Tangshan Port Economic Development Zone	Hebei	Tangshan	Provincial level	Chemical industry	Coal chemical industry
353	Tangshan Hanyu Economic Development Zone	Hebei	Tangshan	-	Comprehensive	Food manufacturing; professional equipment manufacturing; non-metallic mineral products manufacturing
354	Tangshan Kaiping High-tech Industrial Development Zone	Hebei	Tangshan	-	Machinery and equipment	Equipment manufacturing
355	Hebei Leting Economic Development Zone	Hebei	Tangshan	-	Metallurgy	Steel; chemical industry; equipment manufacturing
356	Hebei Tangshan Lutai Economic Development Zone	Hebei	Tangshan	-	Machinery and equipment	Bicycle parts; new heating radiator; steel wood leisure furniture manufacturing
357	Weinan Chengxi Economic Development Zone	Hebei	Tangshan	-	Metallurgy	Metal deep processing; equipment manufacturing; modern light industry
358	Weinan Economic Development Zone	Hebei	Tangshan	Provincial level	Machinery and equipment	Recycling resource utilization; equipment manufacturing; food processing
359	Sijiaying Economic Development Zone, Ganyu County, Hebei Province	Hebei	Tangshan	-	Machinery and equipment	Equipment manufacturing industry; fine steel industry; ecological mining industry
360	Hebei Tangshan Nanbao Economic Development Zone	Hebei	Tangshan	Provincial level	Chemical industry	Chemical industry
361	Hebei Qian'an Economic Development Zone	Hebei	Tangshan	-	Metallurgy	Iron and steel metallurgy industry; equipment manufacturing industry; coal chemical industry
362	Hebei Qianxi Economic Development Zone	Hebei	Tangshan	-	Metallurgy	Steel; casting; iron selection
363	Hebei Zunhua Economic Development Zone	Hebei	Tangshan	-	Comprehensive	Equipment manufacturing; food processing; new building materials
364	Tangshan High-tech Industrial Development Zone	Hebei	Tangshan	National level	Machinery and equipment	Welding industry; robot; auto parts
365	Hebei Yutian Industrial Park	Hebei	Tangshan	-	Comprehensive	Equipment manufacturing; electronics; medicine
366	Yutian Economic Development Zone	Hebei	Tangshan	-	Comprehensive	Steel deep processing; building materials; chemical industry
367	Hebei Tangshan Guye Economic Development Zone	Hebei	Tangshan	-	Metallurgy	Steel; coking; cement
368	Hebei Qian'an Eastern Economic Development Zone	Hebei	Tangshan	-	Machinery and equipment	Equipment manufacturing; food and pharmaceutical; characteristic light industry
369	Hebei Anguo Modern Chinese Medicine Industrial Park	Hebei	Baoding	-	Others	General equipment manufacturing industry; pharmaceutical manufacturing industry
370	Hebei Boye Economic Development Zone	Hebei	Baoding	-	Others	Rubber belt
371	Gaobeidian Economic Development Zone	Hebei	Baoding	-	Comprehensive	Automobile manufacturing; food and beverage; energy-saving building materials
372	Gaoyang Economic Development Zone	Hebei	Baoding	-	Light industry	Textile industry
373	Hebei Wuyuan Economic Development Zone	Hebei	Baoding	-	Metallurgy	Iron and steel smelting; iron ore selection; electricity
374	Mancheng Economic Development Zone	Hebei	Baoding	-	Light industry	Papermaking; food manufacturing
375	Hebei Qingyuan Economic Development Zone	Hebei	Baoding	-	Metallurgy	Deep processing of auto parts and non-ferrous metals; textile industry; electrical machinery and equipment manufacturing
376	Tangxian Economic Development Zone	Hebei	Baoding	-	Comprehensive	Machinery manufacturing; building materials; handicraft processing manufacturing
377	Hebei Xiongxian Economic Development Zone	Hebei	Baoding	-	Others	light industry
378	Yixian Economic Development Zone	Hebei	Baoding	-	Building materials	Building materials; electronics; food processing industry
379	Songlindian Economic Development Zone	Hebei	Baoding	-	Machinery and equipment	High-end equipment manufacturing; auto parts manufacturing
380	Zhangzhou Lingang Economic and Technological Development Zone	Hebei	Cangzhou	National level	Chemical industry	Chemical industry; salt chemical industry; coal chemical industry
381	Hebei Renqiu Economic Development Zone	Hebei	Cangzhou	Provincial level	Chemical industry	Petrochemical; electronic communication; mechanical equipment manufacturing
382	Hebei Botou Economic Development Zone	Hebei	Cangzhou	-	Machinery and equipment	Mechanical manufacturing; mechanical manufacturing; machinery manufacturing
383	Hebei Mengcun Economic Development Zone	Hebei	Cangzhou	-	Machinery and equipment	Equipment manufacturing
384	Hebei Hejian Yingzhou Economic Development Zone	Hebei	Cangzhou	-	Comprehensive	Wire and cable; machinery manufacturing; information equipment industry
385	Renqiu Yanling Industrial Park	Hebei	Cangzhou	-	Metallurgy	Aluminum profiles; motorcycle sprocket; oil drilling equipment and petrochemical industry
386	Hebei Dongguang Economic Development Zone	Hebei	Cangzhou	-	Comprehensive	Chemical industry; plastics; equipment manufacturing
387	Hebei Suning Economic Development Zone	Hebei	Cangzhou	-	Light industry	Fur industry; curb economy; equipment manufacturing
388	Hebei Wuqiao Economic Development Zone	Hebei	Cangzhou	-	Machinery and equipment	Mechanical equipment manufacturing; auto parts; rubber and rubber
389	Hebei Hejian Economic Development Zone	Hebei	Cangzhou	-	Chemical industry	Chemical industry; new materials; machinery manufacturing
390	Hebei Feixiang Economic Development Zone	Hebei	Handan	-	Machinery and equipment	Equipment manufacturing; trade logistics
391	Hebei Hao Industrial Park	Hebei	Handan	Provincial level	Comprehensive	Equipment manufacturing; medicine; new materials
392	Jixian Agricultural Products Processing Park	Hebei	Handan	-	Industrial and agricultural composites	Agriculture; agricultural and sideline products processing; warehousing and logistics
393	Hebei Cixian Economic Development Zone	Hebei	Handan	-	Chemical industry	Circular economy coal chemical industry; basic equipment manufacturing; new materials; new building materials
394	Cheng'an County Economic Development Zone	Hebei	Handan	-	Machinery and equipment	Equipment manufacturing; building materials
395	Cheng'an County Mall Industrial Zone	Hebei	Handan	-	Machinery and equipment	Equipment manufacturing; building materials
396	Fengfeng Economic Development Zone	Hebei	Handan	-	Comprehensive	Coal chemical industry; steel; building materials industry
397	Hebei Guangping Economic Development Zone	Hebei	Handan	-	Industrial and agricultural composites	Green food; new building materials; equipment manufacturing
398	Lushan Economic Development Zone	Hebei	Handan	-	High technology	Logistics; trade; transportation
399	Hebei Shexian Economic Development Zone	Hebei	Handan	Provincial level	Comprehensive	Electric energy; equipment manufacturing; food processing industry
400	Hebei Guantao New Chemical Industrial Park	Hebei	Handan	-	Chemical industry	Pesticide intermediates; fine chemicals
401	Hebei Jize Economic Development Zone	Hebei	Handan	-	Comprehensive	Casting; cotton spinning; food processing industry
402	Hebei Guangzong Economic Development Zone	Hebei	Xingtai	-	Machinery and equipment	Self-phase car; equipment manufacturing; agricultural and sideline deep processing industry
403	Hebei Neiqiu Industrial Park	Hebei	Xingtai	-	Chemical industry	New chemical industry; equipment manufacturing; food processing industry
404	Hebei Pingxiang Bicycle Industrial Park	Hebei	Xingtai	-	Others	Bicycle, baby carriage, spare parts processing industry
405	Weixian Economic Development Zone Management Committee	Hebei	Xingtai	-	Comprehensive	Electronic information; automobiles and parts; agricultural products deep processing industry
406	Hebei Lincheng Economic Development Zone	Hebei	Xingtai	-	Comprehensive	Pharmaceutical manufacturing; non-metal manufacturing; general equipment manufacturing
407	Xingtai Economic Development Zone	Hebei	Xingtai	Provincial level	Comprehensive	Advanced manufacturing; new energy; service industry
408	Hebei Shahe Lishui Economic Development Zone	Hebei	Xingtai	-	Machinery and equipment	Equipment manufacturing industry; new materials; new energy
409	Hebei Julu Economic Development Zone	Hebei	Xingtai	-	Comprehensive	Equipment manufacturing industry; cotton textile manufacturing industry; food processing industry
410	Renxian Energy Saving and Environmental Protection Industrial Park	Hebei	Xingtai	-	Machinery and equipment	Machinery manufacturing
411	Dacaozhuang Management District Industrial Cluster	Hebei	Xingtai	-	Chemical industry	Equipment manufacturing industry; pharmaceutical and chemical industry; modern agriculture
412	Zhengzhou High-tech Industrial Development Zone	Henan	Zhengzhou	National level	High technology	Instrumentation manufacturing industry; computer, communications and other electronic equipment manufacturing; software and information technology services
413	Pingdingshan Chemical Industry Cluster Area	Henan	Pingdingshan	-	Chemical industry	Nylon chemical industry
414	Wugang Industrial Cluster	Henan	Pingdingshan	-	Machinery and equipment	Special steel production, machinery manufacturing; textile and garment processing industry
415	Pingdingshan City Jixian Industrial Cluster Area	Henan	Pingdingshan	-	Machinery and equipment	Mechanical equipment manufacturing industry; pharmaceutical industry
416	Pingdingshan Shilong Industrial Cluster Area	Henan	Pingdingshan	-	Chemical industry	Modern coal chemical industry; new building materials
417	Weihui City Industrial Cluster	Henan	Xinxiang	-	Light industry	Food and beverage and packaging and new building materials
418	Fengqiu County Environmental Sanitation (lifting) industrial cluster	Henan	Xinxiang	-	Machinery and equipment	Sanitation
419	Henan Catering Central Kitchen Industry Park	Henan	Xinxiang	-	Others	Food industry
420	Yanjin County Industrial Cluster Area	Henan	Xinxiang	-	Comprehensive	Food processing industry; energy saving and environmental protection
421	Xinxiang Xinya Paper Products Industrial Park	Henan	Xinxiang	-	Light industry	Manufacturing industry
422	Luoning County Industrial Cluster Area	Henan	Luoyang	-	Comprehensive	Light industry manufacturing; non-ferrous metal deep processing industry
423	Yiyang County Industrial Cluster	Henan	Luoyang	-	Machinery and equipment	Equipment manufacturing; food industry; electronics
424	Luoyang Yibin Industrial Cluster Area	Henan	Luoyang	-	Machinery and equipment	High-end equipment manufacturing; new materials
425	Cangzhou Industrial Cluster Area	Henan	Xuchang	-	Machinery and equipment	Equipment manufacturing; medicine
426	Changge City Recycled Metal Recycling Industry Cluster Area	Henan	Xuchang	-	Others	Recycled metal
427	Liling County Industrial Cluster	Henan	Xuchang	-	Light industry	Textile bags; equipment manufacturing; food and beverage manufacturing
428	Queshan County industrial cluster	Henan	Zhumadian	-	Building materials	Building materials; biotechnology
429	Yinan County Industrial Cluster Area	Henan	Zhumadian	-	Machinery and equipment	Electric vehicle manufacturing industry; building materials
430	Xiping County Industrial Cluster	Henan	Zhumadian	-	Industrial and agricultural composites	Agricultural product processing industry; machinery manufacturing
431	Zhumadian equipment industry gathering area	Henan	Zhumadian	-	Machinery and equipment	Equipment manufacturing industry; food processing industry
432	Pingyi County Industrial Cluster Area	Henan	Zhumadian	-	Light industry	Leather manufacturing; electronics industry
433	Shangcai County Industrial Cluster Area	Henan	Zhumadian	-	Light industry	Agricultural and sideline products processing industry; clothing and apparel production industry
434	Gushi County Shihewan Industrial Cluster Area	Henan	Xinyang	-	Light industry	Bamboo and wood home manufacturing industry; food processing industry
435	Huaxian County Industrial Cluster	Henan	Xinyang	-	Comprehensive	Food processing industry; equipment manufacturing industry; coal chemical industry
436	Huixian City Industrial Cluster Area	Henan	Xinxiang	-	Machinery and equipment	Mechanical equipment industry; textile and garment industry
437	Luanping County Industrial Cluster Area	Henan	Zhumadian	-	Industrial and agricultural composites	Agricultural and sideline products processing; equipment manufacturing
438	Xinlianxin Modern Coal Chemical Industry Circular Economy Industrial Park	Henan	Xinxiang	-	Chemical industry	Coal chemical industry; battery manufacturing
439	Xinxiang Chemical and Physical Power Industry Park	Henan	Xinxiang	-	Others	Battery manufacturing
440	Plain demonstration area	Henan	Xinxiang	-	Comprehensive	Printing and packaging industry; electronic information industry; big health industry
441	Ezhou Economic Development Zone	Hubei	Ezhou	-	Comprehensive	Metallurgy industry; equipment manufacturing industry; plastic pipe manufacturing industry
442	Hubei Public Security Economic Development Zone	Hubei	Jingzhou	Provincial level	Building materials	Biomedicine; auto parts manufacturing; chemical building materials manufacturing
443	Songzi Economic Development Zone, Hubei Province	Hubei	Jingzhou	-	Light industry	Chemical industry; liquor brewing industry; machinery manufacturing industry
444	Hubei Jianli Economic Development Zone	Hubei	Jingzhou	Provincial level	Light industry	Textile and garment industry; light industry food industry; pharmaceutical industry
445	Hubei Shishou Economic Development Zone	Hubei	Jingzhou	Provincial level	Chemical industry	Fine chemicals; auto parts manufacturing; wood industry
446	Shashi Economic Development Zone	Hubei	Jingzhou	-	Comprehensive	Pharmaceutical and chemical industry; electromechanical auto parts manufacturing; food and feed manufacturing
447	Wuhan Economic and Technological Development Zone (Xintan New District)	Hubei	Jingzhou	-	Comprehensive	Auto parts manufacturing industry; pharmaceutical and chemical industry; new building materials
448	Yingshan Economic Development Zone	Hubei	Huanggang	-	Building materials	Automobile and ship fittings manufacturing industry; building materials; Chinese herbal medicines and agricultural and sideline products processing industry
449	Hubei Huangmei Economic Development Zone (Dasheng Guanshan Industrial Park)	Hubei	Huanggang	-	Comprehensive	Textile and garment industry; agricultural and sideline products processing industry; electronic information industry
450	Macheng Economic Development Zone	Hubei	Huanggang	Provincial level	Metallurgy	Metallurgical machinery industry; auto parts processing industry; light industry food industry
451	Two Types Social Construction Circular Economy Experimental Area in Tian Town, Wuxue City	Hubei	Huanggang	-	Chemical industry	Building materials; pharmaceutical and chemical industry
452	Hubei Longgan Lake Industrial Park	Hubei	Huanggang	-	Light industry	Textile and garment; agricultural product processing; pharmaceutical and chemical industry
453	Hubei Tuanfeng Economic Development Zone	Hubei	Huanggang	Provincial level	Building materials	Steel construction materials; deep processing of agricultural and sideline products; textile and garment processing industry
454	Qianjiang Economic Development Zone	Hubei	Qianjiang	Provincial level	Chemical industry	Chemical industry
455	Garden Economic Development Zone	Hubei	Qianjiang	-	Industrial and agricultural composites	Machinery; textile; agricultural product processing industry
456	Zhang Jin Industrial Park	Hubei	Qianjiang	-	Metallurgy	Aluminum electricity; clothing
457	Shiyan Economic and Technological Development Zone	Hubei	Shiyan	National level	Machinery and equipment	Automobile manufacturing and parts manufacturing; biomedicine; recycling economy and environmental protection industry
458	Puyang Economic Development Zone	Hubei	Shiyan	-	Machinery and equipment	Automobile and parts manufacturing; new building materials; agricultural products processing industry
459	Danjiangkou Economic Development Zone	Hubei	Shiyan	-	Light industry	Auto parts manufacturing industry; agricultural and sideline food processing industry; beverage manufacturing industry
460	Luxi County Industrial Park	Hubei	Shiyan	-	Comprehensive	Auto parts manufacturing; building materials; agricultural and sideline products processing industry
461	Fangxian Industrial Park	Hubei	Shiyan	-	Comprehensive	Biomedicine; auto parts manufacturing; agricultural product processing industry
462	Zhuxi County Industrial Park	Hubei	Shiyan	-	Industrial and agricultural composites	Agricultural product processing industry; electronic processing industry
463	Zhushan County Economic Development Zone	Hubei	Shiyan	-	Others	Agricultural product processing industry; turquoise processing industry
464	Hubei Jiayu Economic Development Zone	Hubei	Xianning	Provincial level	Comprehensive	Light industry textile manufacturing; pipe processing industry; new energy, new material manufacturing; food processing industry
465	Hubei Xian'an Economic Development Zone	Hubei	Xianning	-	Machinery and equipment	Electromechanical manufacturing; forestry building materials; hemp textile industry
466	Hubei Chongyang Economic Development Zone	Hubei	Xianning	-	Comprehensive	Vanadium industry; building materials and chemicals; textile and sanitary materials manufacturing
467	Hubei Tongshan Economic Development Zone	Hubei	Xianning	-	Building materials	Metallurgical building materials; machinery; electronic information industry
468	Hubei Chibi Pufang Industrial Park	Hubei	Xianning	-	Light industry	Textile; printing and dyeing; garment manufacturing
469	Xiaogan High-tech Industrial Development Zone	Hubei	Xiaogan	National level	Machinery and equipment	Optoelectronic information; high-end equipment manufacturing; automotive and parts manufacturing
470	Hubei Hanchuan Economic Development Zone	Hubei	Xiaogan	Provincial level	Light industry	Food packaging; energy building materials; textile and garment manufacturing
471	Yunmeng Economic Development Zone	Hubei	Xiaogan	Provincial level	Light industry	Salt and salt chemical industry; manufacturing of high-tech materials and optoelectronic products; traditional food, machinery and textile and garment manufacturing
472	Dongcheng Industrial Park, Hubei Economic and Technological Development Zone	Hubei	Xiaogan	Provincial level	Chemical industry	Salt chemical
473	Yingfu Industrial Park, Yingcheng Economic Development Zone	Hubei	Xiaogan	Provincial level	Chemical industry	Fine Chemicals
474	Yingli Economic and Technological Development Zone, Si Li Xiang Salt Chemical Industrial Park	Hubei	Xiaogan	Provincial level	Comprehensive	Chemical industry
475	Hubei Xiaonan Economic Development Zone	Hubei	Xiaogan	Provincial level	Light industry	Paper industry; industrial and agricultural waste treatment; food and beverage manufacturing
476	Zhijiang Anfu Temple Industrial Park	Hubei	Yichang	-	Industrial and agricultural composites	Agricultural product processing industry; food machinery industry; food packaging industry
477	Yaojiagang Chemical Industrial Park, Zhijiang Economic Development Zone, Hubei	Hubei	Yichang	-	Chemical industry	Chemical fertilizers and chemical raw materials; fine chemicals (new materials); chemical equipment and professional logistics
478	Hubei Yidu Industrial Park	Hubei	Yichang	Provincial level	Comprehensive	Fine chemicals; new equipment manufacturing; new electronics manufacturing
479	Hubei Dangyang Economic Development Zone	Hubei	Yichang	Provincial level	Comprehensive	Building materials; chemical industry; food manufacturing
480	Hubei Yuan'an Industrial Park	Hubei	Yichang	-	Chemical industry	Phosphorus chemical industry; food and pharmaceutical manufacturing industry; new building materials manufacturing industry
481	Hubei Zigui Economic Development Zone	Hubei	Yichang	Provincial level	Light industry	Opto-mechatronics manufacturing; textile and apparel manufacturing; food processing industry
482	Hubei Xingshan Economic Development Zone	Hubei	Yichang	-	Chemical industry	Phosphorus silicon chemical industry; agricultural special processing; stone building materials
483	Hubei Changyang Economic Development Zone	Hubei	Yichang	Provincial level	Light industry	Healthy food manufacturing; new building materials; green mining
484	Hubei Wufeng Industrial Park	Hubei	Yichang	-	Industrial and agricultural composites	Agriculture and forestry products processing industry; machinery manufacturing industry
485	Hubei Wufeng National Industrial Park	Hubei	Yichang	-	Light industry	Jewelry; abrasive manufacturing; equipment manufacturing
486	Yiling Economic Development Zone	Hubei	Yichang	Provincial level	Light industry	Electromechanical packaging industry; food and medicine; chemical building materials
487	Longquan Food Industrial Park, Yiling Economic Development Zone, Hubei	Hubei	Yichang	Provincial level	Light industry	Food processing industry
488	Yuting Park, Yichang Economic Development Zone, Hubei	Hubei	Yichang	National level	Chemical industry	Chemical industry; equipment manufacturing industry; electronics manufacturing
489	Wujiagang Industrial Park, Hubei	Hubei	Yichang	Provincial level	High technology	Bio-food manufacturing; equipment manufacturing; optoelectronic information industry
490	Hubei Dianjun Industrial Park	Hubei	Yichang	-	Machinery and equipment	Electronic materials manufacturing industry; electronic equipment industry; supporting industry
491	Yichang National High-tech Zone Technology Industry Development Zone	Hubei	Yichang	National level	Comprehensive	Equipment manufacturing industry; biomedicine; fine chemicals
492	Hubei Xiling Economic Development Zone	Hubei	Yichang	-	High technology	Urban industry; trade logistics
493	Jingmen High-tech Industrial Park	Hubei	Jingmen	National level	Comprehensive	Chemical industry; renewable resource utilization and environmental protection; equipment manufacturing
494	Jingshan Economic Development Zone	Hubei	Jingmen	Provincial level	Machinery and equipment	Equipment manufacturing industry; agricultural product processing industry
495	Hubei Shayang Economic Development Zone	Hubei	Jingmen	Provincial level	Industrial and agricultural composites	New building materials; agricultural product processing industry; automobile manufacturing
496	Hubei Zhongxiang Economic Development Zone	Hubei	Jingmen	Provincial level	Industrial and agricultural composites	Agricultural product processing industry; equipment manufacturing industry; biomedicine
497	Zhongxiang City Huxiang Economic Development Zone	Hubei	Jingmen	-	Chemical industry	Phosphorus chemical industry; new building materials
498	Dongbao Industrial Park	Hubei	Jingmen	-	Comprehensive	Forest industry; electronics manufacturing; machinery manufacturing; building materials
499	Hubei Qujialing Economic Development Zone	Hubei	Jingmen	-	Industrial and agricultural composites	Agricultural product processing industry; mechanical equipment manufacturing industry; technological innovation
500	Zhangzhou Industrial Park	Hubei	Xiangyang	-	Industrial and agricultural composites	Agricultural product processing industry
501	Zaoyang Economic Development Zone	Hubei	Xiangyang	Provincial level	Comprehensive	Automobile and parts manufacturing; fine chemicals; light industrial textile manufacturing
502	Zaoyang Wudian Industrial Park	Hubei	Xiangyang	-	Industrial and agricultural composites	Deep processing of agricultural products; auto parts manufacturing; textile manufacturing
503	Hubei Fancheng Economic Development Zone	Hubei	Xiangyang	Provincial level	Light industry	Chemical fiber manufacturing; cotton textile manufacturing
504	Fuyang Aerospace Industrial Park	Hubei	Xiangyang	-	Machinery and equipment	Aerospace; equipment manufacturing; electrical and electronic industry
505	Nanxun Economic Development Zone	Hubei	Xiangyang	-	Comprehensive	New building materials; mechanical and electronic industry; phosphorus chemical industry
506	Gucheng Economic Development Zone	Hubei	Xiangyang	Provincial level	Comprehensive	Develop a circular economy industry based on comprehensive utilization of resources; develop a machinery manufacturing industry based on auto parts
507	Tianmen Industrial Park	Hubei	Tianmen	-	Comprehensive	Agricultural product processing industry; electromechanical auto parts industry; environmental protection new energy
508	Hubei Enshi Economic Development Zone	Hubei	Enshi	Provincial level	Industrial and agricultural composites	Tobacco processing industry; selenium-enriched agricultural products processing industry
509	Hubei Jianshi Industrial Park	Hubei	Enshi	-	Comprehensive	Photovoltaic electronics; new building materials; agricultural and sideline products processing industry
510	Hubei Badong Economic Development Zone	Hubei	Enshi	-	Comprehensive	Agriculture; industry; trade logistics
511	Hubei Badong Economic Development Zone Ecological Economic Park	Hubei	Enshi	-	High technology	Agriculture; trade logistics; tourism
512	Xuan'en County Industrial Park, Hubei	Hubei	Enshi	Provincial level	Industrial and agricultural composites	Ecological agricultural product processing industry; metal products processing industry; new energy-saving building materials industry
513	Hubei Xianfeng Industrial Park	Hubei	Enshi	-	Building materials	Building decoration materials and resource recycling industry; green food processing industry
514	Wuhan Economic and Technological Development Zone	Hubei	Wuhan	National level	Machinery and equipment	Automobile; electronic appliances; food and beverage manufacturing
515	Caidian Economic Development Zone	Hubei	Wuhan	-	Machinery and equipment	Automobile and parts processing industry; communication electronics industry; machinery manufacturing
516	Miayama Office of Jiangxia Economic Development Zone	Hubei	Wuhan	-	Machinery and equipment	Equipment manufacturing; optoelectronic information; biomedicine
517	Qingshan District Circular Economy Industrial Park Industrial Multiplier Demonstration Park	Hubei	Wuhan	-	Machinery and equipment	Comprehensive utilization of solid waste resources; high-end equipment manufacturing industry; intelligent manufacturing and e-commerce
518	Wuhan Chemical Industry Park	Hubei	Wuhan	-	Chemical industry	Petrochemical industry
519	Wujiashan Taishang Industrial Park, Wuhan	Hubei	Wuhan	Provincial level	Light industry	Food and beverage; mechatronics; biomedicine
520	Yangluo Lingang Industrial Park	Hubei	Wuhan	-	Metallurgy	Steel deep processing; equipment manufacturing; electric energy
521	Suizhou High-tech Park	Hubei	Wuhan	National level	Machinery and equipment	Chemical industry; paper industry; leather processing; food processing; automotive processing industry
522	Sui County Economic Development Zone	Hubei	Suizhou	-	Comprehensive	Agricultural product processing; special vehicle; high-tech
523	Hubei Guangshui Economic Development Zone	Hubei	Suizhou	-	Comprehensive	Fan manufacturing; plastic products; food processing industry
524	Hubei Zengdu Economic Development Zone	Hubei	Suizhou	-	Industrial and agricultural composites	Special purpose vehicle
525	Changsha (national level) Economic and Technological Development Zone	Hunan	Changsha	National level	Machinery and equipment	Construction machinery; automobile and parts manufacturing; electronic information industry
526	Changsha High-tech Zone	Hunan	Changsha	National level	Machinery and equipment	Construction machinery and advanced equipment manufacturing; electronic information industry; new material manufacturing
527	Ningxiang Economic and Technological Development Zone	Hunan	Changsha	National level	Comprehensive	Food manufacturing industry; advanced equipment manufacturing; new materials
528	Liuyang Economic and Technological Development Zone	Hunan	Changsha	National level	High technology	Biomedicine; electronic information; health food manufacturing
529	Wangcheng Economic Development Zone	Hunan	Changsha	National level	Metallurgy	Non-ferrous metal deep processing and advanced manufacturing; food processing industry; electronic information
530	Changsha Yuhua Economic Development Zone	Hunan	Changsha	Provincial level	Machinery and equipment	New energy vehicle manufacturing; intelligent equipment manufacturing (robot and robotic complete systems); tobacco manufacturing
531	Hunan Changsha Jinyun Economic Development Zone	Hunan	Changsha	Provincial level	Comprehensive	Automobile manufacturing industry; agricultural and sideline food processing industry; building materials industry
532	Ningxiang High-tech Industrial Park	Hunan	Changsha	-	Machinery and equipment	New materials; equipment manufacturing; photoelectric information
533	Liuyang Manufacturing Industry Base	Hunan	Changsha	Provincial level	Machinery and equipment	Advanced equipment manufacturing; automotive and parts; remanufacturing
534	Yuelu Industrial Concentration Zone	Hunan	Changsha	-	Others	Inspection and testing; cultural creativity; pharmaceutical logistics
535	Hunan Xiangjiang New District	Hunan	Changsha	National level	Comprehensive	Advanced equipment; new materials; light industry food processing industry
536	Yanling Industrial Concentration Zone	Hunan	Zhuzhou	-	High technology	Textile manufacturing; new materials; deep processing industry for agricultural and forestry products
537	Jianning Development Zone	Hunan	Zhuzhou	-	Light industry	Clothing manufacturing
538	Hetang Industrial Concentration Zone	Hunan	Zhuzhou	-	Metallurgy	Non-ferrous metal smelting and rolling processing industry; pharmaceutical manufacturing
539	Xiangtan National High-tech Industrial Development Zone	Hunan	Xiangtan	National level	Machinery and equipment	New energy equipment industry; advanced mining equipment industry; fine steel deep processing industry
540	Xiangtan Economic and Technological Development Zone	Hunan	Xiangtan	National level	Machinery and equipment	Automobile and parts manufacturing; electronic information; advanced equipment manufacturing
541	Hunan Xiangtan Yuetang Economic Development Zone	Hunan	Xiangtan	-	High technology	Business logistics; leisure tourism; e-commerce
542	Hunan Xiangtan Tianyi Economic Development Zone	Hunan	Xiangtan	-	Light industry	Food processing industry; general equipment manufacturing; professional equipment manufacturing
543	Lushan High-tech Industrial Development Zone	Hunan	Xiangtan	-	Machinery and equipment	Advanced equipment manufacturing industry; energy saving and environmental protection; medicine and food
544	Hunan Hengyang Pine Economic Development Zone	Hunan	Hengyang	Provincial level	Chemical industry	Salt brine chemical and fine chemicals; new materials; new energy
545	Changning Shuikoushan Economic Development Zone	Hunan	Hengyang	Provincial level	Comprehensive	Chemical industry; non-ferrous metal smelting; comprehensive utilization of waste resources recycling
546	Hengdong Economic Development Zone Management Committee	Hunan	Hengyang	-	Comprehensive	Non-ferrous metal smelting and pressing; electrical machinery and equipment manufacturing; chemical raw materials and chemicals
547	Hengnan Industrial Concentration Zone	Hunan	Hengyang	-	Machinery and equipment	Machining; food manufacturing; warehousing
548	Hengyang Xidu High-tech Industrial Park	Hunan	Hengyang	-	Machinery and equipment	Non-metallic mineral products industry; intelligent machinery manufacturing; pharmaceutical manufacturing
549	Fuyang Economic Development Zone	Hunan	Hengyang	Provincial level	Others	Industry; wholesale and retail trade; property
550	Fuyang City Circular Economy Industrial Park	Hunan	Hengyang	-	Metallurgy	Circular economy
551	Jidong Economic Development Zone	Hunan	Hengyang	-	High technology	New materials; mechanical manufacturing; electronic information
552	Baoqing Industrial Concentration Zone	Hunan	Shaoyang	-	Machinery and equipment	Advanced equipment manufacturing
553	Shaoxiang Daxiang Industrial Concentration Zone	Hunan	Shaoyang	-	Comprehensive	Non-metallic mineral products industry; automobile manufacturing industry; electric energy
554	Shaoyang Economic Development Zone	Hunan	Shaoyang	Provincial level	Light industry	Food processing industry; building materials; textile manufacturing
555	Shaodong County Economic Development Zone	Hunan	Shaoyang	National level	Light industry	Light industry
556	Xinshao Economic Development Zone	Hunan	Shaoyang	Provincial level	Light industry	Light industry; non-ferrous metal smelting
557	Dongkou Industrial Concentration Zone	Hunan	Shaoyang	Provincial level	Light industry	Agricultural and sideline food processing industry; electronics industry; bamboo and wood processing industry
558	Longhui Industrial Concentration Zone	Hunan	Shaoyang	-	Comprehensive	industry
559	Wugang Industrial Park	Hunan	Shaoyang	-	Industrial and agricultural composites	Agricultural product processing industry; electronic component manufacturing; non-metallic materials manufacturing
560	Chengbu Industrial Concentration Zone	Hunan	Shaoyang	-	Light industry	Agricultural and sideline food processing industry; bamboo and wood products processing industry
561	Suining Industrial Concentration Zone	Hunan	Shaoyang	-	Industrial and agricultural composites	Bamboo and wood deep processing industry; furniture manufacturing
562	Xinning County Industrial Concentration Zone	Hunan	Shaoyang	-	Light industry	Agricultural and sideline food processing industry; leather, fur and shoe manufacturing; electromechanical equipment manufacturing
563	Shaoyang County Industrial Concentration Zone	Hunan	Shaoyang	-	Comprehensive	Agricultural and sideline products processing industry; new materials; electrical machinery
564	Hunan Xiangyin Industrial Park	Hunan	Yueyang	Provincial level	Industrial and agricultural composites	Advanced manufacturing industry; agricultural and sideline products processing industry
565	Changde Economic and Technological Development Zone	Hunan	Changde	National level	Comprehensive	High-end equipment manufacturing; new energy and new materials; food biomedicine
566	Hunan Linyi Economic Development Zone	Hunan	Changde	Provincial level	Comprehensive	Chemical fiber manufacturing; textile industry; non-metallic mineral manufacturing
567	Hunan Shimen Economic Development Zone	Hunan	Changde	Provincial level	Industrial and agricultural composites	Electricity, heat production and supply; non-metallic mineral products industry; agricultural and sideline food processing industry
568	Hunan Jixian Economic Development Zone	Hunan	Changde	Provincial level	Industrial and agricultural composites	Pharmaceutical manufacturing; agricultural and sideline food processing industry; non-metallic mineral products industry
569	Hunan Hanshou High-tech Industrial Park	Hunan	Changde	Provincial level	Machinery and equipment	Equipment manufacturing industry; biomedical industry; fine chemical industry
570	Hunan Changde High-tech Industrial Park	Hunan	Changde	Provincial level	Machinery and equipment	Special equipment manufacturing industry; non-metallic mineral products industry
571	Hunan Anxiang Industrial Concentration Zone	Hunan	Changde	-	Comprehensive	Home building materials manufacturing; agricultural and sideline products processing; equipment manufacturing
572	Tianjin Industrial Concentration Zone	Hunan	Changde	-	Comprehensive	Biomedicine; auto parts processing industry; food processing industry
573	Hunan Taoyuan Industrial Concentration Zone	Hunan	Changde	-	Metallurgy	Non-ferrous metal smelting and rolling processing industry; agricultural and sideline food processing industry; electric power, heat production and supply industry
574	West Dongting Industrial Concentration Zone	Hunan	Changde	-	Industrial and agricultural composites	Agricultural and sideline food processing industry; electrical machinery and equipment manufacturing
575	Hunan Zhangjiajie Economic Development Zone	Hunan	Zhangjiajie	Provincial level	High technology	Tourism commodities; biomedicine; new materials
576	Hunan Cili Industrial Concentration Zone	Hunan	Zhangjiajie	Provincial level	Chemical industry	Petrochemical chemical products industry; agricultural and sideline products processing industry
577	Sangzhi Industrial Concentration Zone	Hunan	Zhangjiajie	-	Industrial and agricultural composites	Agricultural and sideline food processing industry; non-metallic mineral processing industry
578	Yiyang High-tech Industrial Development Zone	Hunan	Yiyang	National level	High technology	Electronic information; equipment manufacturing; new materials
579	Hunan Hanjiang High-tech Industrial Park	Hunan	Yiyang	-	Machinery and equipment	Equipment manufacturing industry; food processing industry; shipbuilding industry
580	Hunan Nanxian Economic Development Zone	Hunan	Yiyang	Provincial level	Light industry	Agricultural and sideline food processing; food manufacturing; textile manufacturing
581	Hunan Anhua Economic Development Zone	Hunan	Yiyang	-	Others	Recycling industry
582	Hunan Yiyang Changchun Economic Development Zone	Hunan	Yiyang	-	Comprehensive	Machinery manufacturing; electronics manufacturing; food manufacturing
583	Taojiang Grey Mountain Port Industrial Concentration Zone	Hunan	Yiyang	-	Chemical industry	Non-metallic mineral products industry; non-ferrous metal smelting and rolling processing industry
584	Datong Lake Industrial Concentration Zone	Hunan	Yiyang	-	Industrial and agricultural composites	Agricultural and sideline food processing industry; pharmaceutical industry
585	Anhua County Economic Development Zone Gaoming Circular Economy Industrial Park	Hunan	Yiyang	-	Others	Recycling industry
586	Hunan Jiahe Economic Development Zone	Hunan	Chenzhou	Provincial level	Machinery and equipment	Casting; forging; equipment manufacturing
587	Guiyang Industrial Park	Hunan	Chenzhou	Provincial level	Comprehensive	Non-ferrous metal smelting and rolling processing industry; food manufacturing; non-metallic mineral products processing industry
588	Yucheng Economic Development Zone	Hunan	Chenzhou	Provincial level	Metallurgy	Non-ferrous metal processing industry; agriculture; cultural industry
589	Linwu Industrial Park Management Committee	Hunan	Chenzhou	Provincial level	Metallurgy	Non-ferrous metal processing industry, mineral enterprises; agricultural and sideline products food processing industry
590	Hunan Province Anren Industrial Concentration Zone	Hunan	Chenzhou	-	Chemical industry	Clothing, leather goods, electronic processing industry; modern machinery manufacturing; agricultural and sideline products deep processing industry; new energy
591	Hunan Suxian Industrial Concentration Zone	Hunan	Chenzhou	Provincial level	Industrial and agricultural composites	Agriculture and forestry products deep processing industry; electronic information; modern logistics
592	Yongxing Rare Metal Renewable Resources Utilization Industry Concentration Area	Hunan	Chenzhou	-	Others	Recycling of rare metal resources
593	Guidong Industrial Concentration Zone	Hunan	Chenzhou	-	Chemical industry	Non-metallic mineral products industry; manufacturing; textile and apparel, apparel industry
594	Yizhang Fluorine Chemical Industry Concentration Zone	Hunan	Chenzhou	-	Chemical industry	Fluorine industry
595	Shonan International Logistics Park	Hunan	Chenzhou	-	Others	Warehousing, logistics, mineral products
596	Zhangzhou Economic Development Zone	Hunan	Chenzhou	-	Comprehensive	Advanced equipment manufacturing industry; non-ferrous metal deep processing industry; biomedical food manufacturing industry
597	Hunan Zixing Economic Development Zone	Hunan	Chenzhou	Provincial level	Comprehensive	Non-ferrous metal smelting and processing industry; electronic information; food processing industry
598	Jianghua Economic Development Zone	Hunan	Yongzhou	Provincial level	Metallurgy	Non-ferrous metal smelting and processing industry; information industry; new energy
599	Yongzhou Economic and Technological Development Zone	Hunan	Yongzhou	Provincial level	Comprehensive	Advanced equipment manufacturing industry; food and pharmaceutical industry; electronic information industry
600	Double-brand Industrial Concentration Area	Hunan	Yongzhou	-	Industrial and agricultural composites	Bamboo and wood processing industry; fine chemicals
601	Jiangyong Industrial Concentration Zone	Hunan	Yongzhou	-	Industrial and agricultural composites	Deep processing industry for agricultural and forestry products; non-ferrous metal smelting industry
602	Xintian Industrial Concentration Zone	Hunan	Yongzhou	-	Comprehensive	Furniture processing industry; selenium-enriched agricultural products processing industry; machinery manufacturing industry
603	Jianghua Yao Autonomous County High-tech Mining and Metallurgy Circular Economy Industrial Park	Hunan	Yongzhou	-	Machinery and equipment	Mining and metallurgy cycle; mineral application; hardware processing industry
604	Hunan Huaihua Industrial Park	Hunan	Huaihua	Provincial level	Light industry	Pharmaceutical manufacturing; agricultural and sideline food processing industry; paper and paper products industry
605	Chenxi Industrial Concentration Zone	Hunan	Huaihua	-	High technology	Production of high-purity kaolin, graphite, diatomaceous earth and other non-metallic mineral deep processing materials and its technology development; new electronic components manufacturing industry
606	Hecheng Industrial Concentration Zone	Hunan	Huaihua	-	Machinery and equipment	General equipment manufacturing; pharmaceutical manufacturing
607	Hongjiang District Industrial Concentration Zone	Hunan	Huaihua	-	Chemical industry	Chemical raw materials and chemical manufacturing; pharmaceutical manufacturing
608	Hongjiang City Industry Concentration Area	Hunan	Huaihua	-	Building materials	Medicine and food; new building materials
609	Huitong Industrial Concentration Zone	Hunan	Huaihua	-	Machinery and equipment	Production and comprehensive utilization of wood composite materials and bamboo engineering materials; common ferroalloy ore furnace manufacturing
610	Ganzhou Comprehensive Processing Park in Jingzhou Industrial Concentration Zone	Hunan	Huaihua	-	Comprehensive	Deep processing of bamboo and wood; new materials; industrial warehouse logistics
611	Mayang County Industrial Concentration Zone	Hunan	Huaihua	-	Industrial and agricultural composites	Electronics industry; agricultural and sideline products processing industry
612	Tongxian County Industrial Concentration Zone	Hunan	Huaihua	-	Industrial and agricultural composites	Agricultural and sideline food processing industry; wood processing and wood, bamboo, rattan, brown, grass products industry
613	Xinhuang Industrial Concentration Zone	Hunan	Huaihua	-	Others	Agricultural and sideline food processing industry; non-metallic mineral products industry
614	Zhangpu County Industrial Concentration Zone Management Committee	Hunan	Huaihua	-	Chemical industry	Chemical industry; agricultural product processing; building materials
615	Fuling Industrial Concentration Zone	Hunan	Huaihua	-	Light industry	Computer, communication and other electronic equipment manufacturing; agricultural and sideline food processing
616	Zhongfang Industrial Concentration Area	Hunan	Huaihua	Provincial level	Building materials	New building materials; agricultural and sideline products processing; machinery and electronics manufacturing
617	Wuyuan Economic Development Zone	Hunan	Loudi	Provincial level	High technology	Advanced equipment manufacturing; new materials; biomedicine
618	Lengshuijiang Economic Development Zone	Hunan	Loudi	-	Metallurgy	Ferrous metal smelting and rolling processing industry; electricity, heat production and supply; metal products industry
619	Xiangxi Economic Development Zone	Hunan	Xiangxi Zhou	-	Comprehensive	Ferrous metal processing industry; cement manufacturing; biomedicine
620	Hunan Jishou Economic Development Zone	Hunan	Xiangxi Zhou	-	Light industry	Mineral deep processing industry; pharmaceutical industry; food processing industry
621	Hunan Yongshun Economic Development Zone	Hunan	Xiangxi Zhou	-	Light industry	Food processing industry; pharmaceutical industry; garment processing industry
622	Tunxi Industrial Concentration Zone	Hunan	Xiangxi Zhou	-	Metallurgy	Deep processing of aluminum series materials; processing of new metal materials; light industry
623	Longshan Industrial Concentration Zone	Hunan	Xiangxi Zhou	-	Building materials	New building materials; pharmaceutical manufacturing
624	Guzhang County Provincial Industrial Concentration Zone	Hunan	Xiangxi Zhou	-	Building materials	Cement; stone; food processing industry
625	Nanjing Liuhe Economic Development Zone	Jiangsu	Nanjing	-	Comprehensive	Equipment manufacturing industry; energy saving and environmental protection; light industry textile industry
626	Nanjing Jiangning Binjiang Economic Development Zone	Jiangsu	Nanjing	Provincial level	Machinery and equipment	Chemical equipment industry; nuclear power equipment industry; rail transportation industry
627	Jiangsu Gaochun Economic Development Zone	Jiangsu	Nanjing	Provincial level	High technology	High-end equipment manufacturing; new materials manufacturing; medical health industry
628	Jiangsu Lishui Economic Development Zone	Jiangsu	Nanjing	Provincial level	Machinery and equipment	Automotive Manufacturing
629	Nanjing Jiangning Economic and Technological Development Zone Park	Jiangsu	Nanjing	National level	Machinery and equipment	Automobile and parts industry; electronic information industry
630	Wuxi Taihu National Tourism Resort	Jiangsu	Wuxi	National level	Others	Biomedical industry; metal products and equipment manufacturing; tourism and leisure and ancillary services
631	Wuxi Economic Development Zone	Jiangsu	Wuxi	Provincial level	Machinery and equipment	manufacturing
632	Wuxi Liyuan Economic Development Zone	Jiangsu	Wuxi	Provincial level	High technology	R & D design; precision machinery manufacturing; electronic information industry
633	Wuxi Shanshui City Management Committee	Jiangsu	Wuxi	-	Machinery and equipment	manufacturing
634	Wuxi National High-tech Industrial Development Zone (Wuxi High-tech Zone Comprehensive Bonded Zone and Wuxi Airport Economic Development Zone)	Jiangsu	Wuxi	National level	Machinery and equipment	Equipment manufacturing; microelectronics; new materials and new display industries
635	Jiangsu Yixing Ceramic Industrial Park	Jiangsu	Wuxi	Provincial level	Machinery and equipment	Non-metallic mineral products processing industry; machinery equipment manufacturing; electronic and electrical appliance manufacturing
636	Yixing Economic and Technological Development Zone	Jiangsu	Wuxi	National level	High technology	New energy manufacturing; fine chemicals
637	China Yixing Environmental Protection Technology Industrial Park	Jiangsu	Wuxi	National level	Machinery and equipment	Mechanical equipment manufacturing
638	Xishan Economic and Technological Development Zone	Jiangsu	Wuxi	National level	High technology	Electronic information; precision machinery manufacturing; Gaote textile manufacturing
639	Jiangsu Wuxi Huishan Economic Development Zone	Jiangsu	Wuxi	Provincial level	High technology	Auto parts manufacturing; biomedicine; textile manufacturing
640	Jiangyin High-tech Industrial Development Zone	Jiangsu	Wuxi	National level	Comprehensive	Steel; fine spinning industry; high-tech manufacturing
641	Jiangsu Jiangyin Lingang Economic Development Zone	Jiangsu	Wuxi	-	Machinery and equipment	Mechanical manufacturing; metallurgy; chemical industry
642	Fengxian Economic Development Zone	Jiangsu	Xuzhou	Provincial level	Comprehensive	Steel; worsted; high-tech industry
643	Jiangsu Yinzhou Economic Development Zone	Jiangsu	Xuzhou	Provincial level	Machinery and equipment	Mechanical manufacturing; metallurgy; chemical industry
644	Zhangzhou High-tech Zone	Jiangsu	Xuzhou	-	High technology	Intelligent equipment manufacturing
645	Jiangsu Suining Economic Development Zone	Jiangsu	Xuzhou	Provincial level	Machinery and equipment	White goods industry
646	Jiangsu Xinyi Economic Development Zone	Jiangsu	Xuzhou	Provincial level	Comprehensive	Fine chemical industry; metallurgy, machinery manufacturing; new materials (polymers and silicon materials, new building materials and waterproof materials)
647	Xuzhou High-tech Industrial Development Zone	Jiangsu	Xuzhou	National level	Machinery and equipment	Equipment manufacturing industry; electronic information; automobile manufacturing
648	Jiangsu Xuzhou Industrial Park	Jiangsu	Xuzhou	-	Chemical industry	Chemical raw materials and chemical products manufacturing; railway, shipbuilding, aerospace and other transportation equipment manufacturing; furniture manufacturing
649	Xuzhou Economic and Technological Development Zone	Jiangsu	Xuzhou	National level	Machinery and equipment	Construction machinery manufacturing; solar photovoltaic
650	Jiangsu Pei County Economic Development Zone	Jiangsu	Xuzhou	Provincial level	Comprehensive	New aluminum industry; green food industry; photovoltaic industry
651	Jiangsu Jintan Economic Development Zone	Jiangsu	Changzhou	Provincial level	High technology	High-end equipment manufacturing
652	Changzhou West Taihu Technology Industrial Park	Jiangsu	Changzhou	Provincial level	High technology	Carbon material manufacturing
653	Changzhou National High-tech Industrial Development Zone	Jiangsu	Changzhou	National level	Machinery and equipment	Equipment Manufacturing
654	Jiangsu Changzhou Zhonglou Economic Development Zone	Jiangsu	Changzhou	Provincial level	Chemical industry	Chemical raw materials and chemical products manufacturing
655	Jiangsu Changzhou Economic Development Zone	Jiangsu	Changzhou	Provincial level	Comprehensive	Rail transit; smart grid; new material manufacturing
656	Wujin High-tech Industrial Development Zone	Jiangsu	Changzhou	National level	Machinery and equipment	Advanced equipment manufacturing industry; electronic information industry; new energy, new light source manufacturing
657	Jiangsu Changzhou Binjiang Economic Development Zone	Jiangsu	Changzhou	Provincial level	Chemical industry	Chemical new material manufacturing; equipment manufacturing; port logistics
658	Tianning Economic Development Zone	Jiangsu	Changzhou	Provincial level	High technology	New energy and new materials, power equipment, machinery and electronics, textile and garment manufacturing
659	Changshu High-tech Industrial Development Zone	Jiangsu	Suzhou	National level	High technology	Computer communication
660	Changshu Economic and Technological Development Zone	Jiangsu	Suzhou	National level	Machinery and equipment	Automobile and parts manufacturing
661	Suzhou High-tech Industrial Development Zone	Jiangsu	Suzhou	National level	High technology	New flat panel display manufacturing
662	Jiangsu Kunshan Huaqiao Economic Development Zone	Jiangsu	Suzhou	Provincial level	Others	Modern service industry
663	Kunshan Economic and Technological Development Zone	Jiangsu	Suzhou	National level	High technology	IT industry
664	Suzhou Industrial Park	Jiangsu	Suzhou	National level	High technology	Electronic information industry
665	Taicang Port Economic and Technological Development Zone	Jiangsu	Suzhou	National level	High technology	New material manufacturing
666	Jiangsu Wuhu High-tech Industrial Development Zone	Jiangsu	Suzhou	Provincial level	Machinery and equipment	Equipment manufacturing
667	Suzhou Wuzhong Economic and Technological Development Zone	Jiangsu	Suzhou	National level	High technology	Electronics manufacturing
668	Suzhou Xiangcheng Economic and Technological Development Zone	Jiangsu	Suzhou	National level	High technology	Computer, communications and other electronic equipment manufacturing; electrical machinery and equipment manufacturing; chemical fiber manufacturing
669	Zhangjiagang Bonded Port Area	Jiangsu	Suzhou	National level	Chemical industry	Chemical industry
670	Zhangjiagang Economic and Technological Development Zone	Jiangsu	Suzhou	National level	Light industry	Textile and garment manufacturing
671	Jiangsu Yangzijiang Metallurgical Industrial Park	Jiangsu	Suzhou	-	Metallurgy	Metallurgy; new building materials; mechanical equipment industry
672	Jiangsu Wujiang High-tech Industrial Park	Jiangsu	Suzhou	-	Light industry	Textile industry
673	Nantong Chongchuan Economic Development Zone	Jiangsu	Nantong	Provincial level	High technology	Electronics; new materials manufacturing; textile and garment manufacturing
674	Hai'an High-tech Industrial Development Zone	Jiangsu	Nantong	-	Machinery and equipment	Labor-intensive manufacturing; high-tech manufacturing
675	Hai'an Economic and Technological Development Zone	Jiangsu	Nantong	National level	Comprehensive	Equipment manufacturing industry; new materials and new energy; textile manufacturing
676	Rugao Economic and Technological Development Zone Industrial Park	Jiangsu	Nantong	National level	Machinery and equipment	New energy vehicles and parts manufacturing; electrical machinery and equipment manufacturing; textile and garment manufacturing
677	Nantong High-tech Industrial Development Zone	Jiangsu	Nantong	National level	Machinery and equipment	Machinery manufacturing; clothing, textile manufacturing
678	Lianyungang Economic and Technological Development Zone	Jiangsu	Lianyungang	National level	Others	Life health; large equipment manufacturing; advanced materials manufacturing
679	National East-West Regional Cooperation Demonstration Zone (Lianyungang Xujing New District)	Jiangsu	Lianyungang	National level	Chemical industry	Petrochemical; quality steel; energy saving and environmental protection
680	Jiangsu Donghai Economic Development Zone	Jiangsu	Lianyungang	Provincial level	Chemical industry	Silicon industry; deep processing of agricultural and sideline products; textile manufacturing industry
681	Jiangsu Lianyungang Chemical Industry Park	Jiangsu	Lianyungang	Provincial level	Metallurgy	Chemical industry
682	Jiangsu Guanyun Economic Development Zone	Jiangsu	Lianyungang	Provincial level	Machinery and equipment	Equipment manufacturing industry; light industry textile industry; metal manufacturing industry
683	Jiangsu Haizhou Economic Development Zone	Jiangsu	Lianyungang	Provincial level	High technology	High-end equipment manufacturing; new medicine; new material manufacturing
684	Jiangsu Lianyun Economic Development Zone	Jiangsu	Lianyungang	Provincial level	Comprehensive	Salt chemical industry; metal material manufacturing; modern logistics
685	Jiangsu Economic Development Zone	Jiangsu	Lianyungang	Provincial level	Metallurgy	Steel products manufacturing industry; new energy new materials; bio-pharmaceutical industry
686	Ganyu Zhewang port industrial zone	Jiangsu	Lianyungang	-	Chemical industry	Petrochemical
687	Haizhou Bay Biotechnology Park	Jiangsu	Lianyungang	-	Chemical industry	Biochemical industry; machinery manufacturing; new material manufacturing
688	Huai'an Salt Chemical New Material Industrial Park	Jiangsu	Huaian	-	Chemical industry	Two alkali and one salt industry chain; fine chemicals (new pesticides and medicines); new materials manufacturing
689	Jiangsu Hongze Economic Development Zone	Jiangsu	Huaian	Provincial level	Comprehensive	Chemical raw materials and chemical products manufacturing; textile industry; ferrous metal smelting and rolling processing industry
690	Huai'an High-tech Industrial Development Zone	Jiangsu	Huaian	Provincial level	Machinery and equipment	Modern equipment manufacturing; electromechanical and electronic technology; clean energy utilization
691	Jiangsu Jinhu Economic Development Zone	Jiangsu	Huaian	Provincial level	Machinery and equipment	Machinery manufacturing industry; instrument cable industry; new material industry
692	Huai'an Economic and Technological Development Zone	Jiangsu	Huaian	National level	High technology	Electronic information industry; salinized new materials manufacturing; machinery manufacturing
693	Sheyang Port Economic Zone	Jiangsu	Yancheng	-	High technology	new energy
694	Jiangsu Jianhu Economic Development Zone	Jiangsu	Yancheng	Provincial level	Machinery and equipment	Machinery, light industry manufacturing
695	Coastal Industrial Park of Binhai Economic Development Zone	Jiangsu	Yancheng	-	Chemical industry	Chemical and new pharmaceutical manufacturing
696	Jiangsu Binhai Economic Development Zone	Jiangsu	Yancheng	Provincial level	Machinery and equipment	General equipment manufacturing
697	Jiangsu Dafeng Economic Development Zone	Jiangsu	Yancheng	Provincial level	Machinery and equipment	Automobile spare parts industry manufacturing
698	Xiangshui Industrial Economic Zone	Jiangsu	Yancheng	-	Metallurgy	Alloy manufacturing
699	Xiangshui Ecological Chemical Industry Park	Jiangsu	Yancheng	-	Chemical industry	Salt chemical
700	Jiangsu Xiangshui Economic Development Zone	Jiangsu	Yancheng	Provincial level	Light industry	Textile and garment manufacturing
701	Jiangsu Dongtai Economic Development Zone	Jiangsu	Yancheng	Provincial level	High technology	New material manufacturing
702	Jiangsu Dongtai Coastal Economic Zone	Jiangsu	Yancheng	-	High technology	New energy and equipment manufacturing
703	Yancheng Economic and Technological Development Zone	Jiangsu	Yancheng	National level	Machinery and equipment	Automobile and parts industry
704	Yancheng National High-tech Industrial Development Zone	Jiangsu	Yancheng	National level	Machinery and equipment	Wind power equipment manufacturing
705	Jiangsu Baoying Economic Development Zone	Jiangsu	Yazhou	Provincial level	Machinery and equipment	Intelligent transmission and transformation equipment manufacturing industry
706	Yangzhou High-tech Industrial Development Zone	Jiangsu	Yazhou	National level	Machinery and equipment	CNC machine tool manufacturing
707	Jiangsu Gaoyou Economic Development Zone	Jiangsu	Yazhou	Provincial level	Machinery and equipment	industry
708	Jiangsu Yangzhou Guangling Economic Development Zone	Jiangsu	Yazhou	Provincial level	Machinery and equipment	Precision machinery equipment manufacturing
709	Yangzhou Chemical Industry Park	Jiangsu	Yazhou	Provincial level	Chemical industry	Petrochemical
710	Jiangdu Economic Development Zone	Jiangsu	Yazhou	Provincial level	Machinery and equipment	Shipbuilding industry
711	Yangzhou Economic and Technological Development Zone	Jiangsu	Yazhou	National level	Comprehensive	Green Optoelectronics; automotive and parts manufacturing; high-end light industry manufacturing
712	Jiangsu Yangzhou Weiyang Economic Development Zone	Jiangsu	Yazhou	Provincial level	Machinery and equipment	Auto parts manufacturing
713	Jiangsu Yizheng Economic Development Zone	Jiangsu	Yazhou	Provincial level	Machinery and equipment	Automobile car and parts industry
714	Jiangsu Dantu Economic Development Zone	Jiangsu	Zhenjiang	Provincial level	High technology	Manufacturing
715	Jiangsu Danyang Economic Development Zone	Jiangsu	Zhenjiang	Provincial level	Machinery and equipment	Optics; hardware tools and new special steel manufacturing; auto parts manufacturing
716	Jurong Economic Development Zone	Jiangsu	Zhenjiang	Provincial level	High technology	Photoelectron; power transmission and transformation; sports equipment manufacturing
717	Zhenjiang Economic and Technological Development Zone	Jiangsu	Zhenjiang	National level	Chemical industry	Fine chemicals; paper making; electronic components manufacturing
718	Taizhou Pharmaceutical High-tech Industrial Development Zone	Jiangsu	Taizhou	National level	Light industry	Medicine
719	Jiangsu Taizhou Hailing Industrial Park	Jiangsu	Taizhou	Provincial level	Machinery and equipment	Electronics manufacturing; machinery manufacturing; cultural creativity
720	Taizhou New Energy Industrial Park	Jiangsu	Taizhou	-	High technology	High-tech industry; photovoltaic; new energy machinery and equipment manufacturing industry
721	Jingjiang Economic and Technological Development Zone	Jiangsu	Taizhou	National level	High technology	Electricity; steel; modern service industry
722	Jiangsu Dainan Science and Technology Park	Jiangsu	Taizhou	-	Others	Waste stainless steel recycling
723	Anfeng Industrial Park	Jiangsu	Taizhou	-	Machinery and equipment	Manufacturing
724	Taixing Economic Development Zone	Jiangsu	Taizhou	Provincial level	Chemical industry	Chemical industry
725	Taixing Huangqiao Industrial Park	Jiangsu	Taizhou	-	Comprehensive	Equipment manufacturing industry; new materials, new energy; textile and garment manufacturing
726	Jiangsu Taixing Environmental Protection Technology Industrial Park	Jiangsu	Taizhou	-	Machinery and equipment	Environmental protection machinery manufacturing; energy-saving electrical appliance manufacturing; equipment manufacturing
727	Xinghua Economic Development Zone, Jiangsu Province	Jiangsu	Taizhou	Provincial level	Machinery and equipment	Healthy food manufacturing; high-end machinery manufacturing
728	Jiangsu Taizhou Gaogang High-tech Industrial Park	Jiangsu	Taizhou	Provincial level	Comprehensive	Automobile and motorcycle parts manufacturing; electronic information; life and health
729	Suqian Economic and Technological Development Zone	Jiangsu	Suqian	National level	Light industry	Food and beverage manufacturing; smart home appliance manufacturing; optoelectronics
730	Puyang Economic and Technological Development Zone	Jiangsu	Suqian	National level	Comprehensive	Textile and garment manufacturing; equipment manufacturing manufacturing; electronic information
731	Jiangsu Sihong Economic Development Zone	Jiangsu	Suqian	Provincial level	Comprehensive	Electronic information industry; plastic film new material manufacturing; machinery manufacturing
732	Jiangsu Sihong Machinery Parts Manufacturing Industrial Park	Jiangsu	Suqian	-	Machinery and equipment	Machinery manufacturing
733	Jiangsu Suzhou Suqian Industrial Park	Jiangsu	Suqian	Provincial level	Comprehensive	Electronic information; precision machinery manufacturing; commercial real estate
734	Jiangsu Sucheng Economic Development Zone	Jiangsu	Suqian	Provincial level	Comprehensive	Textile and garment manufacturing; smart grid; green building materials manufacturing
735	Jiangsu Suqian High-tech Industrial Development Zone	Jiangsu	Suqian	Provincial level	Comprehensive	New material manufacturing; equipment manufacturing; food and beverage manufacturing
736	Jiangsu Shuyang Economic Development Zone	Jiangsu	Suqian	Provincial level	Light industry	Textile and garment manufacturing; auto parts manufacturing; food manufacturing
737	Ji'an City Industrial Park Management Committee	Jiangxi	Ji'an	Provincial level	High technology	Electronic information industry; selenium-rich green food manufacturing; biomedical industry
738	Ji'an Jishui Industrial Park	Jiangxi	Ji'an	Provincial level	Industrial and agricultural composites	Electronic information; forestry and fragrance manufacturing; green food manufacturing
739	Ji'an High-tech Industrial Park	Jiangxi	Ji'an	National level	High technology	Electronic information; precision machinery manufacturing; new energy
740	Ji'an Xiajiang County Industrial Park	Jiangxi	Ji'an	Provincial level	Machinery and equipment	Biomedicine; metal manufacturing; papermaking
741	Ji'an Luanchuan County Industrial Park	Jiangxi	Ji'an	Provincial level	Chemical industry	Forest chemical industry; electronic information; green food manufacturing
742	Ji'an Xingan County Industrial Park	Jiangxi	Ji'an	Provincial level	Comprehensive	Salt and halogen medicinal; mechanical and electrical; luggage leather goods manufacturing
743	Ji'an Yongfeng County Industrial Park	Jiangxi	Ji'an	Provincial level	Comprehensive	Petrochemical economy; pharmaceutical food; circular economy industry
744	Ji'an Yongxin County Industrial Park	Jiangxi	Ji'an	Provincial level	Light industry	Leather products industry; copper products industry; textile and garment industry
745	Ji'an Jizhou Industrial Park	Jiangxi	Ji'an	Provincial level	High technology	Electronics; machinery manufacturing
746	Ji'an Jinggangshan Economic and Technological Development Zone	Jiangxi	Ji'an	National level	High technology	Electronic information; food and pharmaceutical manufacturing; advanced manufacturing
747	Ji'an Hedong Economic Development Zone	Jiangxi	Ji'an	Provincial level	High technology	Electronic information; biomedicine
748	Ji'an Taihe Industrial Park	Jiangxi	Ji'an	Provincial level	Comprehensive	Electronics manufacturing; machinery manufacturing; green food manufacturing
749	Jiangxi Fengcheng High-tech Industrial Park	Jiangxi	Fengcheng	-	High technology	Manufacturing industry; new material manufacturing
750	Jiangxi Fengcheng Circular Economy Industrial Park	Jiangxi	Fengcheng	-	Others	Resource recycling industry
751	Jiangxi Xinyu Yuanhe Economic Development Zone	Jiangxi	Xinyu	-	Metallurgy	Steel deep processing industry; agricultural machinery manufacturing; modern equipment manufacturing
752	Xinyu High-tech Industrial Development Zone	Jiangxi	Xinyu	National level	High technology	New energy industry; new material industry; steel equipment manufacturing industry
753	Jiangxi Jinxian Economic Development Zone	Jiangxi	Nanchang	-	Machinery and equipment	Medical equipment industry; steel grid manufacturing; equipment manufacturing
754	Nanchang High-tech Industrial Development Zone	Jiangxi	Nanchang	National level	High technology	Biomedicine; optoelectronics and communication; aviation
755	Yichun Economic and Technological Development Zone	Jiangxi	Yichun	National level	Machinery and equipment	Lithium battery manufacturing industry; electromechanical manufacturing industry; new material manufacturing industry
756	Jiangxi Yuanzhou Pharmaceutical Industrial Park	Jiangxi	Yichun	-	Chemical industry	Biomedicine
757	Jiangxi Shanggao Industrial Park	Jiangxi	Yichun	National level	Light industry	Food manufacturing industry; footwear industry
758	Jiangxi Jing'an Industrial Park	Jiangxi	Yichun	National level	Metallurgy	Cemented carbide manufacturing; green lighting manufacturing
759	Jiangxi Yushu Industrial Park	Jiangxi	Zhangshu	National level	Light industry	Pharmaceutical manufacturing; salt chemical industry; metal and furniture manufacturing
760	Jiangxi Wan Zai Industrial Park	Jiangxi	Yichun	National level	Comprehensive	Organic food manufacturing; lighting and lighting manufacturing; circular economy
761	Jiangxi Yifeng Industrial Park	Jiangxi	Yichun	National level	Comprehensive	Manufacturing and processing industry
762	Jiangxi Fengxin Industrial Park	Jiangxi	Yichun	National level	Comprehensive	Textile manufacturing; new material manufacturing; bamboo and wood manufacturing
763	Jiangxi Province Construction Ceramics Industry Base	Jiangxi	Yichun	-	Building materials	Building ceramics manufacturing
764	Jiangxi Tonggu Industrial Park	Jiangxi	Yichun	-	Industrial and agricultural composites	Bamboo fine processing industry; medicine; organic agricultural product processing industry
765	Jingdezhen Ceramic Industrial Park	Jiangxi	Jingdezhen	Provincial level	Light industry	Ceramic manufacturing
766	Jingdezhen National High-tech Industrial Development Zone	Jiangxi	Jingdezhen	National level	High technology	Aviation; home appliance electronics manufacturing; auto parts manufacturing
767	Jiangxi Leping Industrial Park	Jiangxi	Jingdezhen	Provincial level	Chemical industry	Fine Chemicals
768	Jiangxi Yinzhou Economic and Technological Development Zone	Jiangxi	Ganzhou	National level	High technology	New energy vehicles; electronic information; biopharmaceuticals
769	Jiangxi Yinzhou High-tech Industrial Park	Jiangxi	Ganzhou	National level	Metallurgy	Rare earth, tungsten deep processing; biological food; equipment manufacturing
770	Jiangxi Longnan Economic and Technological Development Zone	Jiangxi	Ganzhou	National level	Metallurgy	Rare earth deep processing and application industry; electronic information industry; modern light industry
771	Jiangxi Ruijin Economic and Technological Development Zone	Jiangxi	Ganzhou	National level	Comprehensive	Electrical harness industry
772	Jiangxi Zhanggong Economic Development Zone	Jiangxi	Ganzhou	Provincial level	Machinery and equipment	Equipment manufacturing; biopharmaceutical
773	Jiangxi Nankang Economic Development Zone	Jiangxi	Ganzhou	Provincial level	Metallurgy	Non-ferrous metals; furniture manufacturing; electronic information
774	Jiangxi Xingguo Economic Development Zone	Jiangxi	Ganzhou	Provincial level	Comprehensive	Fluorine industry; electromechanical industry; food industry
775	Jiangxi Xinfeng Industrial Park	Jiangxi	Ganzhou	Provincial level	High technology	Electronic information; new building materials manufacturing; food and pharmaceutical industry
776	Jiangxi Dayu Industrial Park	Jiangxi	Ganzhou	Provincial level	Metallurgy	Processing of tungsten and non-ferrous metals; new materials; electronic information
777	Jiangxi Shangyu Industrial Park	Jiangxi	Ganzhou	Provincial level	High technology	Glass fiber new composite material; precision mold and CNC machine tool
778	Jiangxi Anyuan Industrial Park	Jiangxi	Ganzhou	Provincial level	Comprehensive	Electronic audio manufacturing; clothing and footwear manufacturing; deep processing of agricultural products
779	Jiangxi Quannan Industrial Park	Jiangxi	Ganzhou	Provincial level	Chemical industry	Deep processing of mineral products; mechanical and electronic; modern warp spinning
780	Jiangxi Ningdu Industrial Park	Jiangxi	Ganzhou	Provincial level	Light industry	Light textile
781	Jiangxi Yudu Industrial Park	Jiangxi	Ganzhou	Provincial level	Light industry	Clothing and apparel manufacturing
782	Jiangxi Huichang Industrial Park	Jiangxi	Ganzhou	Provincial level	Chemical industry	Fluorine salt chemical; specialty food processing; biopharmaceutical
783	Jiangxi Xunwu Industrial Park	Jiangxi	Ganzhou	-	Building materials	New building materials manufacturing; rare earth new materials and applications
784	Jiangxi Shicheng Industrial Park	Jiangxi	Ganzhou	-	Machinery and equipment	Mining machinery; textile electronics; recycling of electronic products
785	Jiangxi Shangrao Tea Pavilion Industrial Park	Jiangxi	Shangrao	-	Metallurgy	Non-ferrous metal deep processing; mechanical manufacturing
786	Lead Mountain County Industrial Park	Jiangxi	Shangrao	-	Metallurgy	Non-ferrous metal smelting; fine chemicals
787	Dexing Industrial Park	Jiangxi	Shangrao	Provincial level	Chemical industry	Non-ferrous metal smelting; sulfur fluorination industry
788	Jiangxi Yushan Economic Development Zone	Jiangxi	Shangrao	Provincial level	Metallurgy	Electromechanical auto parts; non-ferrous metal smelting; new building materials
789	Jiangxi Guangfeng Economic Development Zone	Jiangxi	Shangrao	Provincial level	High technology	Electronic information; metal new material manufacturing
790	Hengfeng Economic Development Zone	Jiangxi	Shangrao	Provincial level	Metallurgy	Non-ferrous metal processing industry; machinery manufacturing
791	Wannian High-tech Industrial Park	Jiangxi	Shangrao	-	Comprehensive	Mechanical and electronic manufacturing; food processing; textile and garment manufacturing
792	Yugan High-tech Industrial Park	Jiangxi	Shangrao	Provincial level	Metallurgy	Rhinestone; non-ferrous metal smelting
793	Puyang County Industrial Park	Jiangxi	Shangrao	Provincial level	Metallurgy	Deep processing of non-ferrous metals; biomedicine
794	Jiangxi Guixi Economic Development Zone	Jiangxi	Yingtan	Provincial level	Metallurgy	Copper industry; lighting industry; machinery manufacturing industry
795	Jiangxi Yujiang Industrial Park	Jiangxi	Yingtan	Provincial level	Metallurgy	Copper industry; energy-saving lighting
796	Yingtan National High-tech Industrial Park	Jiangxi	Yingtan	National level	High technology	New copper-based materials; green hydraulics; great health
797	Pingxiang Ceramic Industry Base	Jiangxi	Pingxiang	Provincial level	Others	Industrial ceramics
798	Jiangxi Luxi Industrial Park	Jiangxi	Pingxiang	Provincial level	High technology	Electric porcelain; building materials; chemical industry
799	Pingxiang Economic and Technological Development Zone	Jiangxi	Pingxiang	National level	Comprehensive	New materials; equipment manufacturing; medical food
800	Jiangxi Shangli Industrial Park	Jiangxi	Pingxiang	Provincial level	Machinery and equipment	Advanced equipment manufacturing; new material manufacturing; powder metallurgy
801	Jiangxi Dean Industrial Park	Jiangxi	Jiujiang	Provincial level	Comprehensive	Modern textile; electronic appliances; food and medicine
802	Jiangxi Pengze Industrial Park	Jiangxi	Jiujiang	-	Chemical industry	Textile; chemical; building materials
803	Jiangxi Ruichang Economic Development Zone	Jiangxi	Jiujiang	-	Light industry	Textile and garment industry; building materials manufacturing; equipment manufacturing
804	Jiangxi Wuning Industrial Park	Jiangxi	Jiujiang	Provincial level	Light industry	Energy-saving lamp; mineral processing; biomedicine
805	Xiushui County Industrial Park	Jiangxi	Jiujiang	-	Metallurgy	Mineral processing; mechanical and electronic; textile, garment processing
806	Xiangyang District Industrial Park	Jiangxi	Jiujiang	-	Comprehensive	Petrochemical association; high-tech division; logistics
807	Jiangxi Duchang Industrial Park	Jiangxi	Jiujiang	Provincial level	Light industry	Garment textile manufacturing; green food processing; auto parts manufacturing
808	Hukou County Jinshawan Industrial Park	Jiangxi	Jiujiang	-	Metallurgy	Iron and steel metallurgy; chemical industry; chemical fiber manufacturing
809	Laoshan District Chemical Fiber Industry Base	Jiangxi	Jiujiang	-	Chemical industry	Chemical fiber; chemical industry
810	Jiangxi Yongxiu Yunshan Economic Development Zone	Jiangxi	Jiujiang	Provincial level	Chemical industry	Silicone industry
811	National Youth Entrepreneurship Base	Jiangxi	Jiujiang	Provincial level	Light industry	Textile and garment manufacturing; new energy and new materials; electronic information
812	Jiujiang Export Processing Zone	Jiangxi	Jiujiang	National level	Comprehensive	New energy; new material manufacturing; electronics
813	Xingzi County Industrial Park	Jiangxi	Jiujiang	-	Comprehensive	Sporting goods manufacturing; new material manufacturing; ship auto parts
814	Jiujiang Automobile Industrial Park	Jiangxi	Jiujiang	National level	Comprehensive	Whole vehicle and parts manufacturing; electronic information; smart home appliance manufacturing
815	Jiujiang County Chihu Industrial Park	Jiangxi	Jiujiang	-	Building materials	Light industry; chemical industry; building materials
816	Jiujiang County Shacheng Industrial Park	Jiangxi	Jiujiang	-	Light industry	Electronics; light manufacturing; equipment manufacturing
817	Jiujiang City West Port Area	Jiangxi	Jiujiang	National level	Others	Manufacturing; trade logistics
818	Nancheng Industrial Park	Jiangxi	Fuzhou	-	Comprehensive	Food processing; mechatronics; biomedicine
819	Dongxiang Economic Development Zone	Jiangxi	Fuzhou	Provincial level	Comprehensive	Electromechanical metallurgy; light industrial textile; pharmaceutical and chemical industry
820	Fuzhou High-tech Industrial Development Zone (formerly known as Jiangxi Chaozhou Jinchao Economic Development Zone)	Jiangxi	Fuzhou	National level	Machinery and equipment	Automobiles and parts; biomedicine; electronic information
821	Guangchang Industrial Park	Jiangxi	Fuzhou	-	Light industry	Textile and garment; food processing; electronic information
822	Jiangxi Lichuan Industrial Park	Jiangxi	Fuzhou	Provincial level	Comprehensive	Ceramic; new material manufacturing; shoe clothing textile
823	Jiangxi Yihuang Industrial Park	Jiangxi	Fuzhou	-	Chemical industry	Plastic products industry
824	Jilin Province Dunhua Economic Development Zone	Jilin	Yanbian Korean Autonomous Prefecture	Provincial level	Comprehensive	Pharmaceutical health industry; wood products processing industry; new material industry
825	Changchun Wushu Economic Development Zone (Changchun Yushu Economic Development Zone)	Jilin	Changchun	Provincial level	Light industry	Agricultural and sideline food processing industry; biomedicine
826	Siping Hongzui Economic and Technological Development Zone	Jilin	Siping	National level	Building materials	Equipment manufacturing industry; agricultural product processing industry; metallurgical building materials industry
827	New Materials Industrial Park	Jilin	Jilin	-	Comprehensive	Manufacturing
828	Changbai Mountain Medicine and Food Industry Park	Jilin	Jilin	-	Comprehensive	Manufacturing
829	Hunchun Border Economic Cooperation Zone	Jilin	Yanbian Korean Autonomous Prefecture	National level	Comprehensive	Energy and mineral processing industry; textile and garment processing industry; new material manufacturing industry
830	Jilin High-tech Zone	Jilin	Jilin	National level	Machinery and equipment	Automobile and component manufacturing; power electronics manufacturing; equipment manufacturing
831	Jilin Economic and Technological Development Zone	Jilin	Jilin	National level	Chemical industry	Fine chemicals; biology; new materials manufacturing
832	Fengman Economic Development Zone	Jilin	Jilin	-	Light industry	Machinery manufacturing; food manufacturing; pharmaceutical manufacturing
833	Zhongxin (China-Singapore) Jilin Food Zone	Jilin	Jilin	-	Industrial and agricultural composites	Pharmaceutical manufacturing; agricultural product processing industry; logistics
834	Xinkaihe Ginseng Industrial Park	Jilin	Tonghua	-	Industrial and agricultural composites	Pharmaceutical processing industry; green food manufacturing; mechanical processing industry
835	Jilin Jingyu Economic Development Zone Management Committee	Jilin	Baishan	-	Industrial and agricultural composites	Mineral water processing industry, traditional Chinese medicine manufacturing
836	Lijia County Guojiadian Industrial Concentration Zone	Jilin	Siping	-	Industrial and agricultural composites	Agricultural and animal products processing; chemical industry; machinery manufacturing; building materials
837	Pear Tree Economic Development Zone Huojiadian Economic Zone	Jilin	Siping	-	Others	Tourism; processing industry
838	Jilin Lishu Economic Development Zone	Jilin	Siping	-	Industrial and agricultural composites	Agricultural and sideline products processing industry
839	Jilin Liaoyuan Economic Development Zone	Jilin	Liaoyuan	Provincial level	Light industry	High-precision aluminum processing industry; medical health; textile socks industry
840	Northeast Socks Textile Industrial Park	Jilin	Liaoyuan	National level	Light industry	Textile processing industry; energy processing industry; service industry
841	Jilin Meihekou Economic Development Zone	Jilin	Tonghua	Provincial level	Light industry	Medicine; nut food processing industry; trade logistics
842	Gan'an Dry Water Industrial Concentration Zone	Jilin	Songyuan	-	Comprehensive	Mechanical processing industry; building materials; agricultural and sideline products processing industry
843	Gan'an Industrial Park	Jilin	Songyuan	-	Industrial and agricultural composites	Agricultural and sideline products processing industry; building materials; crude oil mining industry
844	Changchun Shuangyang Economic Development Zone	Jilin	Changchun	Provincial level	Comprehensive	Equipment manufacturing industry; medical health industry; new material industry
845	Yanji High-tech Industrial Development Zone	Jilin	Yanbian Korean Autonomous Prefecture	National level	Comprehensive	Medicine; energy infrastructure; food (tobacco) processing industry
846	Hunchun Border Economic Cooperation Zone	Jilin	Yanbian Korean Autonomous Prefecture	National level	Comprehensive	Energy and minerals; textile and garment industry; new material processing industry
847	Tumen Economic Development Zone	Jilin	Yanbian Korean Autonomous Prefecture	-	Comprehensive	Electronic information industry; garment processing industry; environmentally friendly plastics industry
848	Jilin Changbai Economic Development Zone	Jilin	Baishan	Provincial level	Others	Diatomite processing industry; border trade; food, pharmaceutical processing industry
849	Changbai Korean Autonomous County Badaogou Diatomite Industrial Park	Jilin	Baishan	Provincial level	Comprehensive	Diatomite processing industry; equipment processing industry; wood processing industry
850	Jilin Dongchang Economic Development Zone	Jilin	Tonghua	Provincial level	Light industry	medicine
851	Changchun Jiutai Economic Development Zone	Jilin	Changchun	Provincial level	Machinery and equipment	Mechanical processing industry; building materials; light industry
852	Jiutai Industrial Concentration Zone, Changchun City	Jilin	Changchun	-	Machinery and equipment	Mechanical processing industry; building materials; extractive industry
853	Zhenlai Economic Development Zone	Jilin	Baicheng	-	Industrial and agricultural composites	Energy industry; pharmaceutical industry; agricultural and sideline products processing industry
854	Liuhe Industrial Concentration Zone	Jilin	Tonghua	-	Light industry	Medicine; food manufacturing; metal manufacturing
855	Jilin Huinan Economic Development Zone	Jilin	Tonghua	-	Metallurgy	Medicine; metallurgy; new material manufacturing
856	National Ecological Industry Demonstration Park	Jilin	Changchun	National level	Machinery and equipment	Automobile manufacturing; auto parts manufacturing; automotive electronic parts manufacturing
857	Changchun Jingyue High-tech Industrial Development Zone	Jilin	Changchun	National level	High technology	Tourism; software information industry; automobile and parts manufacturing
858	Changchun Economic and Technological Development Zone	Jilin	Changchun	National level	Machinery and equipment	Auto parts manufacturing industry; biochemical industry
859	Dalian Economic and Technological Development Zone	Liaoning	Dalian	National level	Chemical industry	Petrochemical; equipment manufacturing; new metallurgical materials
860	Dalian Golden Pebble Beach National Tourism Resort	Liaoning	Dalian	National level	Others	Travel services
861	Dalian Golden State National Agricultural Science and Technology Park	Liaoning	Dalian	National level	Industrial and agricultural composites	Planting; vegetable and flower industry; agricultural product processing and logistics
862	Lushun Economic and Technological Development Zone	Liaoning	Dalian	National level	Machinery and equipment	Ship and locomotive transport
863	Ganjingzi Industrial Park	Liaoning	Dalian	National level	Machinery and equipment	Equipment manufacturing; biomedicine; light industry
864	Dalian Changxing Island Economic Zone	Liaoning	Dalian	National level	Chemical industry	Petrochemical; ship and ocean engineering; equipment manufacturing
865	Dalian High-tech Zone	Liaoning	Dalian	National level	High technology	Software and information technology services
866	Dalian Wafangdian Bearing Industrial Park	Liaoning	Dalian	-	Machinery and equipment	Mechanical equipment; electronic appliances; light industrial textile
867	Dalian Longmen Tourist Resort	Liaoning	Dalian	-	Others	Tourism service industry
868	Huayuankou Economic Zone	Liaoning	Dalian	-	High technology	New materials; new energy; biomedical industry
869	Dalian Science and Technology Innovation Park	Liaoning	Dalian	-	High technology	High-tech research and development and support
870	Sanchabao Industrial Technology Park	Liaoning	Dalian	-	Machinery and equipment	Pump industry; mechanical processing; high-tech industry
871	Dalian 30 Libao Lingang Industrial Zone	Liaoning	Dalian	-	Machinery and equipment	Equipment manufacturing; new energy; modern logistics
872	Lushun Lingang Low Carbon Industrial Park	Liaoning	Dalian	-	Machinery and equipment	Large equipment manufacturing, port manufacturing, logistics, technology research and development
873	Dalian Ocean Information Industry Economic Zone	Liaoning	Dalian	-	Machinery and equipment	Machining; marine information
874	Dalian Green Food Industrial Park	Liaoning	Dalian	-	Light industry	food industry
875	Shenyang-EU Economic Development Zone (Shenyang Auto City)	Liaoning	Shenyang	-	Machinery and equipment	Automobile vehicle; auto parts manufacturing
876	Shenyang Offshore Economic Zone	Liaoning	Shenyang	Provincial level	Machinery and equipment	Equipment manufacturing and supporting manufacturing; truck and special vehicle manufacturing; new material manufacturing
877	Liaoning Kangping Economic Development Zone	Liaoning	Shenyang	-	Chemical industry	Plastic knitting; textile; agricultural product processing industry
878	Shenyang Cedar Development Zone	Liaoning	Shenyang	-	Metallurgy	Non-ferrous metal new material manufacturing; ferrous metal new material manufacturing; productive service industry
879	Shenyang Economic and Technological Development Zone	Liaoning	Shenyang	National level	Machinery and equipment	Equipment manufacturing industry; automobile and parts manufacturing industry; pharmaceutical and chemical industry
880	Xinmin Economic Development Zone	Liaoning	Shenyang	Provincial level	Chemical industry	industry
881	Anshan High-tech Industrial Development Zone Management Committee	Liaoning	Anshan	National level	High technology	Opto-mechatronics, new materials, electronic information manufacturing
882	Anshan Economic Development Zone	Liaoning	Anshan	Provincial level	Metallurgy	Steel deep processing industry; equipment manufacturing; fine chemicals
883	Liaoning Anshan Tengjiao Economic Development Zone	Liaoning	Anshan	Provincial level	Machinery and equipment	Steel material deep processing industry; fine chemical industry
884	Liaoning Haicheng Economic Development Zone	Liaoning	Anshan	-	Light industry	Energy equipment manufacturing industry; garment textile printing and dyeing industry; luggage deep processing industry
885	Liaoning Tai'an Economic Development Zone	Liaoning	Anshan	-	Chemical industry	Fine chemical industry; paper industry; color coated board industry
886	Tiexi Economic Development Zone	Liaoning	Anshan	-	Machinery and equipment	Equipment manufacturing industry; new energy battery manufacturing industry; food and pharmaceutical industry
887	Tai'an Bajiaotai New City	Liaoning	Anshan	-	Comprehensive	Business; logistics; real estate
888	Tai'an Agricultural High-tech Industrial Development Zone	Liaoning	Anshan	-	Industrial and agricultural composites	Agricultural products deep processing industry
889	Dandong Border Economic Cooperation Zone	Liaoning	Dandong	-	Machinery and equipment	manufacturing
890	Liaoning Donggang Economic Development Zone	Liaoning	Dandong	Provincial level	Machinery and equipment	manufacturing
891	Dandong Dagushan Economic Zone	Liaoning	Dandong	-	Machinery and equipment	Clothing manufacturing industry; precision machinery processing industry; food manufacturing industry
892	Fengcheng Modern Industrial Park	Liaoning	Dandong	-	Machinery and equipment	Auto parts processing industry; textile and garment industry; agricultural and sideline products processing industry
893	Jinzhou Economic and Technological Development Zone	Liaoning	Jinzhou	National level	Chemical industry	manufacturing
894	Liaoning Jinzhou High-tech Industrial Development Zone	Liaoning	Jinzhou	National level	Machinery and equipment	Auto parts manufacturing industry; medicine and health food manufacturing industry
895	Heishan Panghe Economic Development Zone	Liaoning	Jinzhou	-	Industrial and agricultural composites	Agricultural machinery processing industry; agricultural and sideline products manufacturing; building materials
896	Liaoning Jinzhou Gully Economic Development Zone	Liaoning	Jinzhou	Provincial level	Industrial and agricultural composites	Agricultural and sideline products, specialty foods, deep processing industry; equipment manufacturing industry
897	Jinzhou Qilihe Economic Development Zone	Liaoning	Jinzhou	-	Comprehensive	Electromechanical equipment manufacturing industry; health food manufacturing industry; circular economy
898	Yingkou Economic and Technological Development Zone	Liaoning	Yingkou	National level	Comprehensive	Equipment manufacturing industry; modern logistics industry
899	Yingkou South Building Economic Development Zone	Liaoning	Yingkou	-	Metallurgy	Magnesium products deep processing industry
900	Dashiqiao Economic Development Zone	Liaoning	Yingkou	-	Metallurgy	High-end magnesium manufacturing; aluminum alloy manufacturing; non-ferrous metal manufacturing
901	Liaoning (Yingkou) Coastal Industrial Base	Liaoning	Yingkou	-	High technology	New material manufacturing; high-end equipment manufacturing; electronic information
902	Fuxin Renewable Resources Industrial Park	Liaoning	Fuxin	-	Others	Hazardous waste treatment
903	Fuxin Leather Industry Development Zone	Liaoning	Fuxin	-	Light industry	Leather manufacturing
904	Zhangwu County Agricultural and Sideline Products Deep Processing Industry Base	Liaoning	Fuxin	-	Industrial and agricultural composites	Agricultural and sideline products deep processing industry
905	Liaoning Fuxin Fluorine Industry Development Zone	Liaoning	Fuxin	-	Chemical industry	Fluorine industry
906	Fuxin High-tech Industrial Development Zone	Liaoning	Fuxin	National level	Machinery and equipment	Hydraulic and equipment manufacturing; electronic information; agricultural products processing industry
907	Diaobingshan Economic Development Zone	Liaoning	Tieling	-	Machinery and equipment	Machinery manufacturing
908	Lingyuan City Agricultural Products Processing Park	Liaoning	Chaoyang	-	Industrial and agricultural composites	Facility agriculture; animal husbandry; agricultural product processing industry
909	Lingyuan City Building Materials Industrial Park Management Committee	Liaoning	Chaoyang	-	Building materials	Glass manufacturing industry; perlite processing industry; new building materials manufacturing industry
910	Lingyuan Economic and Technological Development Zone	Liaoning	Chaoyang	-	Machinery and equipment	Automobile; steel; glass manufacturing
911	Liaoning Panjin Fine Chemical Industrial Park Management Committee	Liaoning	Panjin	-	Chemical industry	Petrochemical; fine chemical industry
912	Liaoning North New Material Industrial Park	Liaoning	Panjin	-	Chemical industry	Petrochemical; plastics manufacturing; manufacturing
913	Huludao Economic Development Zone	Liaoning	Huludao	Provincial level	Comprehensive	Manufacturing industry
914	Huludao High-tech Industrial Development Zone	Liaoning	Huludao	Provincial level	Chemical industry	Chemical industry; equipment manufacturing industry; new material manufacturing industry
915	Yangjiazhangzi Economic Development Zone	Liaoning	Huludao	Provincial level	Comprehensive	Mining industry; mining machinery manufacturing; new building materials manufacturing
916	Liaoning Huludao Bajiazi Economic Development Zone	Liaoning	Huludao	Provincial level	Metallurgy	Mining equipment manufacturing industry; non-ferrous metal processing industry; electronics manufacturing
917	Xingcheng Binhai Economic Zone	Liaoning	Huludao	-	High technology	Swimwear manufacturing; high performance composites manufacturing
918	Liaoyang Economic Development Zone	Liaoning	Liaoyang	Provincial level	Machinery and equipment	Equipment manufacturing; auto parts manufacturing
919	Baotou Rare Earth High-tech Industrial Development Zone	Neimenggu	Baotou	National level	Comprehensive	Rare earth manufacturing industry
920	Baotou Aluminum Industry Park	Neimenggu	Baotou	Provincial level	Metallurgy	Aluminum deep processing industry; electricity
921	Baotou Jiuyuan Industrial Park	Neimenggu	Baotou	Provincial level	Chemical industry	Coal chemical industry; ferrous metal deep processing industry
922	Baotou Shijiao Industrial Park	Neimenggu	Baotou	Provincial level	Metallurgy	Iron and steel; non-ferrous metal processing industry; comprehensive utilization of coal
923	Baotou Equipment Manufacturing Industrial Park	Neimenggu	Baotou	-	Machinery and equipment	Heavy truck equipment manufacturing industry; engineering machinery manufacturing industry; comprehensive mining industry
924	Baotou Metal Deep Processing Park	Neimenggu	Baotou	Provincial level	Metallurgy	Steel; rare earth manufacturing; logistics
925	Baotou Jinshan Industrial Park	Neimenggu	Baotou	-	Metallurgy	Non-ferrous metal smelting; ferrous metal smelting; new energy
926	Baotou Damao Ba Run Industrial Park	Neimenggu	Baotou	-	Metallurgy	Steel
927	Baotou Tuyou New Industrial Park	Neimenggu	Baotou	-	High technology	Photovoltaic photovoltaic; energy and power; comprehensive utilization of natural gas
928	Hulunbeier Economic and Technological Development Zone	Neimenggu	Hulunbeir	National level	Chemical industry	Coal; electricity; coal chemical industry
929	Inner Mongolia Arongqi Industrial Park	Neimenggu	Hulunbeir	Provincial level	Industrial and agricultural composites	Agricultural and livestock products deep processing industry; building materials; chemical industry
930	Wulanhaote Economic and Technological Development Zone	Neimenggu	Ulanhot	Provincial level	Industrial and agricultural composites	Agricultural and livestock products processing industry
931	Keyouqianqi Industrial Park	Neimenggu	Hinggan League	-	Comprehensive	New building materials manufacturing industry; equipment manufacturing industry; agricultural storage products processing industry
932	Keyouzhongqi Baijina Industrial Circular Economy Park	Neimenggu	Hinggan League	-	Comprehensive	New energy and chemical industry; new building materials manufacturing industry; agricultural and livestock products processing industry
933	Zhazi Special Banner Muir Industrial Park	Neimenggu	Hinggan League	-	Industrial and agricultural composites	Agricultural and livestock products deep processing industry
934	Tongliao Economic and Technological Development Zone	Neimenggu	Tongliao	Provincial level	Comprehensive	New coal chemical industry; biotechnology; high-end equipment manufacturing
935	Inner Mongolia Huolin Gol Industrial Park	Neimenggu	Tongliao	Provincial level	Metallurgy	Non-ferrous metal smelting and rolling processing industry, power production, coal mining
936	Kerqin Industrial Park	Neimenggu	Tongliao	-	Industrial and agricultural composites	Deep processing industry for corn; deep processing industry for agricultural and livestock products; deep processing industry for aluminum after products
937	Kailu Industrial Park	Neimenggu	Tongliao	-	Industrial and agricultural composites	Corn biotechnology; production and processing output of green agricultural and livestock products; new energy and equipment manufacturing
938	Zalut High-Tech Coal Chemical Industry Park	Neimenggu	Tongliao	-	Chemical industry	Processing industry
939	Tongzuo City Kezuohou Banner Independently Undertakes Industrial Transfer Industrial Park	Neimenggu	Tongliao	-	Comprehensive	Processing Industry
940	Cullen Banner Cullen Shenyang Industrial Park	Neimenggu	Tongliao	-	Comprehensive	Processing Industry
941	Naiman Banner Industrial Park	Neimenggu	Tongliao	-	Building materials	Nickel-chromium new composite material manufacturing; building materials; light industry food processing industry
942	Zalute Banner Zahadur Industrial Park	Neimenggu	Tongliao	-	Comprehensive	Coal industry; electricity; aluminum industry
943	Lulu Industrial Park, Zalute Banner	Neimenggu	Tongliao	-	Industrial and agricultural composites	Agricultural and livestock products processing industry
944	Chifeng Hongshan Economic Development Zone	Neimenggu	Tongliao	Provincial level	Metallurgy	Metallurgy; textile; equipment manufacturing; medicine
945	Inner Mongolia Linxi Industrial Park	Neimenggu	Tongliao	Provincial level	Metallurgy	Metallurgical chemical industry; light industry manufacturing; food processing
946	Chifeng City Resource-based City Economic Transformation Development Pilot Area	Neimenggu	Chifeng	-	Chemical industry	Biochemical; coal phosphorus chemical; equipment manufacturing
947	Kashkent Circular Economy Industrial Park	Neimenggu	Chifeng	-	Metallurgy	Coal chemical industry
948	Bahrain Zuoqi Industrial Park	Neimenggu	Chifeng	-	Machinery and equipment	Agricultural and livestock products processing; building materials, machinery manufacturing; energy, chemical industry
949	Chifeng Yulong Industrial Park	Neimenggu	Chifeng	-	Industrial and agricultural composites	Green organic farm products processing industry; comprehensive utilization of resources
950	Xilin Gol Economic and Technological Development Zone	Neimenggu	Xilinhot	Provincial level	Industrial and agricultural composites	Electricity; livestock production; equipment manufacturing
951	Duolun Industrial Park	Neimenggu	Xilingol League	-	Chemical industry	Coal chemical industry
952	Inlaid Huangqi Industrial Park	Neimenggu	Xilingol League	-	Building materials	Granite stone mining industry
953	Zhenglanqi Shangdu Industrial Park	Neimenggu	Xilingol League	-	Others	Solid waste processing and utilization
954	Is inlaid with white flag Ming'antu Industrial Park	Neimenggu	Xilingol League	-	Industrial and agricultural composites	Agricultural and livestock products processing industry; metallurgy; building materials
955	Inner Mongolia Chahar Industrial Park	Neimenggu	Ulanqab	Provincial level	Comprehensive	Green agricultural and livestock products processing industry; equipment manufacturing industry; strategic emerging industry; modern service industry
956	Inner Mongolia Dalat Economic Development Zone	Neimenggu	Ordos	Provincial level	Chemical industry	Metallurgy; building materials; chemical industry
957	Mengxi High-tech Industrial Park	Neimenggu	Ordos	Provincial level	Chemical industry	Coal-electricity conversion; chlor-alkali chemical industry; high-tech building materials manufacturing
958	Inner Mongolia Etuoke Economic Development Zone	Neimenggu	Ordos	Provincial level	Others	Chemical industry; metallurgy; power manufacturing
959	Inner Mongolia Zhungeer Economic Development Zone	Neimenggu	Ordos	Provincial level	Building materials	Building materials; coal processing industry
960	Erdos Shanghai Temple Economic Development Zone	Neimenggu	Ordos	Provincial level	Chemical industry	Coal processing industry; coal power; coal chemical industry
961	Ordos Dalu Coal Chemical Industry Base	Neimenggu	Ordos	-	Chemical industry	Coal chemical industry
962	Ordos Dugui Tara Industrial Park	Neimenggu	Ordos	-	Chemical industry	Chemical industry; equipment manufacturing; new energy manufacturing
963	Ordos New Energy Industry Demonstration Zone	Neimenggu	Ordos	-	Chemical industry	New energy generation; LNG processing industry
964	Bayannaoer Economic and Technological Development Zone	Neimenggu	Bayan Nur	Provincial level	Industrial and agricultural composites	Agricultural and livestock products processing industry; biopharmaceutical
965	Inner Mongolia Yukou Industrial Park	Neimenggu	Bayan Nur	Provincial level	Light industry	Electricity; chemical industry; food manufacturing
966	Bayannaoer Ganqi Maodu Port Processing Park	Neimenggu	Bayan Nur	-	Chemical industry	Coal chemical industry; metal smelting industry
967	Urad Front Banner Industrial Park	Neimenggu	Bayan Nur	-	Metallurgy	Metallurgy; coal chemical industry; photovoltaic industry chain based on polysilicon
968	Wuyuan Industrial Park	Neimenggu	Bayan Nur	-	Comprehensive	Agricultural and livestock products processing industry; light industry and machinery manufacturing; trade logistics
969	Urad Rear Banner Circular Economy Industrial Park	Neimenggu	Bayan Nur	-	Metallurgy	Non-ferrous metal smelting industry; vulcanization workers; coal deep processing industry
970	Hainan Industrial Park, Wuhai Economic Development Zone	Neimenggu	Wuhai	Provincial level	Chemical industry	Coal chemical industry; chlor-alkali chemical industry
971	Alashan Economic Development Zone	Neimenggu	Alxa League	Provincial level	Chemical industry	Salt chemical industry; coal chemical industry; fine chemical industry
972	Ningxia Ningdong Energy and Chemical Industry Base	Ningxia	Yinchuan	National level	Chemical industry	Coal; electricity; coal chemical; non-ferrous metal smelting
973	Yinchuan Economic and Technological Development Zone	Ningxia	Yinchuan	National level	Comprehensive	High-end equipment manufacturing; strategic new materials manufacturing; health consumer goods manufacturing
974	Yinchuan Binhe New District	Ningxia	Yinchuan	-	Comprehensive	Textile industry
975	Yinchuan Desheng Industrial Park	Ningxia	Yinchuan	Provincial level	High technology	Agricultural and sideline products processing industry; mechanical and electrical manufacturing industry; trade circulation
976	Lingwu City Recycling Resources Recycling and Utilization Demonstration Zone	Ningxia	Yinchuan	-	Metallurgy	Scrap car dismantling industry; non-ferrous metal processing industry; non-metal processing manufacturing industry
977	Shizuishan Economic and Technological Development Zone	Ningxia	Shizuishan	National level	Metallurgy	Cyanamide chemical industry; metallurgy and metal materials manufacturing; new coal chemical industry
978	Shizuishan High-tech Industrial Development Zone	Ningxia	Shizuishan	National level	Machinery and equipment	Machinery manufacturing; new material manufacturing
979	Ningxia Pingluo Industrial Park	Ningxia	Shizuishan	Provincial level	Chemical industry	Fine chemicals; biomedicine; multi-alloy manufacturing
980	Ningxia Fine Chemicals Base	Ningxia	Shizuishan	-	Chemical industry	Fine chemical industry
981	Ningxia Jinji Industrial Park	Ningxia	Wuzhong	Provincial level	Industrial and agricultural composites	Packaging and printing; chemical metallurgy
982	Qingtongxia New Material Base	Ningxia	Wuzhong	-	Metallurgy	Electricity; building materials; chemical industry; metallurgy
983	Qingtongxia Jiabao Light Industrial Park	Ningxia	Wuzhong	-	Industrial and agricultural composites	Equipment manufacturing; halal food and agricultural and sideline products deep processing industry
984	Ningxia Tongde Charity Industrial Park	Ningxia	Wuzhong	-	Industrial and agricultural composites	Halal industry
985	Ningxia Zhongwei Industrial Park	Ningxia	Zhongwei	Provincial level	Comprehensive	Iron and steel metallurgy; energy and chemical industry; photovoltaic power generation
986	Ningxia Zhongning County Industrial Park	Ningxia	Zhongwei	Provincial level	Metallurgy	Metallurgy; high-tech industry; chemical industry
987	Ningxia Guyuan Economic Development Zone	Ningxia	Guyuan	Provincial level	Chemical industry	Industrial salt; chemical industry; building materials
988	Ningxia Wuyuan County Light Industry Industrial Park	Ningxia	Guyuan	-	Industrial and agricultural composites	Halal food manufacturing; tourism products
989	Ningxia Wangfu Industrial Park, Pengyang County	Ningxia	Guyuan	-	Chemical industry	Coal processing industry
990	Chaidamu Circular Economy Experimental Area	Qinghai	Haixi Mongolian and Tibetan Autonomous Prefecture	National level	Chemical industry	Salt Lake Chemical; Metallurgy; Coal Chemical Industry
991	Chaidamu Circular Economy Experimental Zone Qaimu Industrial Park	Qinghai	Haixi Mongolian and Tibetan Autonomous Prefecture	National level	Chemical industry	Salt Lake Chemical; black colored smelting; oil and gas chemical industry
992	Qaidam Circular Economy Experimental Zone Delingha Industrial Park	Qinghai	Haixi Mongolian and Tibetan Autonomous Prefecture	National level	Chemical industry	Salt Lake Chemical; new energy (including equipment manufacturing); biological
993	Dachaidan Industrial Park, Chaidamu Circular Economy Experimental Zone	Qinghai	Haixi Mongolian and Tibetan Autonomous Prefecture	National level	Chemical industry	Coal processing; Salt Lake Chemical; non-ferrous metal smelting and processing
994	Wulan Industrial Park, Chaidamu Circular Economy Experimental Zone	Qinghai	Haixi Mongolian and Tibetan Autonomous Prefecture	National level	Chemical industry	Coal chemical industry; salt lake chemical industry; new energy
995	Xining Economic and Technological Development Zone	Qinghai	Xining	National level	Metallurgy	Silicon material photovoltaic industry; new material industry; non-ferrous metal smelting and processing
996	Dongchuan Industrial Park	Qinghai	Xining	National level	High technology	Silicon material photovoltaic industry; new material industry
997	Nanchuan Industrial Park	Qinghai	Xining	National level	Light industry	New energy new material; characteristic textile
998	Biotechnology Industrial Park	Qinghai	Xining	National level	Industrial and agricultural composites	Intensive processing of local special resources and Chinese medicine; equipment manufacturing
999	Ganhe Industrial Park	Qinghai	Xining	National level	Metallurgy	Non-ferrous metal smelting and processing; ferrous metal smelting and processing; specialty chemicals
1000	Haidong Industrial Park	Qinghai	Haidong	Provincial level	Light industry	New energy; trade logistics, bonded and airport; light industry
1001	Haidong Industrial Park Airport Comprehensive Economic Park	Qinghai	Haidong	Provincial level	High technology	New energy; information; trade logistics
1002	Haihe Industrial Park Minhe Industrial Park	Qinghai	Haidong	Provincial level	Metallurgy	Metal smelting; new materials; fine chemicals
1003	Haidong Industrial Park Ledong Industrial Park	Qinghai	Haidong	Provincial level	Chemical industry	Glass and deep processing; equipment manufacturing; PVC industry
1004	Haidong Industrial Park Mutual Aid Green Industrial Park	Qinghai	Haidong	Provincial level	Comprehensive	Light industry; characteristic light industry; biological industry
1005	Datong County Beichuan Industrial Park	Qinghai	Xining	Provincial level	Metallurgy	Metal smelting; building materials industry; characteristic chemical industry
1006	Wuyuan County Dahua Industrial Park	Qinghai	Xining	-	Metallurgy	Smelting; building materials; high altitude animal and plant processing
1007	Gangcha Hot Water Coal Industry Park	Qinghai	Tibetan Autonomous Prefecture of Haibei	-	Others	Coal washing and processing
1008	Qinghai Xunhua Halal Food (National Products) Industrial Park	Qinghai	Haidong	-	Light industry	Food processing; textile processing; craft processing
1009	Jianzha County Provincial Agricultural Science and Technology Park	Qinghai	Tibetan Autonomous Prefecture of Huangnan	-	Industrial and agricultural composites	Planting industry; aquaculture industry; processing industry
1010	Zeku County Organic Animal Husbandry Industrial Park (Zeku County Provincial Agricultural Science and Technology Park)	Qinghai	Tibetan Autonomous Prefecture of Huangnan	-	Industrial and agricultural composites	Animal product processing; cultural tourism industry; biological products industry
1011	Henan County Organic Animal Husbandry Science and Technology Demonstration Park (Henan County Provincial Agricultural Science and Technology Park)	Qinghai	Tibetan Autonomous Prefecture of Huangnan	-	Industrial and agricultural composites	Animal product processing industry; Chinese herbal medicine manufacturing industry; organic fertilizer processing industry
1012	Xi'an Qujiang New District	Shaanxi	Xi'an	-	Others	Culture Industry
1013	Xi'an City Chanba Ecological Area	Shaanxi	Xi'an	-	High technology	Finance, exhibition, tourism
1014	Xi'an Yujing Industrial Park	Shaanxi	Xi'an	-	Comprehensive	Pharmaceutical manufacturing; machinery manufacturing; agricultural and sideline products processing
1015	Daxie Technology Industrial Park	Shaanxi	Weinan	-	Comprehensive	Agricultural product processing; paper sheet manufacturing; mechanical and electronic manufacturing
1016	Shaanxi Weinan City Chengcheng County Industrial Zone	Shaanxi	Weinan	-	Metallurgy	Metallurgy
1017	Weizhuang Industrial Concentration Zone, Chengcheng, Shaanxi	Shaanxi	Weinan	-	High technology	Agricultural and sideline products deep processing industry; photovoltaic and supporting industries; logistics and warehousing industry
1018	Baishui County Leigong Circular Economy Industrial Park	Shaanxi	Weinan	-	Others	Coal mining; power production; building materials manufacturing
1019	Fuping High-tech Industrial Development Zone	Shaanxi	Weinan	-	Machinery and equipment	Equipment manufacturing; new energy and new materials; electronic information
1020	Fuping Zhuangli Industrial Park	Shaanxi	Weinan	-	Building materials	Equipment manufacturing; chemical industry; building materials
1021	Weinan High-tech Industrial Development Zone	Shaanxi	Weinan	Provincial level	Chemical industry	Fine chemicals; equipment manufacturing; new energy and new materials
1022	Pucheng High-tech Industrial Development Zone	Shaanxi	Weinan	-	Chemical industry	Chemical industry; equipment manufacturing; agriculture-related industry
1023	Weinan Economic and Technological Development Zone	Shaanxi	Weinan	-	Machinery and equipment	Deep processing of agricultural and sideline products; modern trade logistics; equipment manufacturing
1024	Jingbian Energy and Chemical Comprehensive Utilization Industrial Park	Shaanxi	Yulin	-	Chemical industry	Energy and chemical industry; warehousing and logistics
1025	County Industrial Concentration Zone of Luonan County	Shaanxi	Shangluo	-	Chemical industry	New building materials; processing of agricultural and sideline products; deep processing of mineral products
1026	Weidong County Industrial Zone	Shaanxi	Shangluo	-	Chemical industry	Pharmaceutical and chemical industry; electronic processing; new energy
1027	Luohe New Industrial Park	Shaanxi	Shangluo	-	High technology	New material manufacturing; mineral processing
1028	Danfeng County County Industrial Concentration Zone Management Committee	Shaanxi	Shangluo	-	Industrial and agricultural composites	Building materials industry; green food manufacturing; cultural tourism
1029	Shanyang County County Industrial Concentration Zone Management Committee	Shaanxi	Shangluo	-	High technology	Modern material manufacturing; agricultural and sideline products processing; modern medicine
1030	Shangnan County Industrial Park	Shaanxi	Shangluo	-	Comprehensive	High-tech new energy; processing of agricultural and sideline products; deep processing of mineral products
1031	Yingpan Tourism Industrial Park Management Committee	Shaanxi	Shangluo	-	Others	Tourism
1032	Lianshui County Xiaoling Industrial Zone	Shaanxi	Shangluo	-	Metallurgy	Iron ore mining and deep processing industry; non-ferrous and precious metal deep processing industry; waste recycling comprehensive utilization industry
1033	County District Industrial Concentration Zone of Lishui County	Shaanxi	Shangluo	-	Others	Modern medicine; ecotourism; green food processing industry
1034	Lishui County Xichuan Modern Leisure Agriculture Demonstration Park	Shaanxi	Shangluo	-	Industrial and agricultural composites	Planting; breeding; leisure sightseeing
1035	Hancheng Economic and Technological Development Zone	Shaanxi	Weinan	-	Comprehensive	Steel; coal chemical; electricity
1036	Jinjie Industrial Park	Shaanxi	Yulin	-	Comprehensive	Coal chemical industry; salt chemical industry; building materials industry; energy carrying capacity; coal power
1037	Fugu High-tech Industrial Development Zone	Shaanxi	Yulin	-	Chemical industry	Coal power; coal chemical industry; ferrosilicon manufacturing
1038	Sanyuan High-tech Industrial Development Zone	Shaanxi	Xianyang	Provincial level	High technology	Food, pharmaceutical manufacturing
1039	Xianyang High-tech Industrial Development Zone	Shaanxi	Xianyang	National level	Comprehensive	Electronic information; biomedicine; new synthetic materials manufacturing
1040	Xianyang Xinxing Textile Industrial Park	Shaanxi	Xianyang	Provincial level	Light industry	Textile; equipment manufacturing
1041	Baoji City Meixian County Changxing Textile Industrial Park	Shaanxi	Baoji	-	Light industry	Textile
1042	Shaanxi Caijiapo Economic and Technological Development Zone	Shaanxi	Baoji	Provincial level	Machinery and equipment	Manufacturing
1043	Fengzhou Modern Technology Industrial Park	Shaanxi	Baoji	-	Comprehensive	High-tech industry
1044	Baoji City Meixian Science and Technology Industrial Park	Shaanxi	Baoji	-	Metallurgy	Titanium processing, brick machine manufacturing
1045	Qianyang County Environmental Protection New Material Industrial Park	Shaanxi	Baoji	-	Building materials	Building ceramics, new materials, cement manufacturing
1046	Qingdao Huanhai Economic Development Zone	Shandong	Qingdao	Provincial level	Machinery and equipment	Rail transit; machinery manufacturing; electronics manufacturing
1047	Jiaozhou Economic and Technological Development Zone	Shandong	Qingdao	National level	Comprehensive	Manufacturing
1048	Lacey Economic Development Zone	Shandong	Qingdao	Provincial level	Comprehensive	Mechanical manufacturing; food processing; textile and clothing
1049	Shandong Pingdu Economic Development Zone	Shandong	Qingdao	Provincial level	Light industry	Food and beverage; mechanical equipment; electronic processing
1050	Qingdao Chengyang Industrial Park (Qingdao Rail Transit Industrial Development Zone)	Shandong	Qingdao	Provincial level	Comprehensive	Rail transit; new energy vehicles; new materials
1051	Shandong Yangxin Economic Development Zone	Shandong	Binzhou	Provincial level	Chemical industry	Oil and gas chemical new energy; home textile carpet manufacturing; ecological livestock
1052	Shandong Boxing Economic Development Zone	Shandong	Binzhou	Provincial level	Comprehensive	Chemical industry; grain and oil manufacturing; sheet manufacturing
1053	Zouping Economic and Technological Development Zone	Shandong	Binzhou	National level	Comprehensive	Textile and garment manufacturing; new material manufacturing; food and medicine
1054	Shandong Leling Economic Development Zone	Shandong	Dezhou	-	Comprehensive	Sports; hardware machinery and equipment manufacturing; agricultural and sideline products (food) deep processing
1055	Shandong Linyi Economic Development Zone	Shandong	Dezhou	Provincial level	Chemical industry	Petrochemical; food processing; biomedicine
1056	Plain County Economic Development Zone	Shandong	Dezhou	Provincial level	Comprehensive	Machinery manufacturing; chemical and fine chemicals; new packaging materials manufacturing
1057	Dezhou High-tech Industrial Development Zone	Shandong	Dezhou	National level	High technology	Biological products; equipment manufacturing; new materials manufacturing
1058	Shandong Dezhou Canal Economic Development Zone	Shandong	Dezhou	Provincial level	Comprehensive	Coal chemical industry; resource recycling industry; service industry
1059	Shandong Hekou Economic Development Zone	Shandong	Dongying	Provincial level	Comprehensive	Petroleum equipment; new materials; fine chemicals
1060	Kenli Economic Development Zone	Shandong	Dongying	Provincial level	Machinery and equipment	Petroleum equipment; automobiles and their supporting materials
1061	Shandong Caoxian Industrial Park	Shandong	Heze	Provincial level	Industrial and agricultural composites	Agricultural and sideline products processing; mechanical and electrical equipment manufacturing; energy and chemical industry
1062	Shandong Dingtao Industrial Park	Shandong	Heze	Provincial level	Chemical industry	Pharmaceutical and chemical industry; agricultural and sideline products; mechanical and electronic manufacturing
1063	Shandong Chengwu Industrial Park	Shandong	Heze	Provincial level	Comprehensive	High-end electromechanical equipment manufacturing industry; agricultural and sideline products processing industry; biomedical manufacturing industry
1064	Shandong Shan County Industrial Park	Shandong	Heze	Provincial level	Chemical industry	Chemical industry; textile industry; general equipment manufacturing
1065	Shandong Juye Industrial Park	Shandong	Heze	Provincial level	Chemical industry	Coal chemical industry; agricultural and sideline products processing; glass
1066	Shandong Yucheng Industrial Park	Shandong	Heze	Provincial level	Comprehensive	Textile; chemical
1067	Shandong Dongming Industrial Park	Shandong	Heze	Provincial level	Chemical industry	Petrochemical industry; building materials; processing of agricultural and sideline products
1068	Shandong Heze Economic Development Zone	Shandong	Heze	Provincial level	Chemical industry	Energy and chemical industry; mechanical and electrical equipment; biomedicine
1069	Shandong Heze Peony Industrial Park	Shandong	Heze	Provincial level	High technology	Biomedicine; machinery and electronics manufacturing; food processing industry
1070	Jining High-tech Zone	Shandong	Jining	National level	Light industry	Construction machinery; textile; biomedicine
1071	Jining Chemical Industry Development Zone	Shandong	Jining	-	Chemical industry	Chemical industry
1072	Jining Economic Development Zone	Shandong	Jining	Provincial level	Machinery and equipment	Equipment manufacturing and metal; energy building materials; photovoltaic electronic materials manufacturing
1073	Legend Holdings (Wen Shang) High-end Chemical Recycling Economic Zone	Shandong	Jining	-	Chemical industry	Chemical industry
1074	Qufu Economic Development Zone	Shandong	Jining	Provincial level	Comprehensive	Electrical and electrical equipment manufacturing; special equipment manufacturing; automobile and parts manufacturing
1075	Weishan Economic Development Zone	Shandong	Jining	-	High technology	New energy industry; food industry; new material manufacturing
1076	Wenshang Economic Development Zone	Shandong	Jining	-	Machinery and equipment	Textile and garment; mechanical and electronic; energy saving and environmental protection
1077	Zhangzhou Industrial Park	Shandong	Jining	Provincial level	Comprehensive	Papermaking; rubber products; machinery manufacturing
1078	Zoucheng Industrial Park	Shandong	Jining	-	Chemical industry	Fine chemicals; biomedicine; new materials manufacturing
1079	Zoucheng Economic Development Zone	Shandong	Jining	-	Machinery and equipment	Intelligent equipment manufacturing; new energy auto parts; aluminum industry
1080	Gangcheng High-tech Zone	Shandong	Laiwu	Provincial level	Comprehensive	Electronic information; new equipment manufacturing; steel trade circulation
1081	Shandong Dong'a Economic Development Zone	Shandong	Liaocheng	Provincial level	Comprehensive	Ejiao manufacturing; steel ball manufacturing
1082	Yanggu Xiangguang Ecological Industrial Park	Shandong	Liaocheng	-	Metallurgy	Copper smelting
1083	Shandong Linqing Economic Development Zone	Shandong	Liaocheng	Provincial level	Metallurgy	Non-ferrous metal processing industry; bearing industry
1084	Rizhao North Economic Development Zone	Shandong	Rizhao	-	Others	Automobile and parts manufacturing industry; electronic and electrical industry; high-end agricultural equipment and intelligent manufacturing
1085	Shandong Yuyue Economic Development Zone	Shandong	Taian	Provincial level	Comprehensive	Heavy equipment manufacturing; new materials; power transmission equipment manufacturing
1086	Dawenkou Industrial Park	Shandong	Taian	-	Comprehensive	Fine chemicals; heavy equipment manufacturing; new building materials manufacturing
1087	Shandong Xintai Economic Development Zone	Shandong	Taian	Provincial level	Machinery and equipment	Mining machinery equipment manufacturing and remanufacturing; coal electrolysis; biomedicine
1088	Feicheng Circular Economy Industrial Park	Shandong	Taian	-	Chemical industry	Fine chemicals; special materials; mechanical equipment manufacturing
1089	Feicheng Modern Salt Chemical Industry Park	Shandong	Taian	-	Chemical industry	Salt industry
1090	Feicheng High-tech Industrial Development Zone	Shandong	Taian	Provincial level	High technology	Energy saving and environmental protection; mechanical processing; food processing
1091	Shandong Ningyang Economic Development Zone	Shandong	Taian	Provincial level	High technology	Biotechnology; auto parts processing; machining
1092	Dongping Economic Development Zone	Shandong	Taian	Provincial level	Chemical industry	Chemical raw materials and chemical products manufacturing; agricultural and sideline products processing industry; paper and paper products industry
1093	Laizhou Economic and Technological Development Zone	Shandong	Yantai	Provincial level	Comprehensive	Machining; powder metallurgy; high-tech industry
1094	Shandong Qixia Economic Development Zone	Shandong	Yantai	-	Comprehensive	New building materials; mechanical processing; food processing and matching
1095	Yantai Economic and Technological Development Zone	Shandong	Yantai	Provincial level	Comprehensive	Mechanical manufacturing; electronic information
1096	Shandong Gaoqing Economic Development Zone	Shandong	Zibo	-	Comprehensive	Clothing textile industry; food processing industry; chemical industry
1097	Shandong Yongtai Dongyue Fluorine Silicon Material Industrial Park	Shandong	Zibo	Provincial level	Chemical industry	Fluorosilicon material manufacturing
1098	Wuyuan Economic Development Zone	Shandong	Zibo	-	Comprehensive	Medical health; new materials manufacturing; polymer manufacturing
1099	Shandong Zhoucun Economic Development Zone	Shandong	Zibo	Provincial level	Machinery and equipment	High-end equipment manufacturing; textile and clothing; environmentally friendly new materials manufacturing
1100	Shandong Luanchuan Economic Development Zone	Shandong	Zibo	Provincial level	Comprehensive	Automotive and high-end equipment manufacturing; textile and apparel; biopharmaceutical and health industry
1101	Shouguang Economic Development Zone	Shandong	Weifang	Provincial level	Comprehensive	Equipment manufacturing; deep processing of agricultural and sideline products; new chemical industry
1102	Qingzhou Economic Development Zone	Shandong	Weifang	-	Machinery and equipment	Mechanical manufacturing; fine chemicals; biomedicine
1103	Gaomi Economic Development Zone	Shandong	Weifang	-	Comprehensive	Labor insurance supplies; textile and clothing; equipment manufacturing
1104	Northeast Township Cultural Development Zone	Shandong	Weifang	-	Others	Cultural tourism; renewable resources processing industry; agricultural product processing industry
1105	Weifang Binhai Economic and Technological Development Zone	Shandong	Weifang	National level	Chemical industry	Chemical industry
1106	Weifang High-tech Industrial Development Zone	Shandong	Weifang	National level	High technology	Automobile and equipment manufacturing industry; sound and light electronics industry; biomedical industry
1107	Shanghai Jinshan Second Industrial Zone	Shanghai	Jinshan District	-	Chemical industry	Manufacturing industry
1108	Shanghai Minhang Economic and Technological Development Zone	Shanghai	Minhang District	National level	High technology	Electromechanical industry; medical and medical industry; light industry
1109	Shanghai Xinzhuang Industrial Zone	Shanghai	Minhang District	-	Machinery and equipment	Electronic information; new materials and fine chemicals; major equipment, machinery and auto parts manufacturing
1110	Zhangjiang Hi-Tech Park	Shanghai	Pudong New Area	National level	Comprehensive	Biomedicine; integrated circuit manufacturing; software
1111	Shanghai Industrial Comprehensive Development Zone	Shanghai	Fengxian District	Provincial level	Machinery and equipment	Biomedicine; automotive equipment; equipment manufacturing; electronic information; new energy
1112	Shanghai Chemical Industry Park	Shanghai	Fengxian District	National level	Chemical industry	Chemical industry
1113	Taiyuan Stainless Steel Industrial Park	Shanxi	Taiyuan	Provincial level	Metallurgy	Stainless steel deep processing; equipment manufacturing; trade logistics
1114	Shanxi Qingxu Economic Development Zone	Shanxi	Taiyuan	Provincial level	Comprehensive	Coking industry; precision casting industry
1115	Taiyuan Private Economic Development Zone	Shanxi	Taiyuan	Provincial level	Comprehensive	High-end equipment manufacturing; new energy; new material manufacturing
1116	Jinzhong Economic and Technological Development Zone	Shanxi	Jinzhong	National level	Comprehensive	Medicine and food; equipment manufacturing; energy saving and environmental protection industry
1117	Shanxi Jixian Economic Development Zone	Shanxi	Jinzhong	Provincial level	Machinery and equipment	Agricultural and sideline food processing; equipment manufacturing; glassware manufacturing
1118	Shanxi Jiaocheng Economic Development Zone	Shanxi	Lvliang	Provincial level	Chemical industry	Coking industry; coal chemical industry; equipment manufacturing
1119	Shanxi Wenshui Economic Development Zone	Shanxi	Lvliang	Provincial level	Others	Circular economy industry; chemical industry industry; mechanical equipment industry
1120	Xiaoyi Economic Development Zone	Shanxi	Lvliang	Provincial level	Chemical industry	Coal chemical industry; aluminum electrochemistry industry
1121	Shanxi Yinzhou Economic Development Zone	Shanxi	Xinzhou	Provincial level	Machinery and equipment	Equipment manufacturing; biopharmaceutical; emerging industries
1122	Fenglingdu Economic Development Zone	Shanxi	Yuncheng	Provincial level	Chemical industry	Fine Chemicals
1123	Shanxi Yinxian Economic Development Zone	Shanxi	Yuncheng	Provincial level	Machinery and equipment	Auto parts casting machine processing industry
1124	Yuncheng Airport Economic Development Zone	Shanxi	Yuncheng	Provincial level	Machinery and equipment	Equipment Manufacturing
1125	Yuncheng Economic Development Zone	Shanxi	Yuncheng	Provincial level	Machinery and equipment	Automotive parts and accessories processing industry; new decorative materials manufacturing industry
1126	Shanxi Linyi Economic Development Zone	Shanxi	Linfen	Provincial level	Metallurgy	Casting; plastic weaving; pharmaceutical manufacturing
1127	Shanxi Huguan Economic Development Zone	Shanxi	Changzhi	Provincial level	Metallurgy	Steel deep processing; coal chemical industry
1128	Jincheng Economic and Technological Development Zone	Shanxi	Jincheng	National level	High technology	Precision optoelectronic manufacturing; equipment manufacturing; new energy
1129	Emeishan Industrial Concentration Zone	Sichuan	Leshan	-	Building materials	New building materials manufacturing industry; wine beverage manufacturing industry
1130	Sichuan Jiajiang Economic Development Zone	Sichuan	Leshan	Provincial level	Light industry	Ceramics and supporting manufacturing; new materials manufacturing; agricultural products processing industry
1131	Qianwei County Industrial Concentration Zone	Sichuan	Leshan	-	Comprehensive	Chemical raw materials, chemical products manufacturing; forestry pulp paper manufacturing; machinery processing industry
1132	Zhouba Industrial Park, Muchuan County	Sichuan	Leshan	-	Chemical industry	Chemical industry
1133	Leshan (Shawan) Stainless Steel Industrial Park	Sichuan	Leshan	-	Metallurgy	Vanadium-titanium steel; stainless steel manufacturing
1134	Jingyan County Industrial Concentration Zone	Sichuan	Leshan	-	Industrial and agricultural composites	Textile; agricultural product processing industry
1135	Sichuan Jiange Economic Development Zone	Sichuan	Guangyuan	-	Comprehensive	New energy and new materials manufacturing; agricultural product processing; biomedicine
1136	Sichuan Yanting Economic Development Zone	Sichuan	Mianyang	-	Building materials	Electromechanical manufacturing; medicine; building materials
1137	Sichuan Anxian Industrial Park	Sichuan	Mianyang	-	Comprehensive	Automobile; medicine; chemical
1138	Sichuan Jiangyou Industrial Park	Sichuan	Mianyang	-	Machinery and equipment	High-end equipment manufacturing; new energy, new materials; modern medicine green food manufacturing
1139	Sichuan Economic Development Zone	Sichuan	Mianyang	-	Light industry	Food manufacturing; textile; electronic machinery
1140	Yuzhong City Industrial Concentration Zone	Sichuan	Nanchong	-	Light industry	Food and pharmaceutical manufacturing; new materials, clean energy manufacturing
1141	Xichong County Industrial Park	Sichuan	Nanchong	-	High technology	Biotechnology; precision manufacturing
1142	Southern County Industrial Concentration Park	Sichuan	Nanchong	-	Comprehensive	Automotive engine parts and components manufacturing industry; electronic information; food and beverage manufacturing
1143	Sichuan Nanchong Economic Development Zone	Sichuan	Nanchong	-	Comprehensive	New material manufacturing; new energy; fine chemicals
1144	Nanchong Shunqing District Industrial Concentration Zone	Sichuan	Nanchong	-	Comprehensive	New material manufacturing; equipment manufacturing; electronic information
1145	Yingshan County Industrial Concentration Zone	Sichuan	Nanchong	-	Comprehensive	Mechanical auto parts manufacturing; agricultural product processing; electrical building materials manufacturing
1146	Suining Economic and Technological Development Zone	Sichuan	Suining	National level	High technology	Electronic information; mechanical equipment manufacturing
1147	Jiang'an County Industrial Park	Sichuan	Yibin	-	Chemical industry	New chemical industry; green food manufacturing
1148	Yibin Lingang Economic and Technological Development Zone	Sichuan	Yibin	National level	Machinery and equipment	Advanced equipment manufacturing; new materials; modern trade logistics
1149	Yibin Cuiping District Yanpingba Industrial Park	Sichuan	Yibin	-	Light industry	Textile industry; machinery manufacturing
1150	Yibin Luolong Industrial Concentration Zone	Sichuan	Yibin	-	Comprehensive	Green food processing industry; biomedicine; characteristic light industry
1151	Xingwen County Industrial Park	Sichuan	Yibin	-	Others	Industry
1152	Yibin County Industrial Park	Sichuan	Yibin	-	Comprehensive	Integrated energy; metal products manufacturing; alcoholic beverage manufacturing
1153	Gaoxian Fuxi Industrial Concentration Zone	Sichuan	Yibin	-	Comprehensive	Agricultural and sideline products processing industry; building materials; energy
1154	Zigong High-tech Industrial Development Zone	Sichuan	Zigong	National level	High technology	Energy-saving and environmental protection equipment; new materials; machinery manufacturing
1155	Deyang Guanghan High-tech Zone	Sichuan	Deyang	National level	High technology	High-end equipment manufacturing; biomedicine; new materials manufacturing
1156	Sichuan Shifang Economic Development Zone	Sichuan	Deyang	Provincial level	Light industry	Food and pharmaceutical manufacturing; energy-saving and environmentally-friendly building materials; aviation parts and gas turbine industry
1157	Sichuan Luojiang Economic Development Zone	Sichuan	Deyang	-	High technology	Electronic information; mechanical processing; new material manufacturing
1158	Deyang Economic and Technological Development Zone	Sichuan	Deyang	National level	Machinery and equipment	Industry
1159	Luzhou High-tech Industrial Development Zone	Sichuan	Luzhou	National level	Machinery and equipment	Mechanical equipment; modern medicine
1160	Sichuan Hejiang Lingang Industrial Park	Sichuan	Luzhou	-	Light industry	Chemical industry; grain and oil food processing; light industry
1161	Luzhou National High-tech Zone Jiangnan Science and Technology Industrial Park	Sichuan	Luzhou	-	Others	Energy saving and environmental protection; modern commerce; packaging and printing industry
1162	Luzhou liquor Industrial Park	Sichuan	Luzhou	-	Others	Alcohol industry
1163	Zhangzhou Chemical Industry Park	Sichuan	Luzhou	-	Chemical industry	Chemical industry
1164	Sichuan Ya'an Feidi Industrial Park (Sichuan Ya'an Economic Development Zone)	Sichuan	Yaan	Provincial level	High technology	New materials, new energy industry; machinery equipment manufacturing industry
1165	Sichuan Hanyuan Industrial Park	Sichuan	Yaan	-	Metallurgy	Food processing; phosphorus chemical; non-ferrous metal smelting
1166	Sichuan Shimian Industrial Park	Sichuan	Yaan	-	Metallurgy	Metallurgy; chemical industry; new material manufacturing
1167	Yingjing County Industrial Development Zone	Sichuan	Yaan	-	Metallurgy	Alloy manufacturing; new building materials manufacturing
1168	Panzhihua Vanadium and Titanium High-tech Industrial Development Zone	Sichuan	Panzhihua	National level	Metallurgy	Vanadium and titanium industry; vanadium and titanium machinery manufacturing industry; vanadium and titanium supporting industry
1169	Xiangquan Stone Industry Park	Sichuan	Mianyang	-	Building materials	Sheet manufacturing; powder manufacturing
1170	Sichuan Dujiangyan Economic Development Zone	Sichuan	Chengdu	Provincial level	Building materials	Building materials; medicine and food; machinery manufacturing
1171	Sichuan Jintang Industrial Park	Sichuan	Chengdu	-	Others	Energy saving and environmental protection
1172	Sichuan Shuangliu Economic Development Zone	Sichuan	Chengdu	Provincial level	High technology	Electronic information; new energy; biological industry
1173	Tianjin Baodi Low Carbon Industrial Zone	Tianjin	Baodi District	Provincial level	High technology	New energy; high-end equipment; new materials
1174	Tianjin Ziya Circular Economy Industrial Zone	Tianjin	Jinghai District	National level	Others	Comprehensive utilization of renewable resources
1175	Baodi Energy Saving and Environmental Protection Industrial Zone	Tianjin	Baodi District	Provincial level	Comprehensive	Energy saving and environmental protection; new materials; equipment manufacturing
1176	Tianjin Baodi Plastic Products Industrial Zone	Tianjin	Baodi District	-	Others	Plastic products manufacturing
1177	Dazi Industrial Park	Tibet	Lasa	-	Light industry	Plateau characteristic biology and medical medical industry, national handicraft industry, plateau specialty food and beverage industry manufacturing
1178	Luntai Petroleum and Petrochemical Industrial Park	Xinjiang	Bayingol Mongolian Autonomous Prefecture	-	Chemical industry	Petrochemical; oilfield technical service and equipment manufacturing
1179	Hejing Industrial Park	Xinjiang	Bayingol Mongolian Autonomous Prefecture	-	Metallurgy	Steel
1180	Korla Shangku Comprehensive Industrial Park	Xinjiang	Bayingol Mongolian Autonomous Prefecture	-	High technology	Business logistics; equipment manufacturing industry; agricultural product processing industry
1181	Ruoqiang Industrial Park	Xinjiang	Bayingol Mongolian Autonomous Prefecture	-	Comprehensive	Iron fine powder special iron alloy manufacturing; new energy, new building materials manufacturing; colored and rare metal refining
1182	Yanqi Industrial Park	Xinjiang	Bayingol Mongolian Autonomous Prefecture	-	Light industry	Agricultural and sideline products processing; wine grape industry
1183	Xinjiang Zhudong Economic and Technological Development Zone	Xinjiang	Changji Hui Autonomous Prefecture	National level	Others	Coal power; coal chemical industry; coal power generation and smelting integration
1184	Changji High-tech Industrial Development Zone	Xinjiang	Changji Hui Autonomous Prefecture	National level	Comprehensive	Equipment manufacturing; biotechnology; new materials
1185	Karamay Petrochemical Industrial Park Management Committee	Xinjiang	Kelamayi	-	Chemical industry	Petrochemical; oil and gas technical services; equipment manufacturing
1186	Xinjiang Jimu is the Border Economic Cooperation Zone	Xinjiang	Altay Prefecture	National level	Comprehensive	Oil and gas processing; wind power equipment manufacturing; agricultural product processing
1187	Heilongjiang Fuyun Industrial Park	Xinjiang	Altay Prefecture	-	Machinery and equipment	Equipment manufacturing; agricultural product processing; logistics
1188	Shawan Industrial Park	Xinjiang	Tarbagatay Prefecture	-	Building materials	Textile; chemical; building materials
1189	Hami Industrial Park Management Committee	Xinjiang	Hami	-	Machinery and equipment	Equipment manufacturing; power production
1190	Hotan County Economic New District	Xinjiang	Hotan Prefecture	-	Building materials	Building materials; agricultural and sideline products processing; service
1191	Hetian County Kunlun Industrial Park	Xinjiang	Hotan Prefecture	-	Comprehensive	Building materials; food processing; service
1192	Minfeng County Industrial Park	Xinjiang	Hotan Prefecture	-	Industrial and agricultural composites	Textile and garment; agricultural and sideline products processing; building materials, mining processing
1193	Shanshan Stone Industrial Park Management Committee	Xinjiang	Tulufan	-	Comprehensive	Stone processing; casting and forging; photovoltaic
1194	Toksun Energy Heavy Chemical Industry Park	Xinjiang	Tulufan	-	Chemical industry	Electricity; chemical industry; manufacturing
1195	Turpan Shenhong Chemical Industrial Park	Xinjiang	Tulufan	-	Chemical industry	Inorganic salt chemical industry; metal smelting
1196	Mahatma Tongxinyuan Industrial Park	Xinjiang	Tulufan	-	Chemical industry	Chemical industry
1197	Yingjisha Industrial Park	Xinjiang	Kashgar	-	Others	Textile and clothing; food processing; assembly processing
1198	Yuepu Lake Taiyue Industrial Park	Xinjiang	Kashgar	-	Industrial and agricultural composites	Agricultural and sideline products processing; textile and clothing
1199	Megiti Industrial Park	Xinjiang	Kashgar	-	Comprehensive	Textile industry; agricultural product processing; manufacturing
1200	Urumqi Ganquanbao Economic and Technological Development Zone (Industrial Zone)	Xinjiang	Urumchi	National level	High technology	Coal chemical industry; photovoltaic industry; thermoelectric building materials
1201	Xinjiang Alar Economic and Technological Development Zone	Xinjiang	Alaer	National level	Comprehensive	Agricultural and sideline products deep processing, cotton spinning, chemical industry
1202	The Second Division of the Corps Kuxi Economic Industrial Park	Xinjiang	Korla	Provincial level	Comprehensive	Textile and garment, chemical, agricultural and sideline products processing
1203	The fourth division of the Corps Jingang Circular Economy Industrial Park	Xinjiang	Ili Kazak Autonomous Prefecture	Provincial level	Comprehensive	Silicon industry, coal power, non-ferrous smelting
1204	The 7th Division of the Corps Wuwu Industrial Park	Xinjiang	Karamay	Provincial level	Comprehensive	Coal chemical, petrochemical, salt chemical
1205	The 13th Division of the Corps Hami Erdaohu Industrial Park	Xinjiang	Hami	Provincial level	Comprehensive	Metallurgy, coal chemical industry, new building materials
1206	Qujing Economic and Technological Development Zone	Yunnan	Qujing	National level	Metallurgy	Non-ferrous metals and finishing industries; automotive and equipment manufacturing industries; bio-pharmaceutical industry
1207	Xuanwei Economic Development Zone	Yunnan	Qujing	Provincial level	Chemical industry	Chemical industry; mining and metallurgy; food manufacturing
1208	Yunnan Tengchong Economic Development Zone	Yunnan	Baoshan	Provincial level	Light industry	Wood processing; stone processing; food and pharmaceutical processing
1209	Yunnan Huaping Economic Development Zone	Yunnan	Lijiang	Provincial level	Chemical industry	Coal chemical industry; building materials; biological processing
1210	Chuxiong Economic Development Zone	Yunnan	Chuxiong	Provincial level	Building materials	Biomedicine; metallurgical building materials; equipment manufacturing
1211	Mengzi Economic and Technological Development Zone	Yunnan	Hani-Yi Autonomous Prefecture of Honghe	National level	Metallurgy	Steel; non-ferrous metals; chemical industry
1212	Yunnan Province Kaiyuan Economic Development Zone	Yunnan	Hani-Yi Autonomous Prefecture of Honghe	Provincial level	Comprehensive	Deep processing of agricultural products and agricultural services
1213	Xundian Characteristic Industrial Park	Yunnan	Kunming	-	Chemical industry	Coal phosphorus chemical industry; furniture equipment manufacturing; new material manufacturing
1214	Fumin Industrial Park	Yunnan	Kunming	-	Chemical industry	Titanium salt chemical industry; equipment manufacturing; new material manufacturing
1215	Yanliang Industrial Park	Yunnan	Shaotong	-	Metallurgy	Non-ferrous metals; carbon and coal chemicals; biological resources
1216	Zhaodian Ludian County Industrial Park	Yunnan	Shaotong	-	Comprehensive	Mining and metallurgy; energy production; processing of agricultural special products
1217	Yuxi Yanhe Industrial Park	Yunnan	Yuxi	-	Comprehensive	New equipment manufacturing; steel and rolling processing; modern logistics-based service industry
1218	Tonghai Hardware Industry Park	Yunnan	Yuxi	-	Machinery and equipment	Hardware and electromechanical; color printing packaging; food processing
1219	Yimen Industrial Park	Yunnan	Yuxi	Provincial level	Metallurgy	Metallurgical new materials; ceramic building materials; plateau agricultural products processing
1220	Chengjiang Industrial Park	Yunnan	Yuxi	-	Light industry	Business logistics; food processing; biomedicine
1221	Yuxi Economic Development Zone (Hongta Industrial Park)	Yunnan	Yuxi	-	Metallurgy	Steel and processing; modern agricultural products processing; building materials
1222	Xinping Mining Circular Economy Industrial Park	Yunnan	Yuxi	-	Others	Mining and metallurgy; equipment manufacturing; biological resource processing
1223	Pu'er Industrial Park	Yunnan	Pu'er	-	Others	Biological industry; green energy-carrying industry; forest industry
1224	Jinggu Forest Industry Park	Yunnan	Pu'er	-	Industrial and agricultural composites	Forest sheet; forest chemical; forestry pulp paper manufacturing
1225	Baoshan Industry and Trade Park	Yunnan	Baoshn	-	Building materials	Textile industry; IDC industry; building materials and wood processing trade
1226	Baoshan Shuichang Industrial Park	Yunnan	Baoshn	-	Building materials	Building materials; stone; processing of agricultural special products
1227	Longling Industrial Park	Yunnan	Baoshn	-	Comprehensive	Metal silicon smelting; biological industry; building materials
1228	Changning Biological Resources Processing Industrial Park	Yunnan	Baoshn	-	Industrial and agricultural composites	Biological resource processing
1229	Lijiang City Yongsheng County Industrial Park	Yunnan	Lijiang	-	Light industry	Food processing industry; biological resources; clean energy
1230	Linyi Industrial Park	Yunnan	Lincang	-	High technology	Processing industry
1231	Wenshan Matang Industrial Park	Yunnan	Wenshan Zhuang and Miao Autonomous Prefecture	-	Metallurgy	Aluminum industry; chlor-alkali chemical industry; building materials
1232	Wenshan Sanqi Pharmaceutical Industrial Park	Yunnan	Wenshan Zhuang and Miao Autonomous Prefecture	-	Others	Biomedicine; farmer product processing
1233	Lushan Industrial Park	Yunnan	Wenshan Zhuang and Miao Autonomous Prefecture	-	Comprehensive	Electronic clothing; biological resources; building materials and ferroalloys
1234	Dengchuan Industrial Park, Wuyuan County	Yunnan	Dali	-	Machinery and equipment	Equipment manufacturing; biological resource processing; energy saving and environmental protection industry
1235	Xiangyun Fortune Industrial Park	Yunnan	Dali	-	Metallurgy	Metallurgical processing industry; agricultural products; chemical industry
1236	Gejiu Industrial Park	Yunnan	Hani-Yi Autonomous Prefecture of Honghe	-	Metallurgy	Non-ferrous metal smelting
1237	Yunnan Shuifu Industrial Park	Yunnan	Shaotong	-	Comprehensive	Processing industry
1238	Dayao County Industrial Park	Yunnan	Chuxiong	-	Industrial and agricultural composites	Plateau specialty food processing; metallurgy and minerals
1239	Nanhua County Industrial Park	Yunnan	Chuxiong	-	Comprehensive	New light industry; wild mushroom industry; green food processing industry
1240	Wuding County Industrial Park	Yunnan	Chuxiong	-	Chemical industry	Metallurgy, chemical industry; new industry
1241	Zhenxiong County Industrial Park	Yunnan	Shaotong	-	Chemical industry	Coal-fired coal chemical industry; characteristic biological resource processing; logistics
1242	Yanjin Industrial Park	Yunnan	Shaotong	-	Chemical industry	Hydropower development; calcium carbide chemical industry
1243	Daguan Industrial Park	Yunnan	Shaotong	-	Comprehensive	Chemical industry; building materials; silicon industry
1244	Qiaojia County Industrial Park	Yunnan	Shaotong	-	Building materials	Building materials industry; agricultural special product processing; agricultural special product processing
1245	Yuxi Dahua Industrial Park	Yunnan	Yuxi	-	Comprehensive	Equipment manufacturing; biological food; metallurgy and extension processing
1246	Fengqing County Yuhong Ecological Industrial Park	Yunnan	Lincang	-	Industrial and agricultural composites	Tea processing; walnut processing; special agricultural products processing
1247	Shuangbai County Industrial Park	Yunnan	Chuxiong	-	Industrial and agricultural composites	Forest product processing; plateau specialty food processing; other
1248	Yongren County Industrial Park	Yunnan	Chuxiong	-	Machinery and equipment	Foundry, machinery manufacturing; agricultural product processing; stone art processing, building materials
1249	Honghe County Characteristic Industrial Park	Yunnan	Hani-Yi Autonomous Prefecture of Honghe	-	Others	Green resource processing; new environmentally friendly materials production; biopharmaceutical
1250	Ningbo Daxie Development Zone	Zhejiang	Ningbo	National level	Chemical industry	Petrochemical industry
1251	Ningbo Hangzhou Bay Industrial Cluster Area	Zhejiang	Ningbo	-	Machinery and equipment	Automobile manufacturing and key component manufacturing; smart electrical appliance manufacturing; new material manufacturing
1252	Ningbo Bonded Area (Ningbo Export Processing Zone)	Zhejiang	Ningbo	National level	High technology	Computer, communications and other electronic equipment manufacturing; electrical machinery and equipment manufacturing; metal products industry
1253	Ningbo Economic and Technological Development Zone	Zhejiang	Ningbo	National level	Chemical industry	Petrochemical; steel; papermaking
1254	Ningbo Petrochemical Economic and Technological Development Zone	Zhejiang	Ningbo	National level	Chemical industry	Petrochemical industry
1255	Xiangshan Economic Development Zone	Zhejiang	Ningbo	Provincial level	Light industry	Textile and garment, apparel industry; electrical machinery and equipment manufacturing; special equipment manufacturing
1256	Ningbo Wangchun Industrial Park	Zhejiang	Ningbo	Provincial level	Comprehensive	Electronic information; new energy and new materials; clothing manufacturing
1257	Zhangzhou Industrial Park	Zhejiang	Ningbo	Provincial level	Machinery and equipment	Electrical machinery manufacturing; powder metallurgy
1258	Zhangzhou Economic Development Zone	Zhejiang	Ningbo	Provincial level	Comprehensive	New materials manufacturing; auto parts manufacturing; electronic and electrical manufacturing
1259	Zhejiang Yuyao Economic Development Zone	Zhejiang	Ningbo	Provincial level	Machinery and equipment	Household appliance manufacturing; machinery, hardware, mold, plastics manufacturing; chemical fiber
1260	Ningbo National High-tech Zone	Zhejiang	Ningbo	National level	High technology	Technology service industry
1261	Hangzhou Economic and Technological Development Zone	Zhejiang	Hangzhou	National level	Machinery and equipment	Equipment manufacturing; electronic food; modern food
1262	Zhejiang Chun'an Economic Development Zone	Zhejiang	Hangzhou	Provincial level	Comprehensive	Electrical machinery and equipment manufacturing; textile industry; wine, beverage and refined tea manufacturing
1263	Fuyang Economic and Technological Development Zone	Zhejiang	Hangzhou	National level	High technology	Communication manufacturing; mechanical and electronic instrument manufacturing; biochemical pharmaceutical manufacturing
1264	Zhejiang Jiande Economic Development Zone (Hangzhou Jiande High-tech Industrial Park)	Zhejiang	Hangzhou	Provincial level	Chemical industry	Fine chemicals; cement building materials; metallurgical products
1265	Lin'an Economic Development Zone, Zhejiang Province	Zhejiang	Hangzhou	Provincial level	Machinery and equipment	Equipment manufacturing
1266	Xiaoshan Economic and Technological Development Zone	Zhejiang	Hangzhou	National level	Machinery and equipment	Machinery industry; clothing industry; textile industry
1267	Hangzhou Dajiangdong Industrial Cluster Area	Zhejiang	Hangzhou	-	Machinery and equipment	Advanced equipment manufacturing
1268	Zhejiang Tonglu Economic Development Zone	Zhejiang	Hangzhou	Provincial level	Comprehensive	Needle textile; new energy and new materials; equipment manufacturing
1269	Wenzhou Economic and Technological Development Zone	Zhejiang	Wenzhou	National level	Comprehensive	Automotive industry; high-end equipment; modern logistics
1270	Zhejiang Wenzhou Lucheng Light Industrial Park	Zhejiang	Wenzhou	Provincial level	Machinery and equipment	Equipment manufacturing industry; high-end traditional industry
1271	Zhejiang Pingyang Economic Development Zone	Zhejiang	Wenzhou	-	Comprehensive	Machinery manufacturing; leather manufacturing; plastic packaging manufacturing
1272	Rui'an Economic Development Zone	Zhejiang	Ruian	-	Chemical industry	Polymer materials; automobile and motorcycle manufacturing; machinery and electronics manufacturing
1273	Zhejiang Yongjia Industrial Park	Zhejiang	Wenzhou	Provincial level	Light industry	Pump and valve manufacturing; garment manufacturing; shoe leather manufacturing
1274	Zhejiang Cangnan Industrial Park	Zhejiang	Wenzhou	-	Comprehensive	Packaging industry; electromechanical; aquatic product processing
1275	Huzhou Economic and Technological Development Zone	Zhejiang	Huzhou	National level	High technology	Energy conservation and environmental protection; biomedicine; new materials manufacturing
1276	Wuxing Industrial Park	Zhejiang	Huzhou	Provincial level	High technology	Textile and garment; new material manufacturing; equipment manufacturing
1277	Nanxun Economic Development Zone	Zhejiang	Huzhou	Provincial level	Comprehensive	Elevator manufacturing; wood industry; motor manufacturing
1278	Changxing Economic and Technological Development Zone	Zhejiang	Huzhou	National level	Comprehensive	New energy; household appliances; equipment manufacturing
1279	Anji Development Zone	Zhejiang	Huzhou	Provincial level	Light industry	Bamboo products manufacturing; office furniture
1280	Zhejiang Deqing Industrial Park	Zhejiang	Huzhou	Provincial level	Comprehensive	New building materials; food processing and packaging; equipment manufacturing
1281	Huzhou Moganshan High-tech Industrial Development Zone (Zhejiang Deqing Economic Development Zone)	Zhejiang	Huzhou	National level	Machinery and equipment	Mechatronics; new textiles; new building materials
1282	Zhejiang Haining Warp Knitting Industrial Park	Zhejiang	Jiaxing	Provincial level	Light industry	Industrial fabric manufacturing; apparel fabric manufacturing
1283	Haining Economic Development Zone	Zhejiang	Jiaxing	Provincial level	Light industry	Leather manufacturing; textile; machinery manufacturing
1284	Jiaxing Economic and Technological Development Zone	Zhejiang	Jiaxing	National level	Machinery and equipment	Automotive parts and components; precision machinery manufacturing; high-end food manufacturing
1285	Zhejiang Dushan Port Economic Development Zone	Zhejiang	Jiaxing	-	Comprehensive	Chemical raw materials and chemical products manufacturing; textile and garment, apparel industry; electrical machinery and equipment manufacturing
1286	Tongxiang Economic Development Zone Management Committee	Zhejiang	Jiaxing	Provincial level	Comprehensive	Chemical fiber textile; new special material; mechanical equipment
1287	Zhejiang Tongxiang Shuyuan Knitting Industrial Park	Zhejiang	Jiaxing	Provincial level	Light industry	Sweater manufacturing
1288	Xiuzhou High-tech Zone	Zhejiang	Jiaxing	National level	Comprehensive	Photovoltaic new energy; equipment manufacturing; new material manufacturing
1289	Jiaxing Industrial Park	Zhejiang	Jiaxing	Provincial level	Comprehensive	Auto parts and electromechanical; new material manufacturing; information electronics
1290	Pinghu Economic and Technological Development Zone	Zhejiang	Jiaxing	National level	Comprehensive	Opto-mechanical; biotechnology
1291	Zhejiang Zhangpu Economic Development Zone	Zhejiang	Jiaxing	Provincial level	Chemical industry	Chemical new material manufacturing
1292	Zhejiang Haiyan Economic Development Zone	Zhejiang	Jiaxing	-	Comprehensive	Waste resource comprehensive utilization industry; paper and paper products industry; ferrous metal smelting and rolling processing industry
1293	Jiashan Economic and Technological Development Zone	Zhejiang	Jiaxing	National level	Machinery and equipment	Equipment manufacturing; wood furniture manufacturing; electronic information
1294	Zhejiang Shangyu Economic and Technological Development Zone	Zhejiang	Shaoxing	-	Machinery and equipment	Electrical and mechanical manufacturing; textile; lighting manufacturing
1295	Hangzhou Bay Shangyu Economic and Technological Development Zone	Zhejiang	Shaoxing	National level	Light industry	Dye manufacturing industry; medicine
1296	Shaoxing High-tech Industrial Development Zone	Zhejiang	Shaoxing	National level	Comprehensive	Life health; electronic information; environmental protection
1297	Zhejiang Xinchang High-tech Industrial Park	Zhejiang	Shaoxing	Provincial level	Comprehensive	Refrigeration parts; auto parts; biomedicine
1298	Xinchang Industrial Park	Zhejiang	Shaoxing	Provincial level	Light industry	Pharmaceutical manufacturing; bearing manufacturing; rubber products
1299	Zhejiang Shaoxing Binhai Industrial Park	Zhejiang	Shaoxing	Provincial level	Others	Chemical fiber; textile printing and dyeing; metal rolling
1300	Dongyang Economic Development Zone	Zhejiang	Jinhua	Provincial level	Light industry	Clothing; textile; biomedicine
1301	Zhejiang Dongyang Hengdian Electronic Industry Park	Zhejiang	Jinhua	Provincial level	Machinery and equipment	Magnetic electronics; mahogany furniture manufacturing
1302	Jinhua Economic and Technological Development Zone	Zhejiang	Jinhua	National level	Machinery and equipment	Automobiles and accessories; pharmaceutical and chemical; electronics and new materials manufacturing
1303	Zhejiang Chun'an Industrial Park	Zhejiang	Jinhua	Provincial level	Comprehensive	Plastic manufacturing industry; automobile and motorcycle manufacturing industry; light industry
1304	Zhejiang Pujiang Economic Development Zone	Zhejiang	Jinhua	Provincial level	Comprehensive	Culture and education, industry and beauty, sports and entertainment products manufacturing; textile industry; textile and garment, clothing industry
1305	Zhejiang Wuyi Economic Development Zone	Zhejiang	Jinhua	Provincial level	Machinery and equipment	Metal products industry; ferrous metal smelting and rolling processing industry; furniture manufacturing
1306	Changshan Industrial Park	Zhejiang	Quzhou	Provincial level	Comprehensive	Metal processing; new materials; building materials; agricultural products; complete sets of equipment;
1307	Zhejiang Jiangshan Economic Development Zone	Zhejiang	Quzhou	Provincial level	Machinery and equipment	Electrical machinery; chemical industry; textile
1308	Zhejiang Kaihua Industrial Park	Zhejiang	Quzhou	Provincial level	High technology	Cultural creativity; new material manufacturing; photovoltaic
1309	Zhejiang Longyou Industrial Park	Zhejiang	Quzhou	Provincial level	Light industry	Papermaking and deep processing; hardware machinery; textile, garment and jewelry manufacturing
1310	Zhejiang Hanjiang Economic Development Zone	Zhejiang	Quzhou	Provincial level	Light industry	Special paper manufacturing; mechanical equipment
1311	Zhejiang Yinzhou High-tech Industrial Park	Zhejiang	Quzhou	National level	Chemical industry	Fluorosilicon manufacturing
1312	Lushan Economic Development Zone	Zhejiang	Zhoushan	Provincial level	Machinery and equipment	Ship and marine engineering industry; marine life industry; light industry electronics industry
1313	Zhejiang Putuo Economic Development Zone	Zhejiang	Zhoushan	Provincial level	Machinery and equipment	Shipbuilding
1314	Zhejiang Dinghai Industrial Park	Zhejiang	Zhoushan	Provincial level	Chemical industry	Petrochemical; ship repair and demolition; comprehensive utilization of waste gas resources
1315	Jiaojiang Block, Zhejiang Taizhou Chemical Raw Material Medicine Industrial Park	Zhejiang	Taizhou	Provincial level	Chemical industry	Medical; electromechanical; optoelectronics
1316	Zhejiang Huangyan Economic Development Zone Management Committee	Zhejiang	Taizhou	Provincial level	Chemical industry	Rubber and plastics; special equipment; chemical raw materials and chemical manufacturing manufacturing
1317	Wenling Industrial Park	Zhejiang	Taizhou	Provincial level	Comprehensive	Pump and motor manufacturing; automobile and motorcycle manufacturing industry; footwear industry
1318	Zhejiang Wenling Economic Development Zone	Zhejiang	Taizhou	Provincial level	Comprehensive	General equipment; transportation equipment; electrical machinery
1319	Yuhuan Economic Development Zone	Zhejiang	Taizhou	Provincial level	Machinery and equipment	Automotive industry; metal products industry; instrumentation industry
1320	Zhejiang Xianju Economic Development Zone	Zhejiang	Taizhou	-	Chemical industry	Pharmaceutical and chemical industry; rubber and plastics manufacturing; craft gift manufacturing
1321	Zhejiang Sanmen Economic Development Zone	Zhejiang	Taizhou	-	Comprehensive	Rubber and plastic products; electromechanical; specialty consumer goods
1322	Tiantai County Industrial Park	Zhejiang	Taizhou	Provincial level	Machinery and equipment	Mechanical manufacturing; rubber; industrial fabric manufacturing
1323	Taizhou Metal Resources Recycling Industry Base	Zhejiang	Taizhou	-	Others	Metal recycling industry
1324	Zhejiang Taizhou Chemical Raw Material Medicine Industrial Park (Linhai Park)	Zhejiang	Taizhou	-	Chemical industry	Pharmaceutical and chemical industry; synthetic leather manufacturing
1325	Zhejiang Suichang Industrial Park	Zhejiang	Lishui	Provincial level	Building materials	Industry
1326	Zhejiang Jinyun Economic Development Zone (Zhejiang Jinyun Industrial Park)	Zhejiang	Lishui	-	Machinery and equipment	Mechanical equipment; automobile and motorcycle parts manufacturing industry; building materials industry
1327	Lishui Economic and Technological Development Zone	Zhejiang	Lishui	National level	Light industry	Ecological synthetic leather industry; equipment manufacturing industry; biomedical industry
1328	Lishui Industrial Park	Zhejiang	Lishui	-	Machinery and equipment	Machining
1329	Zhejiang Longquan Economic Development Zone	Zhejiang	Lishui	-	Machinery and equipment	Hardware auto parts industry; deep processing industry of agricultural and forestry products; celadon sword industry
1330	Zhejiang Qingtian Economic Development Zone	Zhejiang	Lishui	Provincial level	Metallurgy	Stainless steel and its deep processing; shoe leather apparel manufacturing; general equipment manufacturing
1331	Zhejiang Qingyuan Industrial Park	Zhejiang	Lishui	Provincial level	Industrial and agricultural composites	Bamboo and wood products processing; edible mushroom processing; pencil manufacturing
1332	Songyang Industrial Park	Zhejiang	Lishui	-	Light industry	Stainless steel industry; synthetic leather industry; textile industry
1333	Zhejiang Yunhe Industrial Park Management Committee	Zhejiang	Lishui	Provincial level	Comprehensive	Wooden toy manufacturing; calendering manufacturing; bearing manufacturing
